# Supplementary material
Source: PubMed Central journal article supplement (PMC3882005)

# checkCIF/PLATON report

Structure factors have been supplied for datablock(s) paul017

No syntax errors found.      CIF dictionary      Interpreting this report

## Datablock: paul017

---

Bond precision:    C-C = 0.0044 A                      Wavelength=0.71073

Cell:              a=15.6613(14)              b=16.8213(16)              c=19.0713(17)  
                    alpha=107.424(4)              beta=100.597(4)              gamma=105.364(4)

Temperature:    110 K

|                | Calculated                                            | Reported                              |
|----------------|-------------------------------------------------------|---------------------------------------|
| Volume         | 4429.1(7)                                             | 4429.1(7)                             |
| Space group    | P -1                                                  | P-1                                   |
| Hall group     | -P 1                                                  | ?                                     |
| Moiety formula | 4(C30 H24 N6 O2 Ru), C7 H5<br>N, 8(F6 P), 8(C4 H10 O) | ?                                     |
| Sum formula    | C159 H181 F48 N25 O16 P8<br>Ru4                       | C79.50 H90.50 F24 N12.50<br>O8 P4 Ru2 |
| Mr             | 4262.33                                               | 2131.16                               |
| Dx,g cm-3      | 1.598                                                 | 1.598                                 |
| Z              | 1                                                     | 2                                     |
| Mu (mm-1)      | 0.525                                                 | 0.525                                 |
| F000           | 2166.0                                                | 2166.0                                |
| F000'          | 2163.12                                               |                                       |
| h,k,lmax       | 24,25,29                                              | 24,25,29                              |
| Nref           | 33910                                                 | 33738                                 |
| Tmin,Tmax      | 0.934,0.959                                           | 0.935,0.959                           |
| Tmin'          | 0.934                                                 |                                       |

Correction method= MULTI-SCAN

Data completeness= 0.995                      Theta(max)= 33.190

R(reflections)= 0.0551( 20396)              wR2(reflections)= 0.1482( 33738)

S = 1.019                                      Npar= 1303

---

The following ALERTS were generated. Each ALERT has the format  
**test-name\_ALERT\_alert-type\_alert-level**.  
Click on the hyperlinks for more details of the test.

---

### Alert level B

PLAT973\_ALERT\_2\_B Large Calcd. Positive Residual Density on      Ru2              1.86 eA-3

---

● **Alert level C**

|                   |                                                                     |      |       |
|-------------------|---------------------------------------------------------------------|------|-------|
| PLAT045_ALERT_1_C | Calculated and Reported Z Differ by .....                           | 0.50 | Ratio |
| PLAT244_ALERT_4_C | Low 'Solvent' Ueq as Compared to Neighbors of                       | P1   |       |
| PLAT244_ALERT_4_C | Low 'Solvent' Ueq as Compared to Neighbors of                       | P2   |       |
| PLAT244_ALERT_4_C | Low 'Solvent' Ueq as Compared to Neighbors of                       | P3   |       |
| PLAT244_ALERT_4_C | Low 'Solvent' Ueq as Compared to Neighbors of                       | P4   |       |
| PLAT250_ALERT_2_C | Large U3/U1 Ratio for Average U(i,j) Tensor ....                    | 2.1  |       |
| PLAT354_ALERT_3_C | Short O-H Bond (0.82A) O1 - H1 ...                                  | 0.67 | Ang.  |
| PLAT354_ALERT_3_C | Short O-H Bond (0.82A) O4 - H4 ...                                  | 0.66 | Ang.  |
| PLAT790_ALERT_4_C | Centre of Gravity not Within Unit Cell: Resd. #<br>C30 H24 N6 O2 Ru | 1    |       |
| PLAT910_ALERT_3_C | Missing # of FCF Reflections Below Th(Min) .....                    | 2    |       |
| PLAT911_ALERT_3_C | Missing # FCF Refl Between THmin & STh/L= 0.600                     | 3    |       |
| PLAT912_ALERT_4_C | Missing # of FCF Reflections Above STh/L= 0.600                     | 161  |       |
| PLAT971_ALERT_2_C | Large Calcd. Non-Metal Positive Residual Density                    | 1.68 | eA-3  |

---

● **Alert level G**

|                   |                                                  |         |       |
|-------------------|--------------------------------------------------|---------|-------|
| PLAT002_ALERT_2_G | Number of Distance or Angle Restraints on AtSite | 20      |       |
| PLAT003_ALERT_2_G | Number of Uiso or Uij Restrained Atom Sites .... | 20      |       |
| PLAT005_ALERT_5_G | No _iucr_refine_instructions_details in CIF .... | ?       |       |
| PLAT154_ALERT_1_G | The su's on the Cell Angles are Equal .....      | 0.00400 | Deg.  |
| PLAT232_ALERT_2_G | Hirshfeld Test Diff (M-X) Rul -- N5 ..           | 5.2     | su    |
| PLAT244_ALERT_4_G | Low 'Solvent' Ueq as Compared to Neighbors of    | C66     |       |
| PLAT302_ALERT_4_G | Note: Anion/Solvent Disorder .....               | 27      | Perc. |
| PLAT860_ALERT_3_G | Note: Number of Least-Squares Restraints .....   | 282     |       |

---

0 **ALERT level A** = Most likely a serious problem - resolve or explain  
1 **ALERT level B** = A potentially serious problem, consider carefully  
13 **ALERT level C** = Check. Ensure it is not caused by an omission or oversight  
8 **ALERT level G** = General information/check it is not something unexpected

2 ALERT type 1 CIF construction/syntax error, inconsistent or missing data  
6 ALERT type 2 Indicator that the structure model may be wrong or deficient  
5 ALERT type 3 Indicator that the structure quality may be low  
8 ALERT type 4 Improvement, methodology, query or suggestion  
1 ALERT type 5 Informative message, check

---

It is advisable to attempt to resolve as many as possible of the alerts in all categories. Often the minor alerts point to easily fixed oversights, errors and omissions in your CIF or refinement strategy, so attention to these fine details can be worthwhile. In order to resolve some of the more serious problems it may be necessary to carry out additional measurements or structure refinements. However, the purpose of your study may justify the reported deviations and the more serious of these should normally be commented upon in the discussion or experimental section of a paper or in the "special\_details" fields of the CIF. checkCIF was carefully designed to identify outliers and unusual parameters, but every test has its limitations and alerts that are not important in a particular case may appear. Conversely, the absence of alerts does not guarantee there are no aspects of the results needing attention. It is up to the individual to critically assess their own results and, if necessary, seek expert advice.

### **Publication of your CIF in IUCr journals**

A basic structural check has been run on your CIF. These basic checks will be run on all CIFs submitted for publication in IUCr journals (*Acta Crystallographica*, *Journal of Applied Crystallography*, *Journal of Synchrotron Radiation*); however, if you intend to submit to *Acta Crystallographica Section C* or *E*, you should make sure that full publication checks are run on the final version of your CIF prior to submission.

### **Publication of your CIF in other journals**

Please refer to the *Notes for Authors* of the relevant journal for any special instructions relating to CIF submission.

---

**PLATON version of 19/04/2012; check.def file version of 14/04/2012**

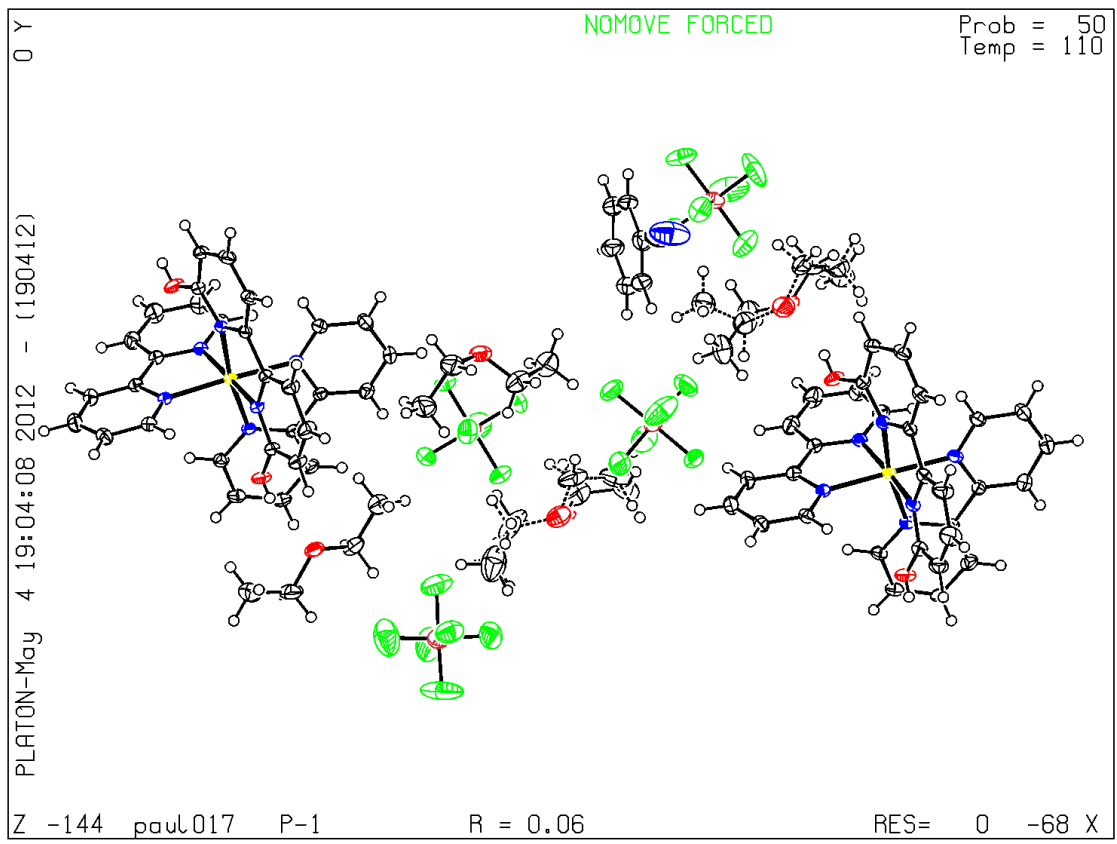

Supplement: NIHMS534305-supplement-04.pdf [file NIHMS534305-supplement-04.pdf]
