# Supplementary material
Source: PubMed Central journal article supplement (PMC3882005)

# checkCIF/PLATON report

Structure factors have been supplied for datablock(s) paul020s

No syntax errors found.      CIF dictionary      Interpreting this report

## Datablock: paul020s

---

Bond precision:    C-C = 0.0031 A                      Wavelength=0.71073

Cell:              a=9.4108(7)              b=12.2807(9)              c=13.0032(10)  
                    alpha=84.343(4)              beta=88.748(4)              gamma=73.877(4)

Temperature:      120 K

|                        | Calculated       | Reported                  |
|------------------------|------------------|---------------------------|
| Volume                 | 1436.63(19)      | 1436.63(19)               |
| Space group            | P -1             | P-1                       |
| Hall group             | -P 1             | ?                         |
| Moiety formula         | C30 H22 N6 O2 Ru | ?                         |
| Sum formula            | C30 H22 N6 O2 Ru | C33 H28.50 N6.50 O2.50 Ru |
| Mr                     | 599.61           | 657.19                    |
| Dx,g cm <sup>-3</sup>  | 1.386            | 1.519                     |
| Z                      | 2                | 2                         |
| Mu (mm <sup>-1</sup> ) | 0.582            | 0.591                     |
| F000                   | 608.0            | 672.0                     |
| F000'                  | 605.67           |                           |
| h,k,lmax               | 13,18,19         | 13,18,19                  |
| Nref                   | 9795             | 9615                      |
| Tmin,Tmax              | 0.899,0.943      | 0.901,0.943               |
| Tmin'                  | 0.899            |                           |

Correction method= MULTI-SCAN

Data completeness= 0.982                      Theta(max)= 31.790

R(reflections)= 0.0368( 7918)              wR2(reflections)= 0.0889( 9615)

S = 1.024                                      Npar= 352

---

The following ALERTS were generated. Each ALERT has the format

**test-name\_ALERT\_alert-type\_alert-level.**

Click on the hyperlinks for more details of the test.

---

### Alert level B

CHEMW03\_ALERT\_2\_B WARNING: The ratio of given/expected molecular weight as calculated from the \_atom\_site\* data lies outside the range 0.95 <> 1.05

From the CIF: \_cell\_formula\_units\_Z

2

From the CIF: `_chemical_formula_weight` 657.19  
 TEST: Calculate formula weight from `_atom_site_*`

| atom | mass   | num   | sum    |
|------|--------|-------|--------|
| C    | 12.01  | 30.00 | 360.33 |
| H    | 1.01   | 22.00 | 22.18  |
| N    | 14.01  | 6.00  | 84.04  |
| O    | 16.00  | 2.00  | 32.00  |
| Ru   | 101.07 | 1.00  | 101.07 |

Calculated formula weight 599.62

**Alert level C**

PLAT041\_ALERT\_1\_C Calc. and Reported SumFormula Strings Differ ?  
 PLAT068\_ALERT\_1\_C Reported F000 Differs from Calcd (or Missing)... ?  
 PLAT230\_ALERT\_2\_C Hirshfeld Test Diff for C2 -- C3 .. 6.5 su  
 PLAT911\_ALERT\_3\_C Missing # FCF Refl Between THmin & STh/L= 0.600 2  
 PLAT975\_ALERT\_2\_C Positive Residual Density at 0.83A from O1 . 0.52 eA-3

**Alert level G**

FORMU01\_ALERT\_2\_G There is a discrepancy between the atom counts in the  
`_chemical_formula_sum` and the formula from the `_atom_site*` data.  
 Atom count from `_chemical_formula_sum`: C33 H28.5 N6.5 O2.5 Ru1  
 Atom count from the `_atom_site` data: C30 H22 N6 O2 Ru1

CELLZ01\_ALERT\_1\_G Difference between formula and atom\_site contents detected.  
 CELLZ01\_ALERT\_1\_G ALERT: Large difference may be due to a  
 symmetry error - see SYMMG tests

From the CIF: `_cell_formula_units_Z` 2  
 From the CIF: `_chemical_formula_sum` C33 H28.50 N6.50 O2.50 Ru  
 TEST: Compare cell contents of formula and atom\_site data

| atom | Z*formula | cif sites | diff  |
|------|-----------|-----------|-------|
| C    | 66.00     | 60.00     | 6.00  |
| H    | 57.00     | 44.00     | 13.00 |
| N    | 13.00     | 12.00     | 1.00  |
| O    | 5.00      | 4.00      | 1.00  |
| Ru   | 2.00      | 2.00      | 0.00  |

PLAT005\_ALERT\_5\_G No `_iucr_refine_instructions_details` in CIF .... ?  
 PLAT154\_ALERT\_1\_G The su's on the Cell Angles are Equal ..... 0.00400 Deg.  
 PLAT232\_ALERT\_2\_G Hirshfeld Test Diff (M-X) Ru1 -- N4 .. 5.4 su  
 PLAT232\_ALERT\_2\_G Hirshfeld Test Diff (M-X) Ru1 -- N5 .. 5.3 su  
 PLAT605\_ALERT\_4\_G Structure Contains Solvent Accessible VOIDS of . 277 A\*\*3  
 PLAT869\_ALERT\_4\_G ALERTS Related to the use of SQUEEZE Suppressed !  
 PLAT912\_ALERT\_4\_G Missing # of FCF Reflections Above STh/L= 0.600 182  
 PLAT961\_ALERT\_5\_G Dataset Contains no Negative Intensities ..... !

- 0 **ALERT level A** = Most likely a serious problem - resolve or explain
  - 1 **ALERT level B** = A potentially serious problem, consider carefully
  - 5 **ALERT level C** = Check. Ensure it is not caused by an omission or oversight
  - 11 **ALERT level G** = General information/check it is not something unexpected
- 
- 5 ALERT type 1 CIF construction/syntax error, inconsistent or missing data
  - 6 ALERT type 2 Indicator that the structure model may be wrong or deficient
  - 1 ALERT type 3 Indicator that the structure quality may be low
  - 3 ALERT type 4 Improvement, methodology, query or suggestion
  - 2 ALERT type 5 Informative message, check

It is advisable to attempt to resolve as many as possible of the alerts in all categories. Often the minor alerts point to easily fixed oversights, errors and omissions in your CIF or refinement strategy, so attention to these fine details can be worthwhile. In order to resolve some of the more serious problems it may be necessary to carry out additional measurements or structure refinements. However, the purpose of your study may justify the reported deviations and the more serious of these should normally be commented upon in the discussion or experimental section of a paper or in the "special\_details" fields of the CIF. checkCIF was carefully designed to identify outliers and unusual parameters, but every test has its limitations and alerts that are not important in a particular case may appear. Conversely, the absence of alerts does not guarantee there are no aspects of the results needing attention. It is up to the individual to critically assess their own results and, if necessary, seek expert advice.

### **Publication of your CIF in IUCr journals**

A basic structural check has been run on your CIF. These basic checks will be run on all CIFs submitted for publication in IUCr journals (*Acta Crystallographica*, *Journal of Applied Crystallography*, *Journal of Synchrotron Radiation*); however, if you intend to submit to *Acta Crystallographica Section C* or *E*, you should make sure that full publication checks are run on the final version of your CIF prior to submission.

### **Publication of your CIF in other journals**

Please refer to the *Notes for Authors* of the relevant journal for any special instructions relating to CIF submission.

---

**PLATON version of 04/07/2012; check.def file version of 28/06/2012**

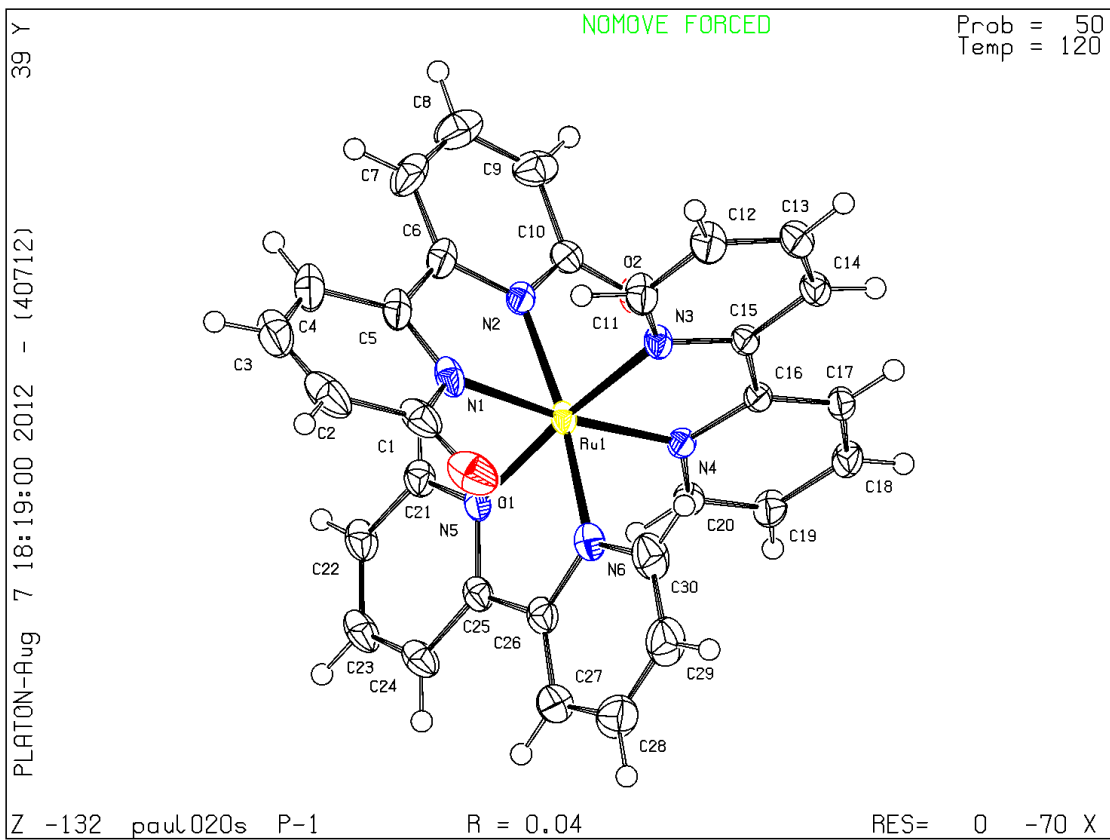

Supplement: NIHMS534305-supplement-05.pdf [file NIHMS534305-supplement-05.pdf]
