# Supplementary material
Source: PubMed Central journal article supplement (PMC3882005)
Supplement: NIHMS534305-supplement-01.pdf [file NIHMS534305-supplement-01.pdf]

## Supplementary Materials

### **Ruthenium Dihydroxybipyridine Complexes are Tumor Activated Prodrugs Due to Low pH and Blue Light Induced Ligand Release**

Kyle T. Hufziger,<sup>†</sup> Fathima Shazna Thowfeik,<sup>§</sup> David J. Charboneau,<sup>†</sup> Ismael Nieto,<sup>#</sup>  
William G. Dougherty,<sup>†</sup> W. Scott Kassel,<sup>†</sup> Timothy J. Dudley,<sup>‡</sup> Edward J. Merino,<sup>§</sup>  
Elizabeth T. Papish,<sup>#,‡,\*</sup> Jared J. Paul<sup>†,\*</sup>

<sup>†</sup>*Department of Chemistry, Villanova University, 800 Lancaster Ave., Villanova, Pennsylvania 19085*

<sup>§</sup>*Department of Chemistry, University of Cincinnati, 2600 Clifton Ave., Cincinnati, OH 45221*

<sup>#</sup>*Department of Chemistry, Drexel University, 3141 Chestnut St., Philadelphia, PA 19104*

<sup>‡</sup>*Math, Science and Technology Department, University of Minnesota, Crookston, 2900 University Ave., Crookston, MN 56716*

<sup>‡</sup>*Department of Chemistry, University of Alabama, 250 Hackberry Ln., Tuscaloosa, AL 35401*

## **Table of Contents**

IR Spectroscopy – page 3

NMR Spectroscopy – page 4

pH Titration – page 5

Electrochemistry – page 6

Absorbance Spectroscopy – pages 7-21

Kinetics of Ligand Loss – pages 22-26

Luminescence Spectroscopy – page 27

Crystallographic Data – pages 28-74

Computational Methods – pages 75-79

References – page 80

## IR Spectroscopy

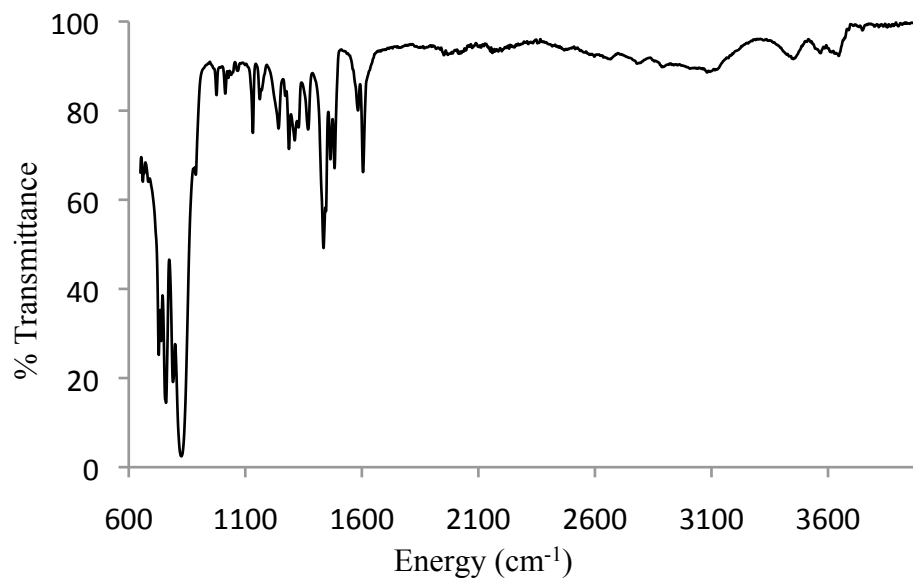

Figure S1 – FT-IR Spectrum of [Ru(bpy)<sub>2</sub>(66'bpy(OH)<sub>2</sub>)]<sup>2+</sup>[PF<sub>6</sub>]<sub>2</sub>.

## NMR Spectroscopy

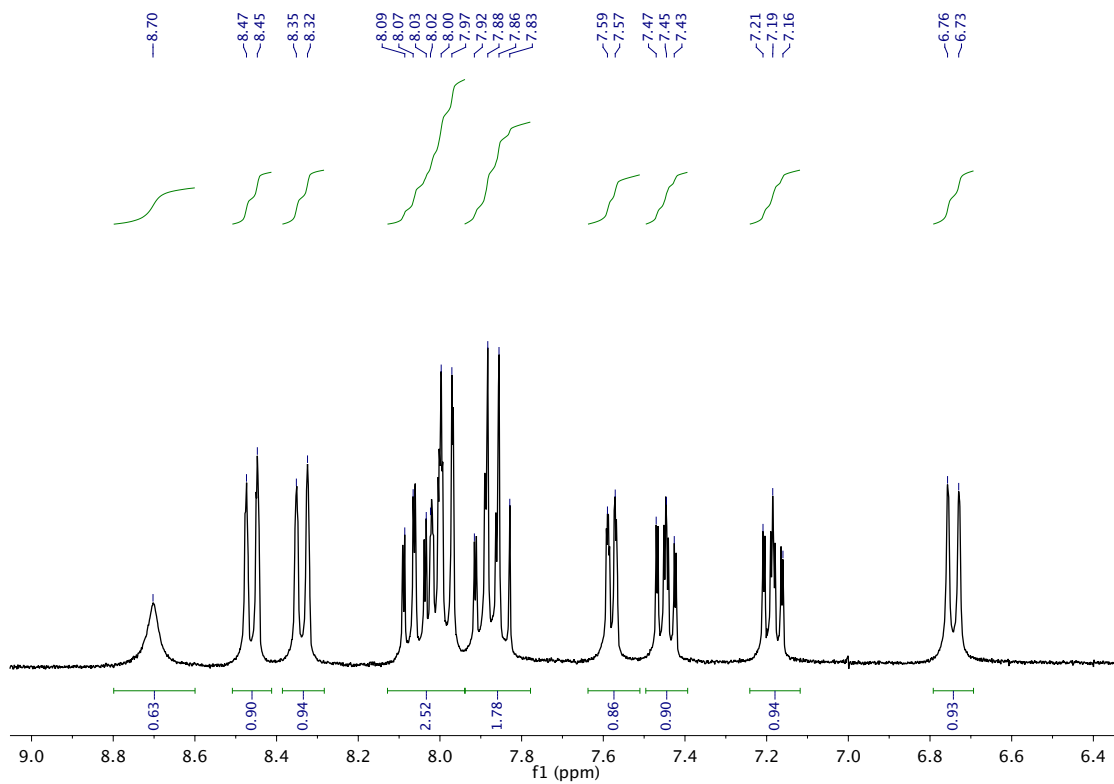

Figure S2 –  $^1\text{H-NMR}$  Spectrum of  $[\text{Ru}(\text{bpy})_2(66'\text{bpy}(\text{OH})_2)][\text{PF}_6]_2$  in  $\text{CD}_3\text{CN}$ .

## pH Titration

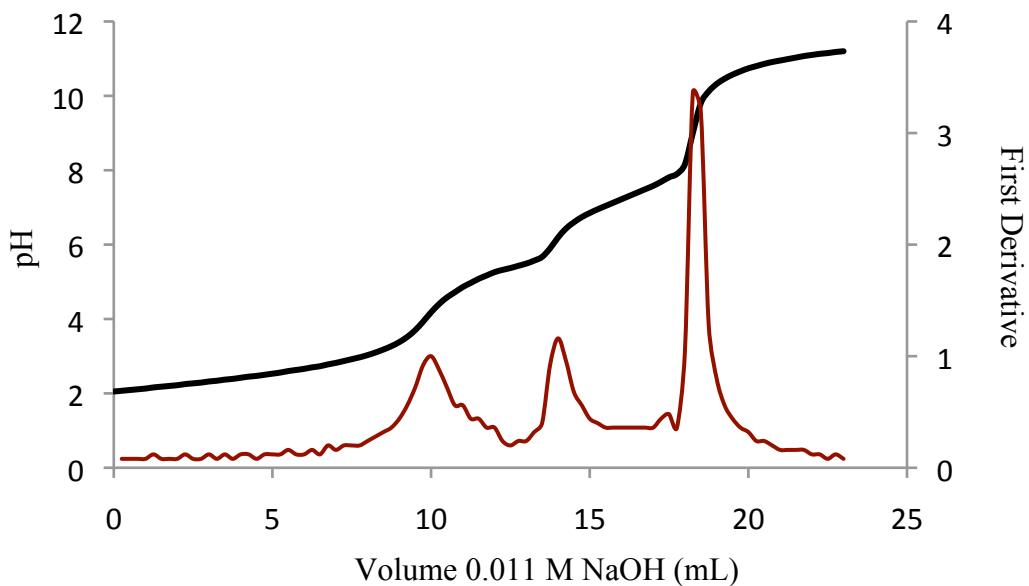

Figure S3 – pH Titration of 4.9 mM  $[\text{Ru}(\text{bpy})_2(66'\text{bpy}(\text{OH})_2)]^{2+}$  in 0.01 M HCl with 0.011 M NaOH at 25 °C. The first equivalence point is due to neutralization of the excess HCl used to ensure full protonation of the metal complex.

## Electrochemistry

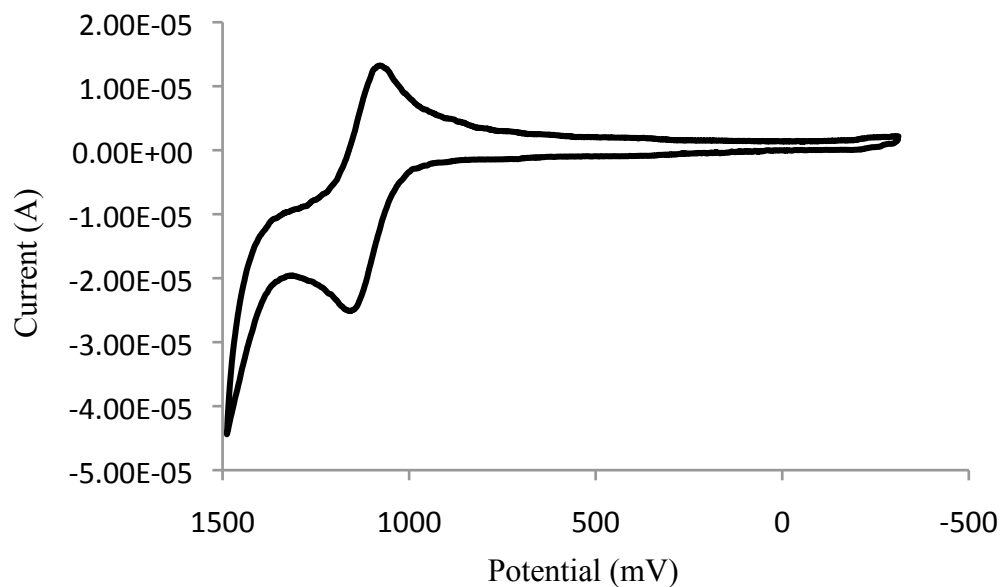

Figure S4 – Cyclic voltammogram (oxidative scan) of 1.3 mM  $[\text{Ru}(\text{bpy})_2(66'\text{bpy}(\text{OH})_2)]^{2+}$  in acetonitrile with 0.1M tetrabutylammonium hexafluorophosphate with glassy carbon working electrode at 25 °C. Scan rate was 200 mV/s. Potentials corrected vs. SCE.

## Absorbance Spectroscopy

UV/visible absorbance spectra were also collected in varying solvents. The solvents: acetonitrile, 1,2-dichloroethane, methanol, and ethanol were chosen for their varying dielectric constants and hydrogen bonding properties. The structure of the protonated form of the complex,  $[\text{Ru}(\text{bpy})_2(66'\text{bpy}(\text{OH})_2)]^{2+}$  are similar between solvents with  $\leq 5$  nm shifts for all corresponding peak maxima. For example, the lowest energy MLCT band appears at  $\lambda_{\text{max}} = 459$  nm in acetonitrile and 1,2-dichloroethane, and  $\lambda_{\text{max}} = 462$  nm in methanol. These small shifts were also observed for the protonated  $[\text{Ru}(\text{bpy})_2(44'\text{bpy}(\text{OH})_2)]^{2+}$  and also  $[\text{Ru}(\text{bpy})_3]^{2+}$ , lacking the hydroxyl groups.<sup>[1, 2]</sup>

More dramatic solvent effects were observed when the  $[\text{Ru}(\text{bpy})_2(66'\text{bpy}(\text{OH})_2)]^{2+}$  complex was deprotonated using tetrabutylammonium hydroxide. All peak maxima at wavelengths greater than 300 nm shift to the red upon deprotonation. As observed with  $[\text{Ru}(\text{bpy})_2(44'\text{bpy}(\text{OH})_2)]^{2+}$ , the extent of lowest energy MLCT band shift is a function of the combination of 1) hydrogen bonding ability and 2) dielectric constant of the solvent. The peak maxima for the lowest energy band shifts between protonated and deprotonated complex range from  $1900\text{ cm}^{-1}$  in water to  $3500\text{ cm}^{-1}$  in 1,2-dichloroethane. The hydrogen bonding solvents on average do not shift as greatly as the non-hydrogen bonding solvents. For the hydrogen bonding solvents, the  $\lambda_{\text{max}}$  of the lowest energy band scale with the dielectric constant of the solvent from ethanol ( $\lambda_{\text{max}} = 519$  nm) to methanol ( $\lambda_{\text{max}} = 513$  nm) to water ( $\lambda_{\text{max}} = 504$  nm). In general the non-hydrogen bonding solvents have larger shifts that are dependent upon the dielectric constant with  $\lambda_{\text{max}} = 546$  nm in 1,2-dichloroethane and  $\lambda_{\text{max}} = 543$  nm in acetonitrile. The largest shift is  $1500\text{ cm}^{-1}$  when comparing water to 1,2-dichloroethane and comparable to the  $1600\text{ cm}^{-1}$  shift observed from water to 1,2-dichloroethane in  $[\text{Ru}(\text{bpy})_2(44'\text{bpy}(\text{OH})_2)]^{2+}$ .<sup>[1]</sup> The hydrogen bonding solvents can interact with the deprotonated pyridinolate in the complex, resulting in less pyridinolate character of the complex, and therefore, less of a shift in wavelength.

The structure of the lowest energy MLCT of protonated complex,  $[\text{Ru}(\text{bpy})_2(66'\text{bpy}(\text{OH})_2)]^{2+}$ , reveals a major peak at 459 nm with a shoulder at 428 nm. This separation of  $\sim 1600\text{ cm}^{-1}$  is on the order of the separation observed for  $[\text{Ru}(44'\text{bpy}(\text{OH})_2)_3]^{2+}$  ( $\sim 1500\text{ cm}^{-1}$ ) and  $[\text{Ru}(\text{bpy})_2(44'\text{bpy}(\text{OH})_2)]^{2+}$  ( $\sim 1400\text{ cm}^{-1}$ ).<sup>[1, 3]</sup> Upon deprotonation of  $[\text{Ru}(\text{bpy})_2(66'\text{bpy}(\text{OH})_2)]^{2+}$  in acetonitrile, there appears to be two peaks, one at 543 nm and another at 480 nm, corresponding to  $2400\text{ cm}^{-1}$  peak to peak separation. The deprotonated  $[\text{Ru}(\text{bpy})_2(44'\text{bpy}(\text{O}^-)_2)]$  complex has similar band structure with a peak to peak separation of  $2500\text{ cm}^{-1}$  in acetonitrile. Of note is that the structure of the more highly symmetrical deprotonated  $[\text{Ru}(44'\text{bpy}(\text{O}^-)_2)_3]^{4-}$  complex does not change significantly from the protonated complex.<sup>[3]</sup> This observation is due to the divergence of types of electronic transitions occurring in the varying complexes during deprotonation, discussed in the computation section of the manuscript.

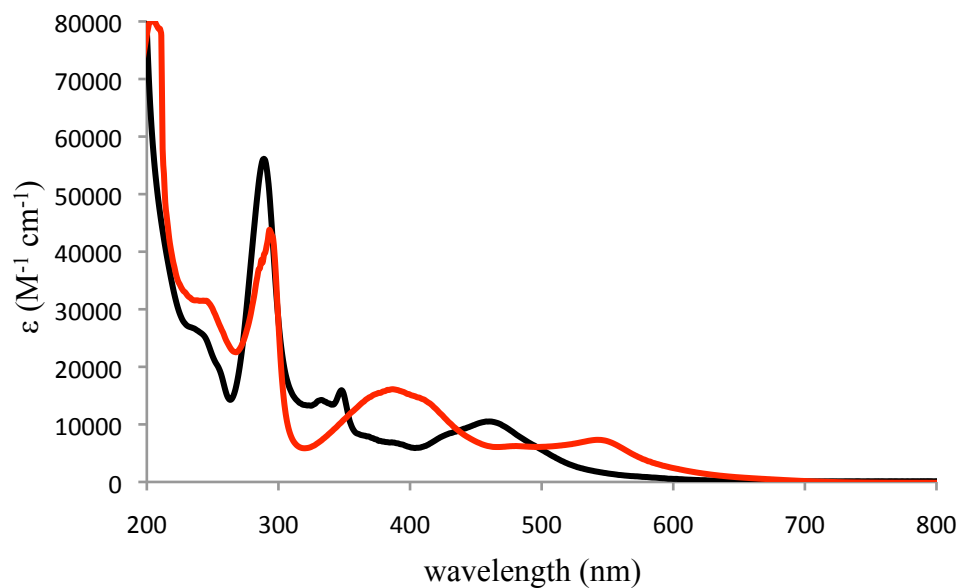

Figure S5 – UV/Visible spectrum of (black line) protonated  $[\text{Ru}(\text{bpy})_2(66'\text{bpy}(\text{OH})_2)]^{2+}$  and (red line) deprotonated  $[\text{Ru}(\text{bpy})_2(66'\text{bpy}(\text{O}^-)_2)]$  in acetonitrile solvent at 25 °C.

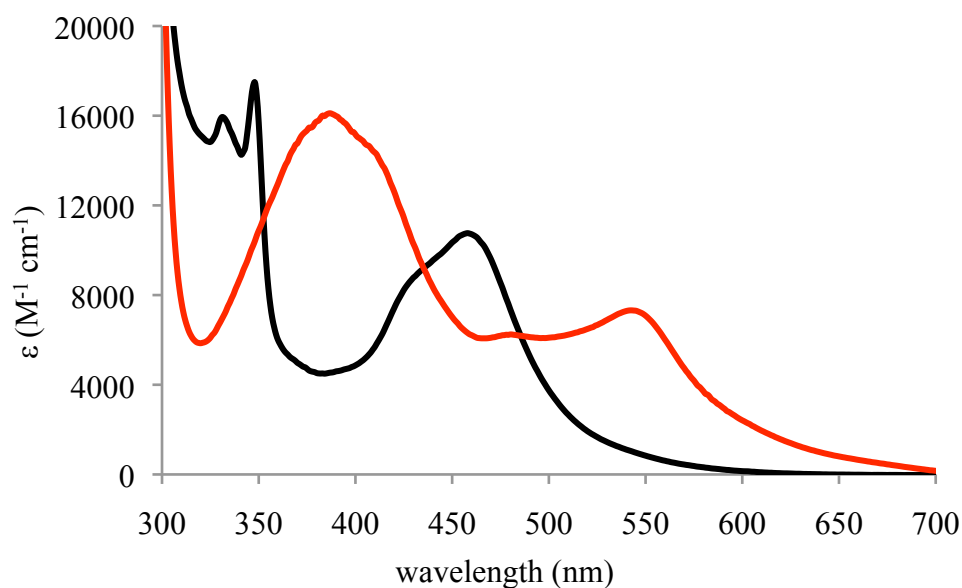

Figure S6 – UV/Visible spectrum of (black line)  $[\text{Ru}(\text{bpy})_2(66'\text{bpy}(\text{OH})_2)]^{2+}$  and (red line)  $[\text{Ru}(\text{bpy})_2(66'\text{bpy}(\text{O}^-)_2)]$  in acetonitrile at 25 °C.



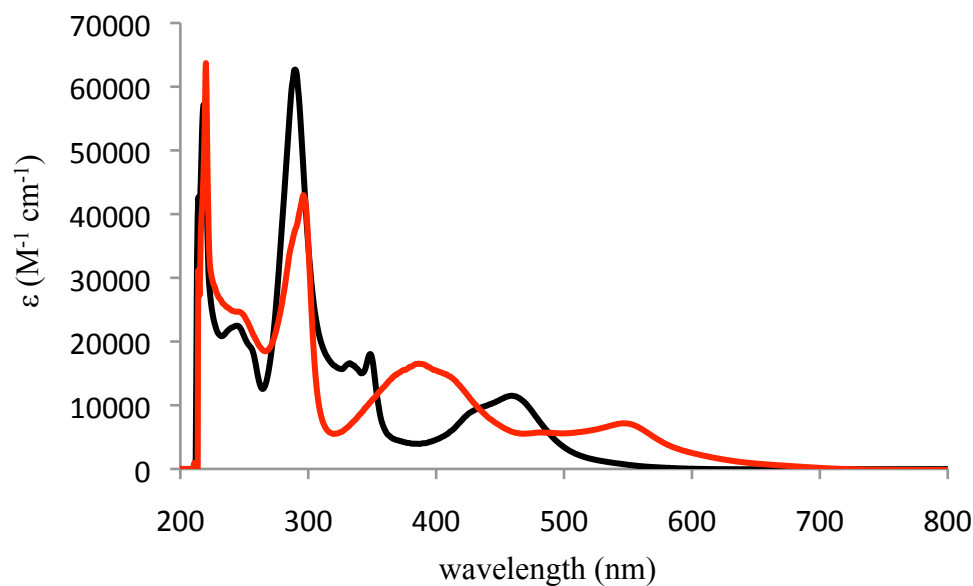

Figure S7 – UV/Visible spectrum of (black line) protonated  $[Ru(bpy)_2(66'bpy(OH)_2)]^{2+}$  and (red line) deprotonated  $[Ru(bpy)_2(66'bpy(O^-)_2)]$  in 1,2-dichloroethane solvent at 25 °C.

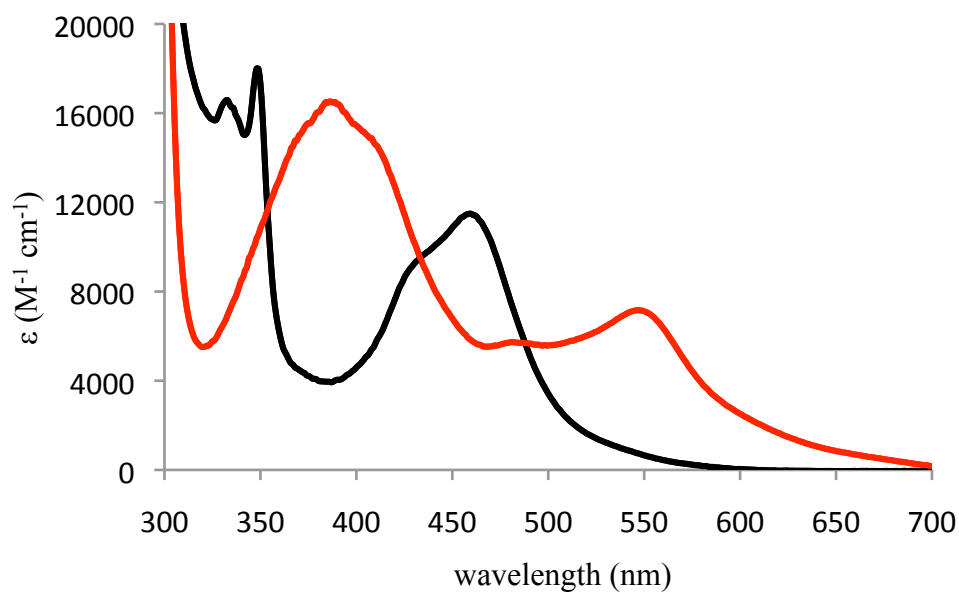

Figure S8 – UV/Visible spectrum of (black line) protonated  $[Ru(bpy)_2(66'bpy(OH)_2)]^{2+}$  and (red line) deprotonated  $[Ru(bpy)_2(66'bpy(O^-)_2)]$  in 1,2-dichloroethane solvent at 25 °C.

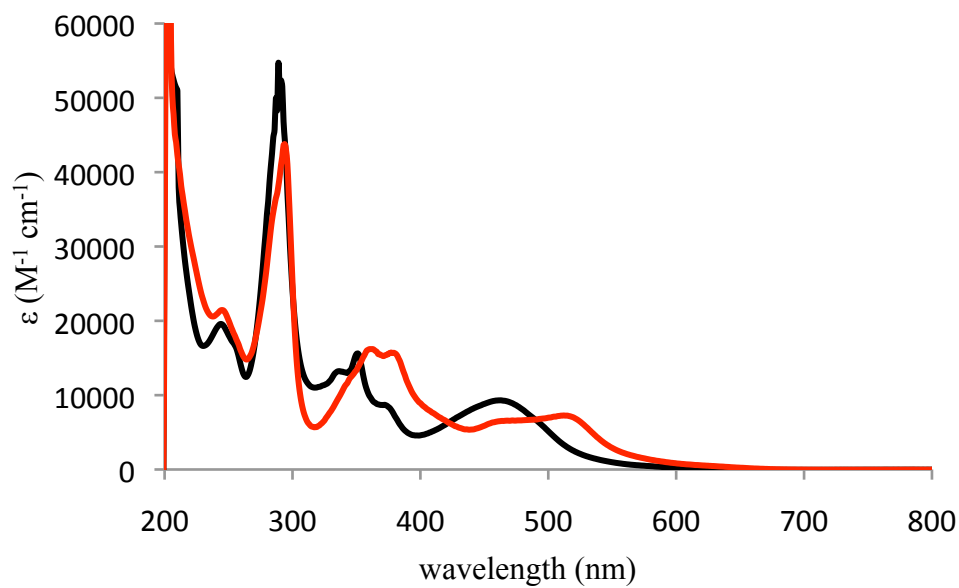

Figure S9 – UV/Visible spectrum of (black line) protonated  $[\text{Ru}(\text{bpy})_2(66'\text{bpy}(\text{OH})_2)]^{2+}$  and (red line) deprotonated  $[\text{Ru}(\text{bpy})_2(66'\text{bpy}(\text{O}^-)_2)]$  in methanol solvent at 25 °C.

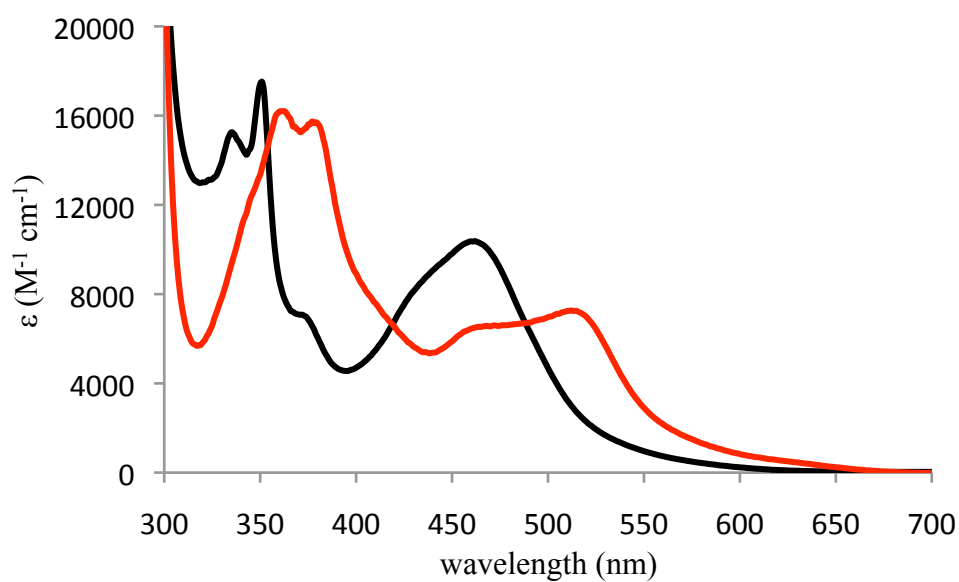

Figure S10 – UV/Visible spectrum of (black line) protonated  $[\text{Ru}(\text{bpy})_2(66'\text{bpy}(\text{OH})_2)]^{2+}$  and (red line) deprotonated  $[\text{Ru}(\text{bpy})_2(66'\text{bpy}(\text{O}^-)_2)]$  in methanol solvent at 25 °C.

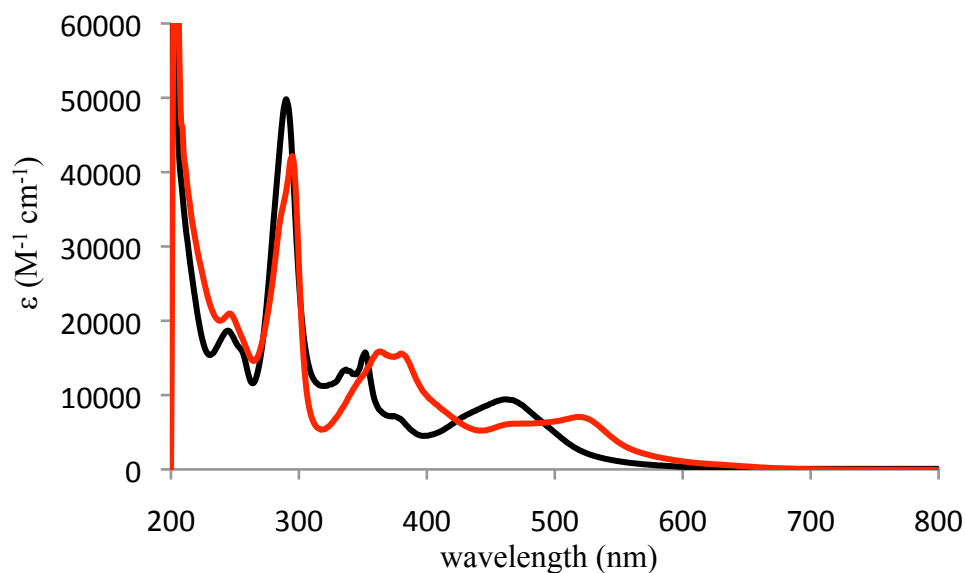

Figure S11 – UV/Visible spectrum of (black line) protonated  $[\text{Ru}(\text{bpy})_2(66'\text{bpy}(\text{OH})_2)]^{2+}$  and (red line) deprotonated  $[\text{Ru}(\text{bpy})_2(66'\text{bpy}(\text{O}^-)_2)]$  in ethanol solvent at 25 °C.

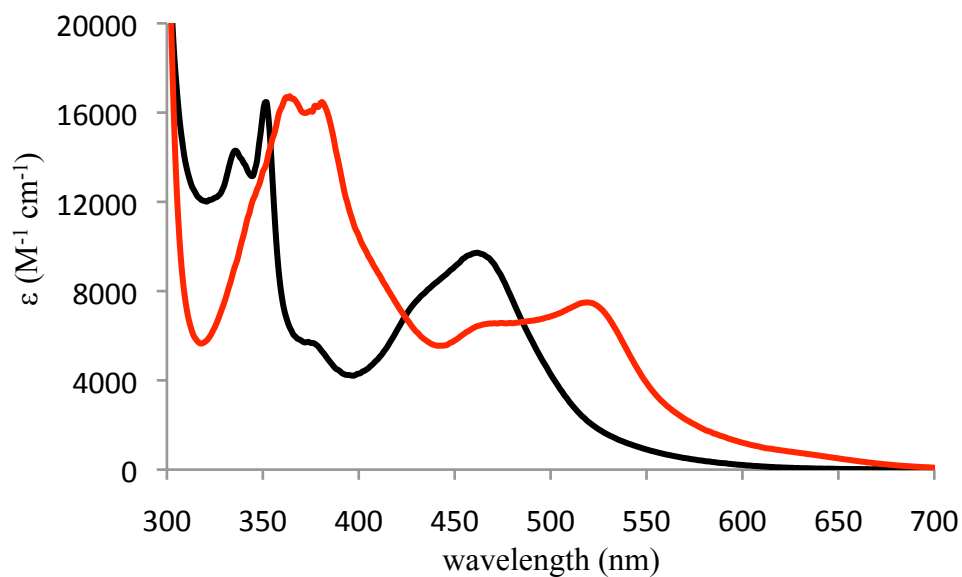

Figure S12 – UV/Visible spectrum of (black line) protonated  $[\text{Ru}(\text{bpy})_2(66'\text{bpy}(\text{OH})_2)]^{2+}$  and (red line) deprotonated  $[\text{Ru}(\text{bpy})_2(66'\text{bpy}(\text{O}^-)_2)]$  in ethanol solvent at 25 °C.

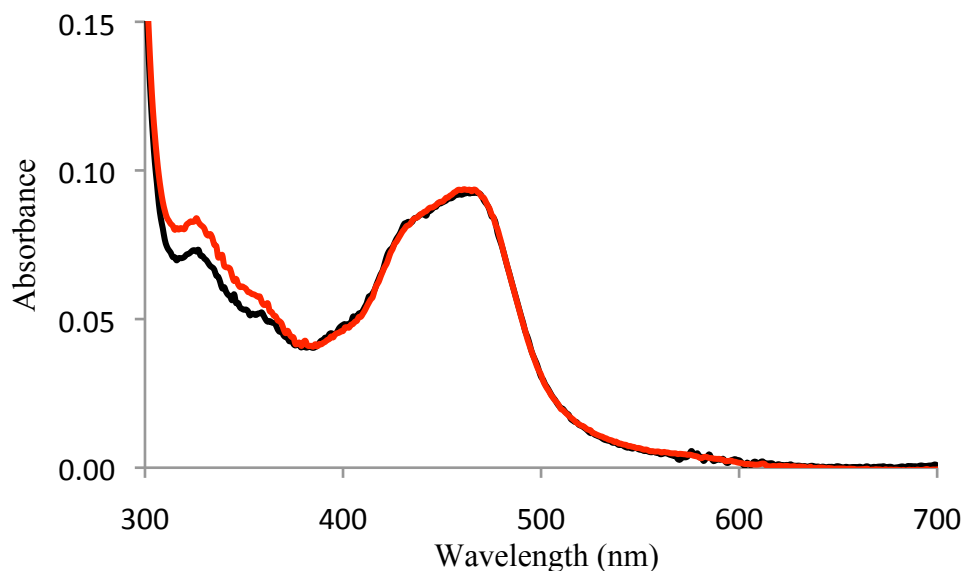

Figure S13 – UV/Visible spectrum of  $8.3 \mu\text{M}$   $[\text{Ru}(\text{bpy})_2(44'\text{bpy}(\text{OH})_2)]^{2+}$  in  $0.1 \text{ M HCl}$  and  $1:1$  mixture acetonitrile:water (black) before luminescence studies and (red) after luminescence studies at  $25 \text{ }^\circ\text{C}$ . Demonstrates that no photodecomposition is occurring during the experiment timeframe.

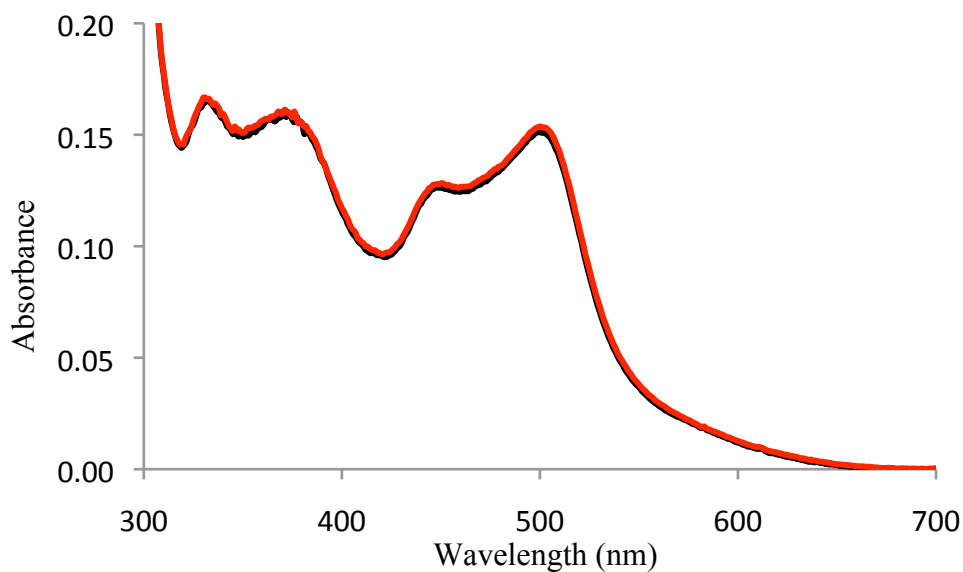

Figure S14 – UV/Visible spectrum of  $17 \mu\text{M}$   $[\text{Ru}(\text{bpy})_2(44'\text{bpy}(\text{O}^-)_2)]$  in  $0.1 \text{ M NaOH}$  and  $1:1$  mixture acetonitrile:water (black) before luminescence studies and (red) after luminescence studies at  $25 \text{ }^\circ\text{C}$ . Demonstrates that no photodecomposition is occurring during the experiment timeframe.

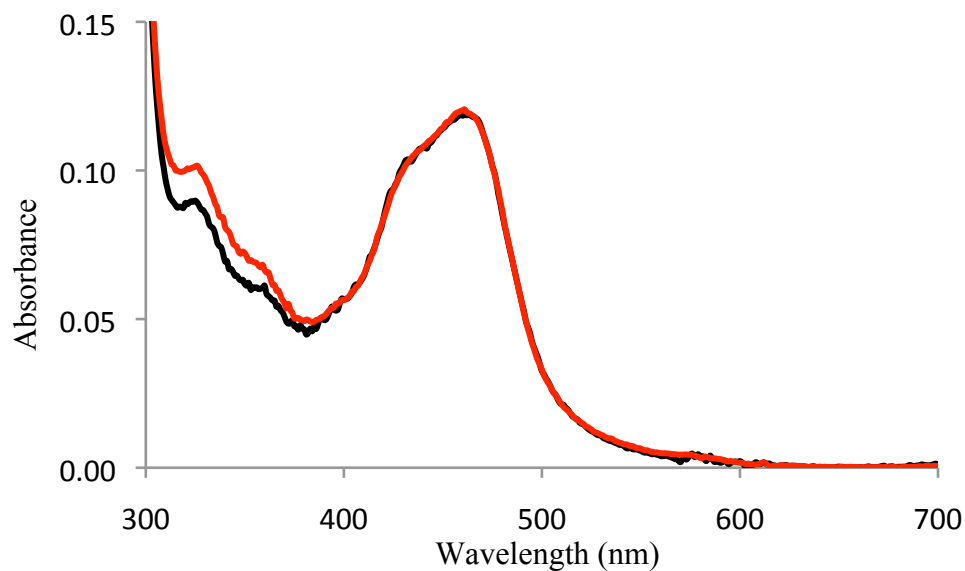

Figure S15 – UV/Visible spectrum of 9.1  $\mu\text{M}$   $[\text{Ru}(\text{bpy})_2(44'\text{bpy}(\text{OMe})_2)]^{2+}$  in 0.1 M HCl and 1:1 mixture acetonitrile:water (black) before luminescence studies and (red) after luminescence studies at 25  $^\circ\text{C}$ . Demonstrates that no photodecomposition is occurring during the experiment timeframe.

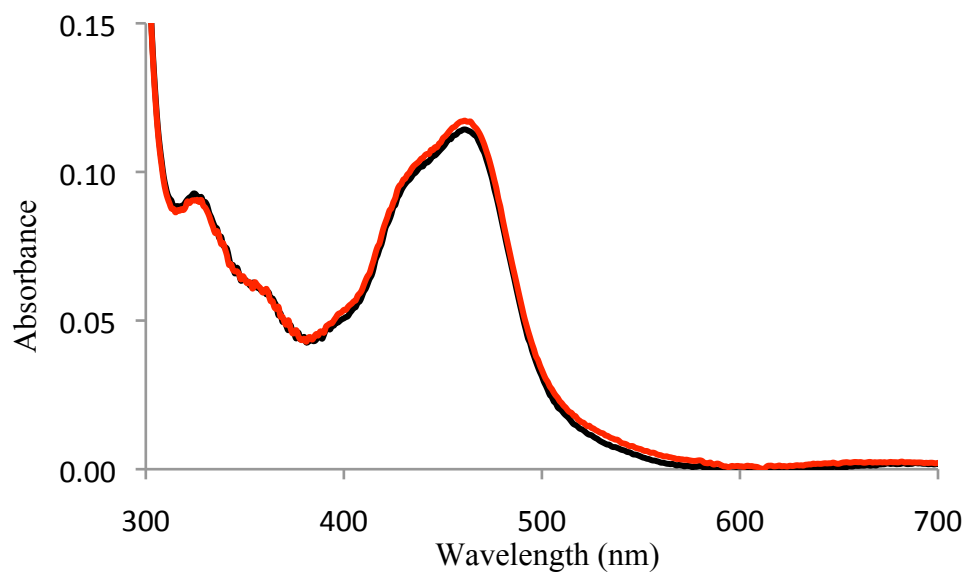

Figure S16 – UV/Visible spectrum of 9.1  $\mu\text{M}$   $[\text{Ru}(\text{bpy})_2(44'\text{bpy}(\text{OMe})_2)]^{2+}$  in 0.1 M NaOH and 1:1 mixture acetonitrile:water (black) before luminescence studies and (red) after luminescence studies at 25  $^\circ\text{C}$ . Demonstrates that no photodecomposition is occurring during the experiment timeframe.

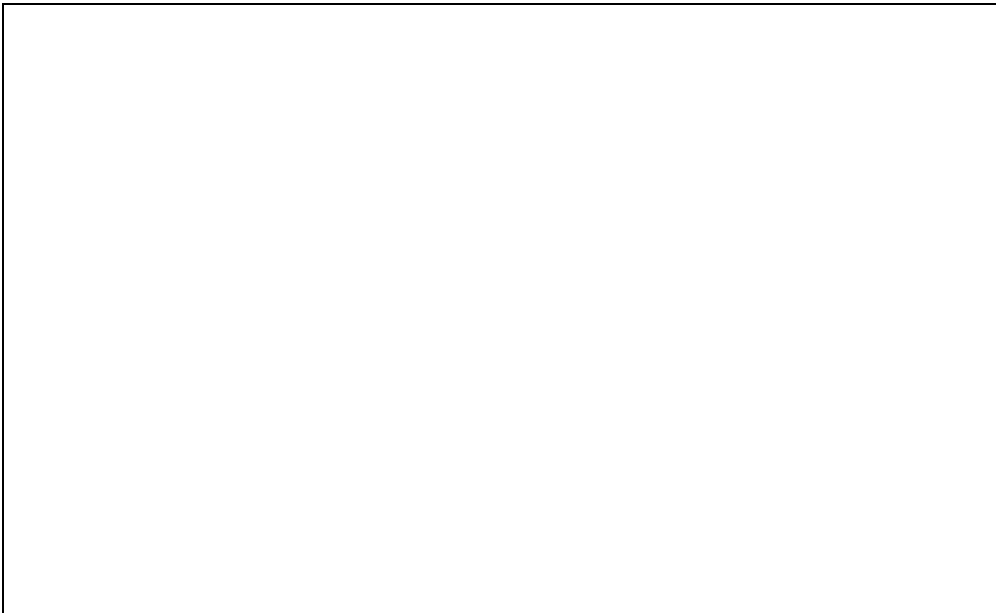

Figure S17 – UV/Visible spectrum of  $8.9 \mu\text{M} [\text{Ru}(\text{bpy})_2(66'\text{bpy}(\text{OH})_2)]^{2+}$  in  $0.1 \text{ M HCl}$  and  $1:1$  mixture acetonitrile:water (black) before luminescence studies and (red) after luminescence studies at  $25 \text{ }^\circ\text{C}$ . Demonstrates that photodecomposition is occurring during the experiment timeframe.

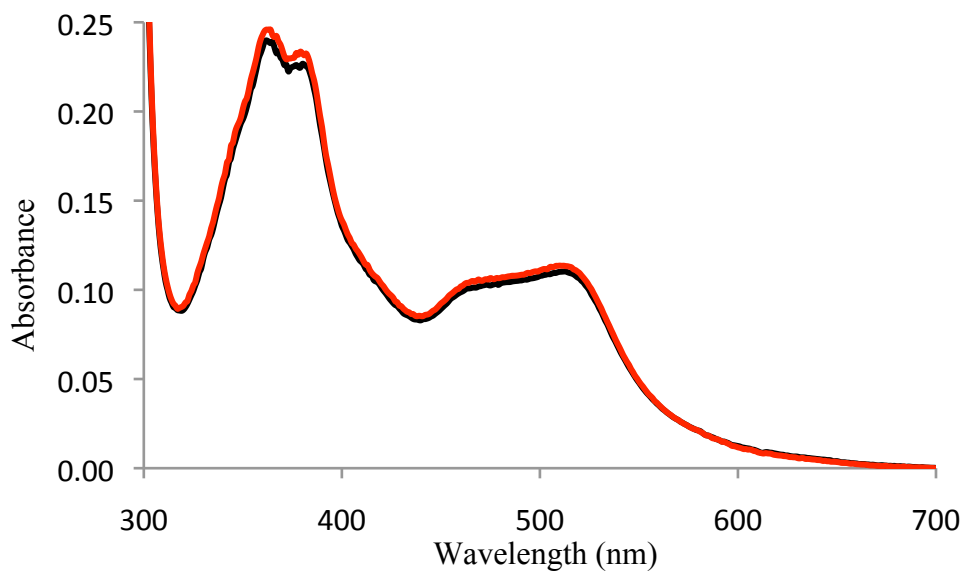

Figure S18 – UV/Visible spectrum of  $14 \mu\text{M} [\text{Ru}(\text{bpy})_2(66'\text{bpy}(\text{OH})_2)]^{2+}$  in  $0.1 \text{ M NaOH}$  and  $1:1$  mixture acetonitrile:water (black) before luminescence studies and (red) after luminescence studies at  $25 \text{ }^\circ\text{C}$ . Demonstrates that no photodecomposition is occurring during the experiment timeframe.

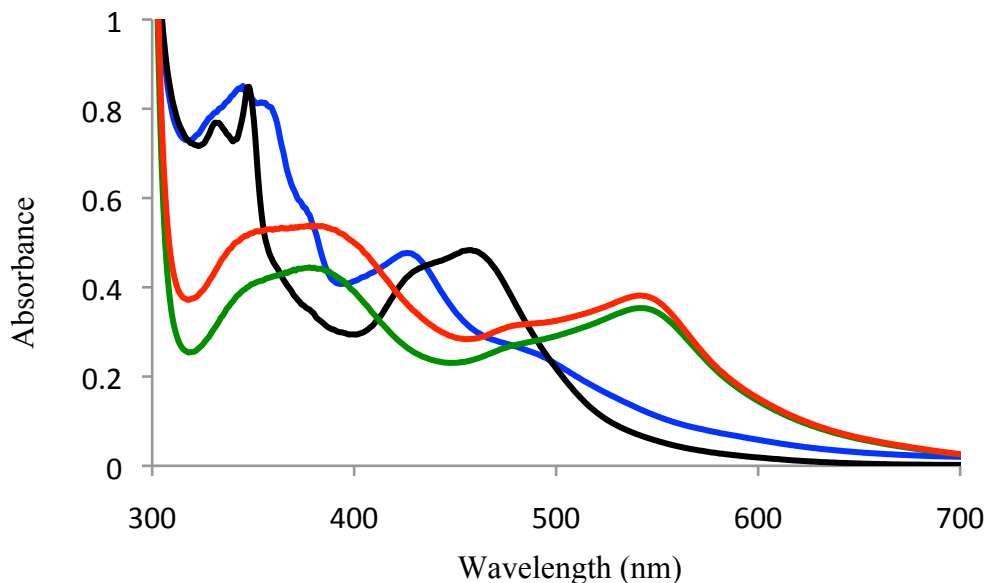

Figure S19 - UV/Visible spectrum of (black line) protonated 50  $\mu\text{M}$   $[\text{Ru}(\text{bpy})_2(66'\text{bpy}(\text{OH})_2)]^{2+}$  kept in dark, (blue line) protonated 50  $\mu\text{M}$   $[\text{Ru}(\text{bpy})_2(66'\text{bpy}(\text{OH})_2)]^{2+}$  kept in light, (red line) deprotonated 50  $\mu\text{M}$   $[\text{Ru}(\text{bpy})_2(66'\text{bpy}(\text{O}^-)_2)]$  kept in dark, and (green line) deprotonated 50  $\mu\text{M}$   $[\text{Ru}(\text{bpy})_2(66'\text{bpy}(\text{O}^-)_2)]$  kept in light. All data collected in acetonitrile solvent at 25  $^\circ\text{C}$  and spectra collected after 18 days in solution.

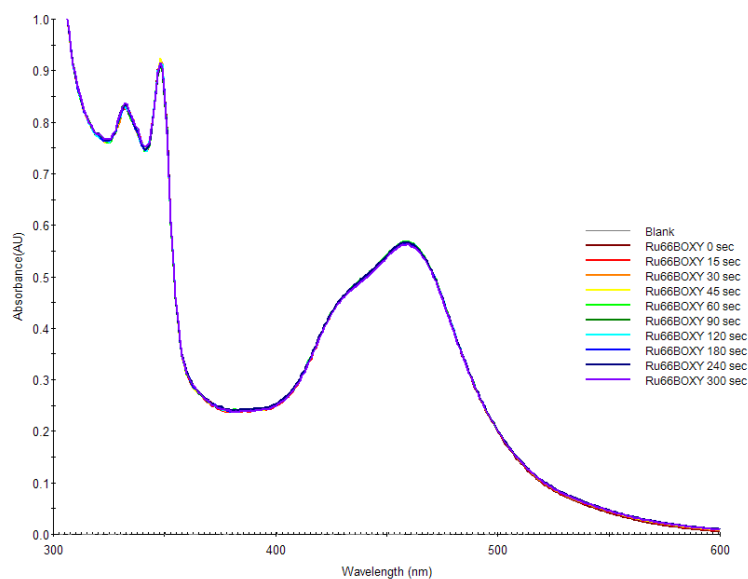

Figure S20 – UV/Visible spectra of protonated 50  $\mu\text{M}$   $[\text{Ru}(\text{bpy})_2(66'\text{bpy}(\text{OH})_2)]^{2+}$  irradiated with 720 nm red light from 0 to 5 minutes in acetonitrile solvent at 25  $^\circ\text{C}$ .

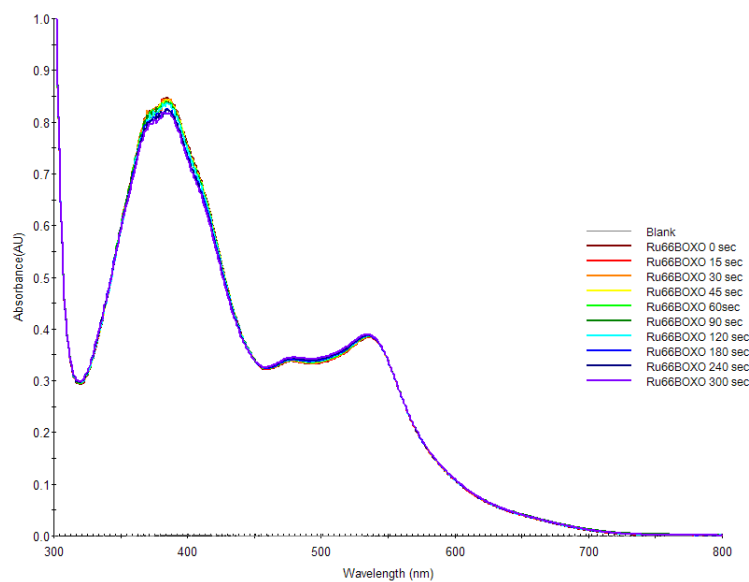

Figure S21 – UV/Visible spectra of deprotonated 50  $\mu\text{M}$   $[\text{Ru}(\text{bpy})_2(66'\text{bpy}(\text{O}^-)_2)]$  irradiated with 720 nm red light from 0 to 5 minutes in acetonitrile solvent at 25  $^\circ\text{C}$ .

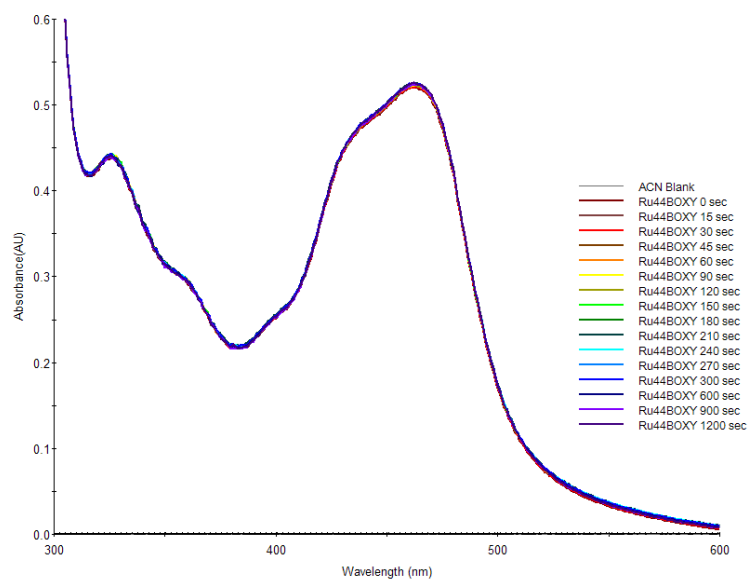

Figure S22 – UV/Visible spectra of protonated 50  $\mu\text{M}$   $[\text{Ru}(\text{bpy})_2(44'\text{bpy}(\text{OH})_2)]^{2+}$  irradiated with 450 nm blue light from 0 to 20 minutes in acetonitrile solvent at 25  $^\circ\text{C}$ .



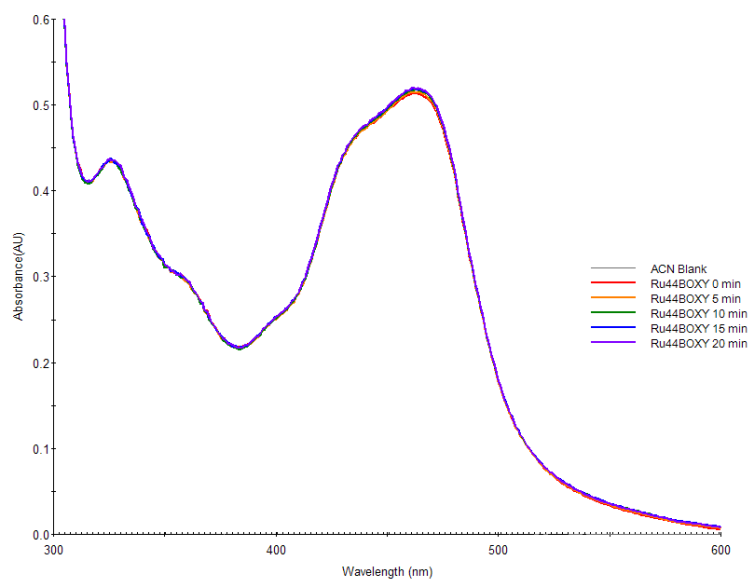

Figure S23 – UV/Visible spectra of protonated 50  $\mu\text{M}$   $[\text{Ru}(\text{bpy})_2(44'\text{bpy}(\text{OH})_2)]^{2+}$  irradiated with 720 nm red light from 0 to 20 minutes in acetonitrile solvent at 25  $^\circ\text{C}$ .

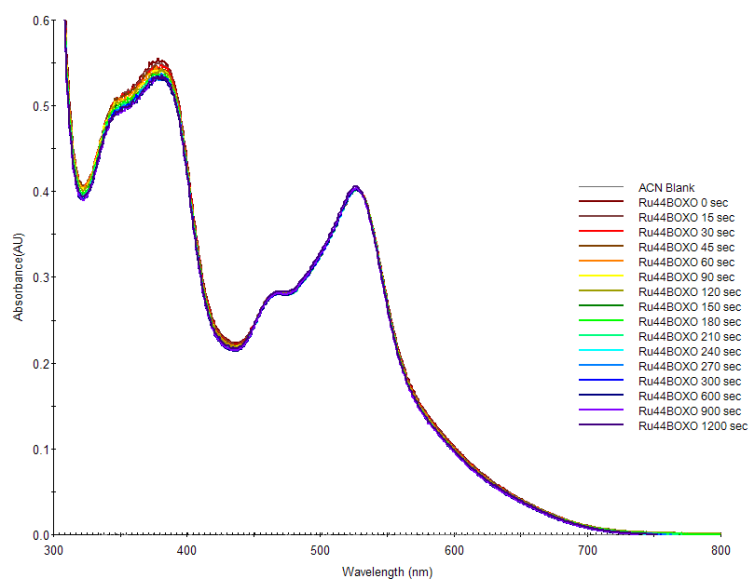

Figure S24 – UV/Visible spectra of deprotonated 50  $\mu\text{M}$   $[\text{Ru}(\text{bpy})_2(44'\text{bpy}(\text{O}^-)_2)]$  irradiated with 450 nm blue light from 0 to 20 minutes in acetonitrile solvent at 25  $^\circ\text{C}$ .

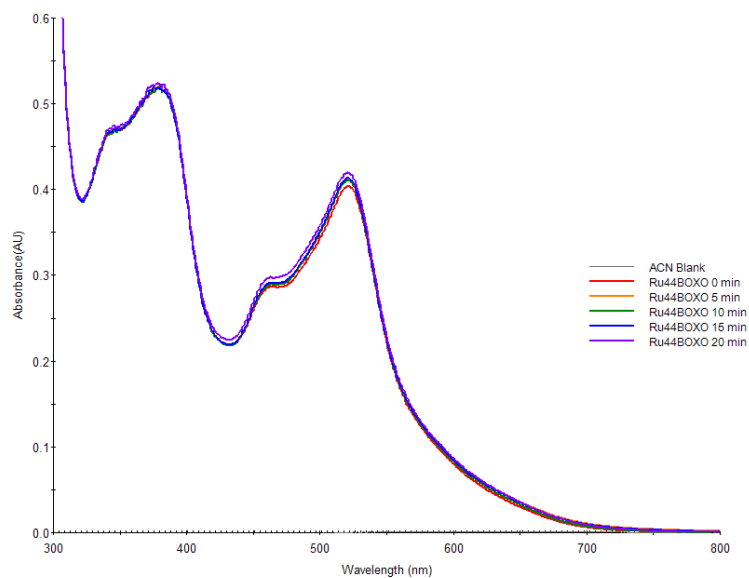

Figure S25 – UV/Visible spectra of deprotonated 50  $\mu\text{M}$   $[\text{Ru}(\text{bpy})_2(44'\text{bpy}(\text{O}^-)_2)]$  irradiated with 720 nm red light from 0 to 20 minutes in acetonitrile solvent at 25  $^\circ\text{C}$ .

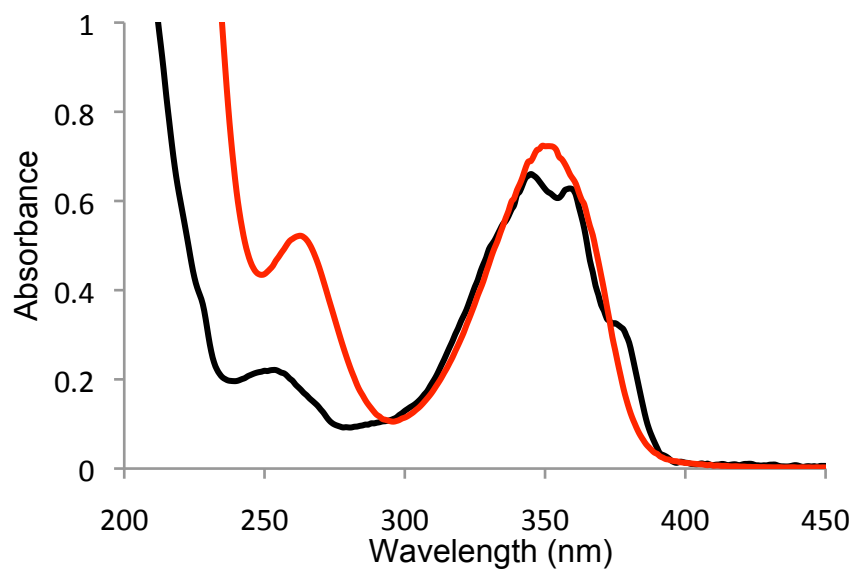

Figure S26 – UV/Visible spectra of (black line) protonated 50  $\mu\text{M}$  66'bpy(OH)<sub>2</sub> ligand and (red line) deprotonated 50  $\mu\text{M}$  66'bpy(O<sup>-</sup>)<sub>2</sub> in acetonitrile solvent. A 20:1 mole ratio of tetrabutylammonium hydroxide to ligand was used to deprotonate the ligand at 25  $^\circ\text{C}$ .

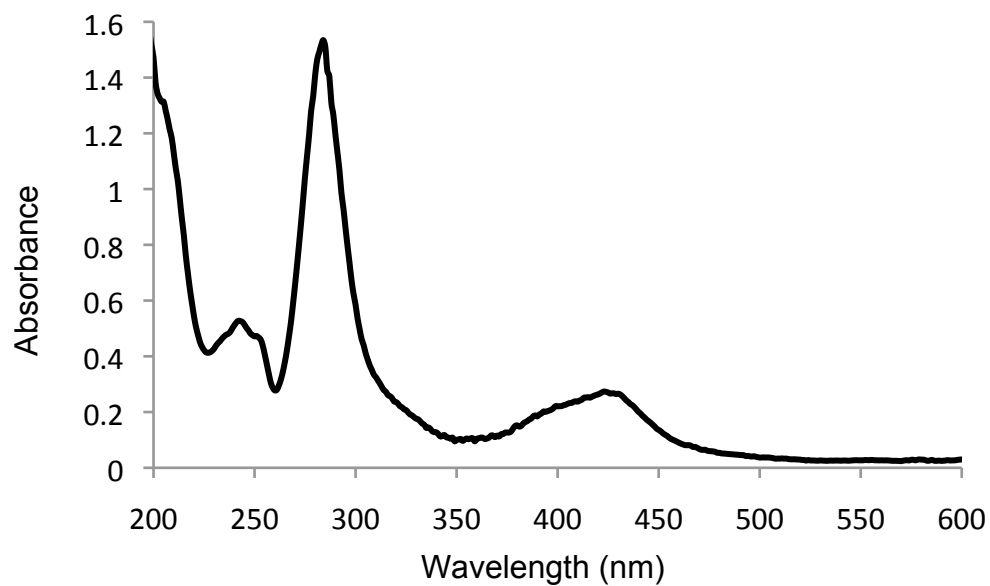

Figure S27 – UV/Visible spectrum of 25 μM [Ru(bpy)<sub>2</sub>(CH<sub>3</sub>CN)<sub>2</sub>]<sup>2+</sup> in acetonitrile solvent at 25 °C.

Table S1. UV/Visible Absorption Data for Protonated  $[\text{Ru}(\text{bpy})_2(66'\text{bpy}(\text{OH})_2)]^{2+}$  and Deprotonated  $[\text{Ru}(\text{bpy})_2(66'\text{bpy}(\text{O}^-)_2)]$  in acetonitrile.

| energy (eV) | protonated     |                                               | energy (eV) | deprotonated   |                                               |
|-------------|----------------|-----------------------------------------------|-------------|----------------|-----------------------------------------------|
|             | $\lambda$ (nm) | $\epsilon$ ( $\text{M}^{-1} \text{cm}^{-1}$ ) |             | $\lambda$ (nm) | $\epsilon$ ( $\text{M}^{-1} \text{cm}^{-1}$ ) |
| 5.061       | 245            | 20300                                         | 5.020       | 247            | 24300                                         |
| 4.305       | 288            | 63700                                         | 4.217       | 294            | 43700                                         |
| 3.746       | 331            | 17500                                         | 3.195       | 388            | 17100                                         |
| 3.563       | 348            | 19400                                         | 3.024       | 410(sh)        | 14900                                         |
| 2.897       | 428(sh)        | 9010                                          | 2.583       | 480            | 6480                                          |
| 2.701       | 459            | 11200                                         | 2.283       | 543            | 7580                                          |

Table S2. UV/Visible Absorption Data for Protonated  $[\text{Ru}(\text{bpy})_2(66'\text{bpy}(\text{OH})_2)]^{2+}$  and Deprotonated  $[\text{Ru}(\text{bpy})_2(66'\text{bpy}(\text{O}^-)_2)]$  in 1,2-dichloroethane.

| energy (eV) | protonated     |                                               | energy (eV) | deprotonated   |                                               |
|-------------|----------------|-----------------------------------------------|-------------|----------------|-----------------------------------------------|
|             | $\lambda$ (nm) | $\epsilon$ ( $\text{M}^{-1} \text{cm}^{-1}$ ) |             | $\lambda$ (nm) | $\epsilon$ ( $\text{M}^{-1} \text{cm}^{-1}$ ) |
| 5.061       | 245            | 19900                                         | 5.040       | 246            | 27500                                         |
| 4.881       | 254(sh)        | 18600                                         | 4.189       | 296            | 43000                                         |
| 4.275       | 290            | 63000                                         | 3.212       | 386            | 18700                                         |
| 3.734       | 332            | 17300                                         | 3.009       | 412(sh)        | 15800                                         |
| 3.563       | 348            | 19400                                         | 2.271       | 546            | 8070                                          |
| 2.890       | 429(sh)        | 9290                                          |             |                |                                               |
| 2.701       | 459            | 11700                                         |             |                |                                               |

Table S3. UV/Visible Absorption Data for Protonated  $[\text{Ru}(\text{bpy})_2(66'\text{bpy}(\text{OH})_2)]^{2+}$  and Deprotonated  $[\text{Ru}(\text{bpy})_2(66'\text{bpy}(\text{O}^-)_2)]$  in methanol.

| energy (eV) | protonated     |                                               | energy (eV) | deprotonated   |                                               |
|-------------|----------------|-----------------------------------------------|-------------|----------------|-----------------------------------------------|
|             | $\lambda$ (nm) | $\epsilon$ ( $\text{M}^{-1} \text{cm}^{-1}$ ) |             | $\lambda$ (nm) | $\epsilon$ ( $\text{M}^{-1} \text{cm}^{-1}$ ) |
| 5.081       | 244            | 21000                                         | 5.061       | 245            | 22000                                         |
| 4.881       | 254(sh)        | 19600                                         | 4.232       | 293            | 46000                                         |
| 4.246       | 292            | 46200                                         | 3.425       | 362            | 17100                                         |
| 3.690       | 336            | 18000                                         | 3.271       | 379            | 16500                                         |
| 3.532       | 351            | 19300                                         | 2.672       | 464            | 6710                                          |
| 3.306       | 375(sh)        | 4960                                          | 2.417       | 513            | 7480                                          |
| 2.863       | 433(sh)        | 9740                                          |             |                |                                               |
| 2.684       | 462            | 11800                                         |             |                |                                               |

Table S4. UV/Visible Absorption Data for Protonated  $[\text{Ru}(\text{bpy})_2(66'\text{bpy}(\text{OH})_2)]^{2+}$  and Deprotonated  $[\text{Ru}(\text{bpy})_2(66'\text{bpy}(\text{O}^-)_2)]$  in ethanol.

| protonated  |                |                                               | deprotonated |                |                                               |
|-------------|----------------|-----------------------------------------------|--------------|----------------|-----------------------------------------------|
| energy (eV) | $\lambda$ (nm) | $\epsilon$ ( $\text{M}^{-1} \text{cm}^{-1}$ ) | energy (eV)  | $\lambda$ (nm) | $\epsilon$ ( $\text{M}^{-1} \text{cm}^{-1}$ ) |
| 5.061       | 245            | 19900                                         | 5.040        | 246            | 22200                                         |
| 4.881       | 254(sh)        | 17400                                         | 4.217        | 294            | 42000                                         |
| 4.275       | 290            | 53300                                         | 3.416        | 363            | 17000                                         |
| 3.690       | 336            | 17200                                         | 3.263        | 380            | 17100                                         |
| 3.522       | 352            | 19900                                         | 2.661        | 466            | 6600                                          |
| 3.297       | 376(sh)        | 3810                                          | 2.389        | 519            | 7510                                          |
| 2.877       | 431            | 8660                                          |              |                |                                               |
| 2.689       | 461            | 10800                                         |              |                |                                               |

## Kinetics of Ligand Loss

**Studies in Acetonitrile: 1. Neutral conditions.** The conversion of  $[\text{Ru}(\text{bpy})_2(66'\text{bpy}(\text{OH})_2)]^{2+}$  to  $[\text{Ru}(\text{bpy})_2(\text{CH}_3\text{CN})_2]^{2+}$  in acetonitrile upon irradiation with blue light was fit as an  $A \rightarrow B$  process at 457 nm. The extinction coefficients were measured as follows at 457 nm:

$$\epsilon_A = 11,300 \text{ M}^{-1}\text{cm}^{-1}$$

$$\epsilon_B = 4,500 \text{ M}^{-1}\text{cm}^{-1}$$

The concentration of B as a function of time,  $[\text{B}]_t$ , was calculated as such in excel:

$$[\text{B}]_t = (A_{457\text{nm}} - (\epsilon_A \times [\text{A}]_0)) / (\epsilon_B - \epsilon_A) \quad (1)$$

The above equation (1) results from solving the two equations below for  $[\text{B}]_t$ :

$$[\text{A}]_t + [\text{B}]_t = [\text{A}]_0 \quad (2)$$

$$A_{457\text{nm}} = [\text{A}]_t \times \epsilon_A + [\text{B}]_t \times \epsilon_B \quad (3)$$

The results of this analysis are shown in Figure S28. The first order ( $\ln([\text{B}]_t)$  vs. time) and second order ( $(1/[\text{B}]_t)$  vs. time) plots gave curved plots in all time regimes, rather than linear results, and thus initial rate constants dependent on  $[\text{A}]_t$  or  $[\text{A}]_t^2$  were ruled out.

a) Zero Order Plot, Initial Growth of [B]

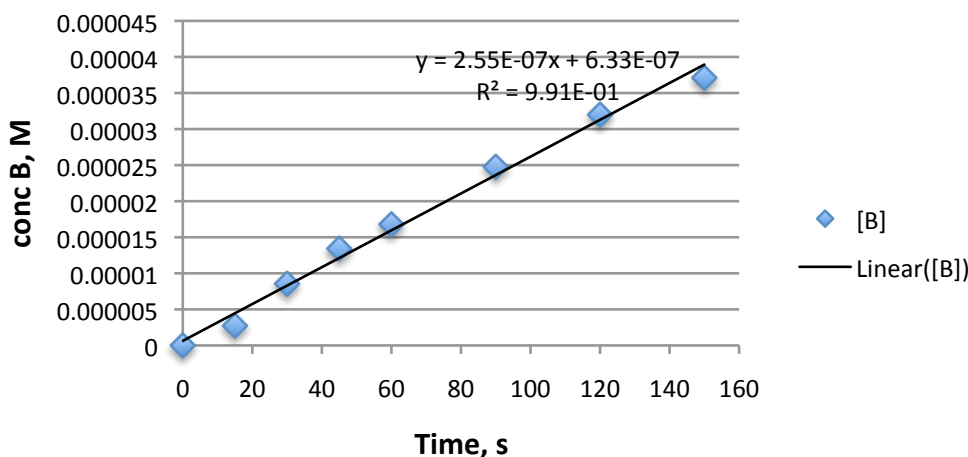

b) Zero Order Plot, 20 min Growth of [B]

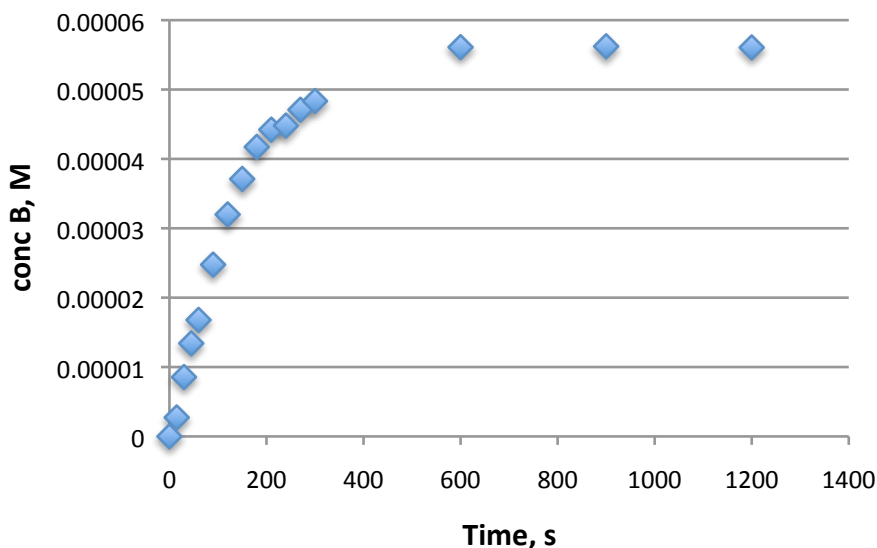

Figure S28 - Zero order plot of concentration of B,  $[\text{Ru}(\text{bpy})_2(\text{CH}_3\text{CN})_2]^{2+}$ , as a function of time. Part a) Shows the initial rise, which was used to calculate an initial rate constant,  $k_{\text{obs}} = 2.6 \times 10^{-7}$  M/s. Part b) show the long term growth of the product.

**Studies in Acetonitrile: 2. Basic Conditions.** Similarly, we attempted to study the photo-dissociation of  $[\text{Ru}(\text{bpy})_2(66'\text{bpy}(\text{O})_2)]$  with base present in acetonitrile, Figure S29. However, the presence of a strong base led to substitution kinetics rather than photo-dissociation, as the products formed are clearly not the same as under neutral conditions. Due to the absence of strong base *in vivo*, this reaction is not biologically relevant, however it is interesting and will be studied further for a separate paper.

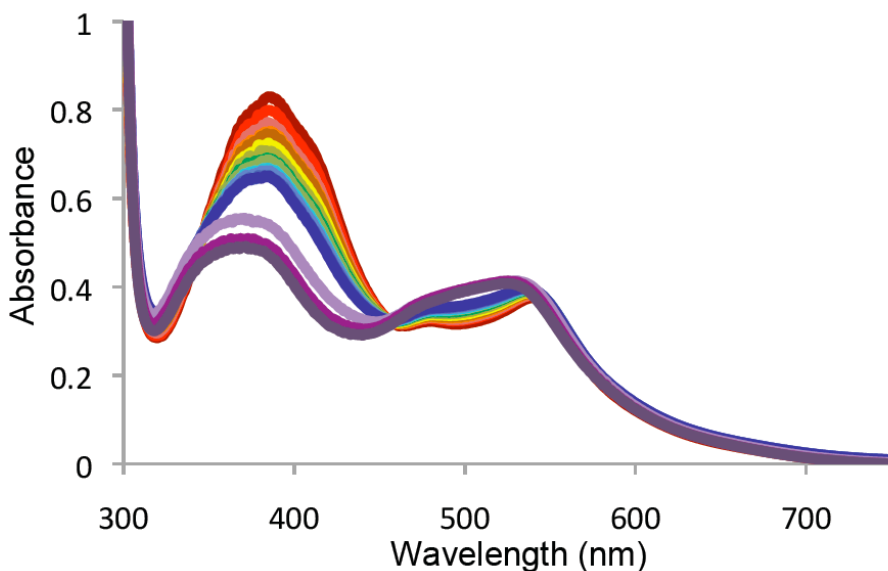

Figure S29 - UV/Visible spectra of deprotonated 50  $\mu\text{M}$   $[\text{Ru}(\text{bpy})_2(66'\text{bpy}(\text{O}^-)_2)]$  in acetonitrile with 10 fold excess of  $[\text{NBu}_4]\text{OH}$  irradiated with 450 nm blue light from (red = —) 0 minutes to (purple = —) 20 minutes at 25  $^\circ\text{C}$ .

**Aqueous studies at pH 5.** In a similar fashion to that done with protonated  $[\text{Ru}(\text{bpy})_2(66'\text{bpy}(\text{OH})_2)]^{2+}$  in acetonitrile, the reaction of  $[\text{Ru}(\text{bpy})_2(66'\text{bpy}(\text{OH})_2)]^{2+}$  in water at pH 5 was monitored by UV/Vis spectroscopy for 60 minutes. The peak at 461 nm undergoes the greatest change in absorbance with time (Figure S6). This is an  $\text{A} \rightarrow \text{B}$  process, where A is  $[\text{Ru}(\text{bpy})_2(66'\text{bpy}(\text{OH})_2)]^{2+}$  and B is  $[\text{Ru}(\text{bpy})_2(\text{H}_2\text{O})_2]^{2+}$ ; the free ligand,  $(66'\text{bpy}(\text{OH})_2)$ , does not absorb in this region. The rate constant of reaction was calculated by plotting  $[\text{A}]$  vs. time.  $[\text{A}]_t$  was calculated as shown in equations 1, 2, and 3. Some uncertainty in the rate constant is introduced because the  $\epsilon$  coefficients are not known exactly for  $[\text{Ru}(\text{bpy})_2(\text{H}_2\text{O})_2]^{2+}$  at 461 nm since this has not been synthesized independently. We estimated that  $\epsilon_{461}$  is 2940 - 3520  $\text{M}^{-1}\text{cm}^{-1}$  for this complex, based upon the extinction coefficients of the similar complex,  $[\text{Ru}(\text{bpy})_2(\text{CH}_3\text{CN})_2]^{2+}$ , at similar wavelengths. The zero order initial rate constant,  $k_{\text{obs}} = 1.7(2) \times 10^{-8}$  M/s, is an average value that takes into account this uncertainty in the estimated standard deviation.



a)

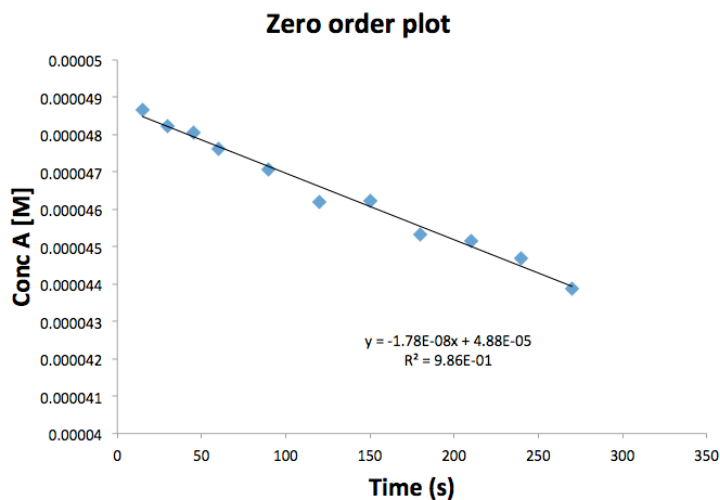

b)

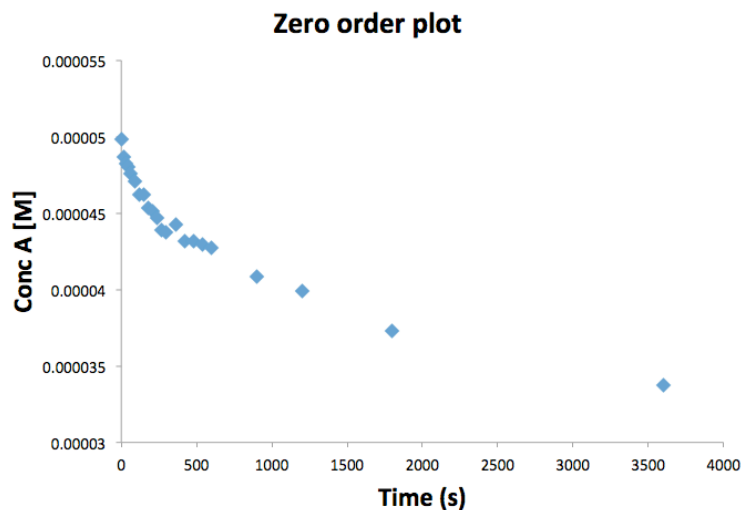

Figure S30 – a) A plot of  $[A]$  ( $A = [\text{Ru}(\text{bpy})_2(66'\text{bpy}(\text{OH})_2)]^{2+}$ ) vs. time for blue light induced photo-disassociation in water at pH 5. This plot used  $\epsilon_{461} = 3520 \text{ M}^{-1}\text{cm}^{-1}$  for the product,  $[\text{Ru}(\text{bpy})_2(\text{H}_2\text{O})_2]^{2+}$ . An initial rate of  $1.61 \times 10^{-8} \text{ M/s}$  results when  $\epsilon_{461} = 2940 \text{ M}^{-1}\text{cm}^{-1}$  is used. The value reported in the manuscript ( $1.7(2) \times 10^{-8} \text{ M/s}$ ) represents an average initial rate. b) The long term disappearance of the reactant. Presumably, the reaction slows down at longer times due to approaching equilibrium and an appreciable extent of back reaction as free ligand concentration increases (see discussion in main text).

**Aqueous studies at pH 7.5.** The peak at 377 nm undergoes slight changes in absorbance upon irradiation with blue light for one hour. But upon closer inspection, the plot of absorbance vs. time or concentration (of A or B in  $A \rightarrow B$  process) vs. time (Figure S31) shows no linear behavior ( $R^2 = 0.301$  for a zero order process). Other attempts to fit the data to first or second order rate laws were unsuccessful. The fluctuation in the absorbance values appears to be mostly noise, and at this pH the rate of photodecomposition is at, or slightly above, zero.

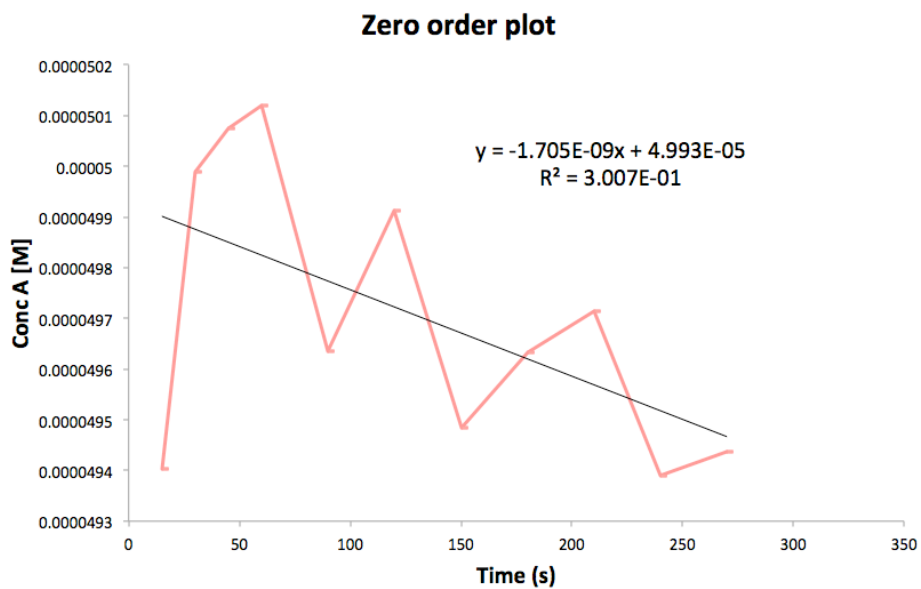

Figure S31 – An attempt to determine the initial rate of photodecomposition of  $[\text{Ru}(\text{bpy})_2(66'\text{bpy}(\text{OH})_2)]^{2+}$  (A) at pH 7.5 in aqueous solution by plotting  $[A]$  vs. time. The result appears to be noise in the spectra overlapping with a slight downward slope. This initial rate is assigned to be approximately zero, as it is not big enough to be clearly determined.

## Luminescence Spectroscopy

Quantum yields were determined by using the comparative method utilized by Williams et al.<sup>[4]</sup> All samples were degassed for 30 minutes. The standard used for the comparative method was  $[\text{Ru}(\text{bpy})_3]^{2+}$  with  $\phi = 0.063$  in water and  $\phi = 0.095$  in acetonitrile.<sup>[5]</sup>

Attempts to collect accurate emission data and quantum yields for  $[\text{Ru}(\text{bpy})_2(66'\text{bpy}(\text{OH})_2)]^{2+}$  proved to be unsuccessful as the excitation of the complex lead to photo-dissociation in water and acetonitrile. These results are not surprising because the complex is photounstable as determined in crystal growth and UV/visible absorbance spectroscopy studies. However,  $[\text{Ru}(\text{bpy})_2(44'\text{bpy}(\text{OH})_2)]^{2+}$  does not decompose when exposed to light. Quantum yield data in a 1:1 acetonitrile:water mixture are reported in Table S5. Most notably, the complex has emission properties that are quenched by over 10-fold upon deprotonation. These properties are comparable to those of  $[\text{Ru}(\text{bpy}(\text{OH})_2)_3]^{2+}$  which has a significant decrease in quantum yield upon deprotonation.<sup>[3]</sup> This quenched emission is due to an increase in the energy of the d levels of the complex upon deprotonation, that results in increasing nonradiative decay processes as expected by the energy gap law.<sup>[6]</sup> Studies carried out with  $[\text{Ru}(\text{bpy})_2(44'\text{bpy}(\text{OMe})_2)]^{2+}$  under both acidic and basic conditions reveal no change in the respective quantum yields, confirming the quenching results are from deprotonation of the ligand. Overall, the quantum yields decrease as the quantity of electron donating ligands increase from  $[\text{Ru}(\text{bpy})_3]^{2+} > [\text{Ru}(\text{bpy})_2(44'\text{bpy}(\text{OMe})_2)]^{2+} > [\text{Ru}(\text{bpy})_2(44'\text{bpy}(\text{OH})_2)]^{2+} > [\text{Ru}(\text{bpy}(\text{OMe})_2)_3]^{2+} > [\text{Ru}(\text{bpy}(\text{OH})_2)_3]^{2+} > [\text{Ru}(\text{bpy})_2(\text{bpy}(\text{O}^-)_2)] > [\text{Ru}(\text{bpy}(\text{O}^-)_2)_3]^{4-}$ .<sup>[3, 5]</sup>

Table S5. Luminescence data for  $[\text{Ru}(\text{bpy})_2(\text{X})]^{2+}$  (X = 44'bpy(OH)<sub>2</sub> or 44'bpy(OMe)<sub>2</sub>) in 1:1 acetonitrile:water mixture

| X                        | Acid/Base  | $\lambda_{\text{em}}$ (nm) | $\phi$ |
|--------------------------|------------|----------------------------|--------|
| 44'bpy(OH) <sub>2</sub>  | 0.1 M HCl  | 634                        | 0.041  |
| 44'bpy(OH) <sub>2</sub>  | 0.1 M NaOH | 610                        | 0.003  |
| 44'bpy(OMe) <sub>2</sub> | 0.1 M HCl  | 626                        | 0.060  |
| 44'bpy(OMe) <sub>2</sub> | 0.1 M NaOH | 626                        | 0.063  |

Excitation wavelength = 460 nm,  $\lambda_{\text{em}}$  = wavelength of maximum emission,  $\phi$  = quantum yield

## Crystallographic Data

[Ru(bpy)<sub>2</sub>(66'bpy(OH)<sub>2</sub>)] [PF<sub>6</sub>]<sub>2</sub> (paul017)

Table S6. Crystal data and structure refinement for paul017.

|                                   |                                             |                  |
|-----------------------------------|---------------------------------------------|------------------|
| Identification code               | paul017                                     |                  |
| Empirical formula                 | C79.50 H90.50 F24 N12.50 O8 P4 Ru2          |                  |
| Formula weight                    | 2131.16                                     |                  |
| Temperature                       | 110(2) K                                    |                  |
| Wavelength                        | 0.71073 Å                                   |                  |
| Crystal system                    | Triclinic                                   |                  |
| Space group                       | P-1                                         |                  |
| Unit cell dimensions              | a = 15.6613(14) Å                           | ∠ = 107.424(4)°. |
|                                   | b = 16.8213(16) Å                           | ∠ = 100.597(4)°. |
|                                   | c = 19.0713(17) Å                           | ∠ = 105.364(4)°. |
| Volume                            | 4429.1(7) Å <sup>3</sup>                    |                  |
| Z                                 | 2                                           |                  |
| Density (calculated)              | 1.598 Mg/m <sup>3</sup>                     |                  |
| Absorption coefficient            | 0.525 mm <sup>-1</sup>                      |                  |
| F(000)                            | 2166                                        |                  |
| Crystal size                      | 0.13 x 0.12 x 0.08 mm <sup>3</sup>          |                  |
| Theta range for data collection   | 1.41 to 33.19°.                             |                  |
| Index ranges                      | -23 ≤ h ≤ 24, -25 ≤ k ≤ 25, -29 ≤ l ≤ 29    |                  |
| Reflections collected             | 94387                                       |                  |
| Independent reflections           | 33738 [R(int) = 0.0534]                     |                  |
| Completeness to theta = 33.19°    | 99.5 %                                      |                  |
| Absorption correction             | Semi-empirical from equivalents             |                  |
| Max. and min. transmission        | 0.9592 and 0.9349                           |                  |
| Refinement method                 | Full-matrix least-squares on F <sup>2</sup> |                  |
| Data / restraints / parameters    | 33738 / 282 / 1303                          |                  |
| Goodness-of-fit on F <sup>2</sup> | 1.019                                       |                  |
| Final R indices [I > 2σ(I)]       | R1 = 0.0551, wR2 = 0.1231                   |                  |
| R indices (all data)              | R1 = 0.1111, wR2 = 0.1482                   |                  |
| Largest diff. peak and hole       | 1.694 and -1.147 e.Å <sup>-3</sup>          |                  |

Table S7. Atomic coordinates ( $\times 10^4$ ) and equivalent isotropic displacement parameters ( $\text{\AA}^2 \times 10^3$ ) for paul017.  $U(\text{eq})$  is defined as one third of the trace of the orthogonalized  $U^{ij}$  tensor.

|       | x        | y        | z       | U(eq) |
|-------|----------|----------|---------|-------|
| Ru(1) | -2405(1) | 7554(1)  | 8566(1) | 17(1) |
| Ru(2) | 7638(1)  | 7399(1)  | 3620(1) | 15(1) |
| N(1)  | -2749(2) | 8705(2)  | 8758(1) | 19(1) |
| N(2)  | -1276(1) | 8500(2)  | 9473(1) | 19(1) |
| N(3)  | -1716(1) | 7727(2)  | 7780(1) | 18(1) |
| N(4)  | -1940(1) | 6505(2)  | 8369(1) | 20(1) |
| N(5)  | -3154(2) | 7283(2)  | 9303(1) | 19(1) |
| N(6)  | -3655(1) | 6694(1)  | 7809(1) | 18(1) |
| N(7)  | 8812(1)  | 8315(1)  | 4503(1) | 17(1) |
| N(8)  | 7308(1)  | 8567(1)  | 3887(1) | 17(1) |
| N(9)  | 6894(1)  | 7143(1)  | 4366(1) | 17(1) |
| N(10) | 6380(1)  | 6561(1)  | 2868(1) | 16(1) |
| N(11) | 8283(1)  | 7556(2)  | 2803(1) | 18(1) |
| N(12) | 8048(1)  | 6317(2)  | 3369(1) | 18(1) |
| O(1)  | -3819(1) | 8201(1)  | 7612(1) | 28(1) |
| O(2)  | -296(1)  | 7732(1)  | 9324(1) | 29(1) |
| O(3)  | 9700(1)  | 7456(1)  | 4305(1) | 31(1) |
| O(4)  | 6075(1)  | 8069(1)  | 2847(1) | 25(1) |
| P(1)  | 2896(1)  | 5206(1)  | 4493(1) | 27(1) |
| F(1)  | 3901(1)  | 5188(1)  | 4818(1) | 35(1) |
| F(2)  | 3098(1)  | 5117(2)  | 3680(1) | 46(1) |
| F(3)  | 3313(1)  | 6256(1)  | 4759(1) | 42(1) |
| F(4)  | 2712(1)  | 5314(2)  | 5302(1) | 48(1) |
| F(5)  | 2492(2)  | 4154(1)  | 4223(1) | 59(1) |
| F(6)  | 1890(1)  | 5217(2)  | 4164(1) | 55(1) |
| P(2)  | 2160(1)  | 9568(1)  | 7665(1) | 28(1) |
| F(7)  | 1156(1)  | 9641(1)  | 7624(1) | 37(1) |
| F(8)  | 2171(2)  | 9900(2)  | 6957(1) | 64(1) |
| F(9)  | 1708(2)  | 8579(1)  | 7074(1) | 57(1) |
| F(10) | 2146(2)  | 9254(2)  | 8362(1) | 71(1) |
| F(11) | 2600(2)  | 10572(2) | 8242(2) | 74(1) |

|       |          |          |          |        |
|-------|----------|----------|----------|--------|
| F(12) | 3161(1)  | 9506(2)  | 7697(1)  | 53(1)  |
| P(3)  | 2905(1)  | 5275(1)  | 9696(1)  | 31(1)  |
| F(13) | 3941(1)  | 5267(2)  | 9945(1)  | 57(1)  |
| F(14) | 2920(2)  | 4951(2)  | 8838(1)  | 67(1)  |
| F(15) | 3323(1)  | 6275(1)  | 9778(1)  | 46(1)  |
| F(16) | 2913(2)  | 5613(2)  | 10570(1) | 87(1)  |
| F(17) | 2499(2)  | 4282(2)  | 9643(2)  | 84(1)  |
| F(18) | 1884(1)  | 5274(2)  | 9428(1)  | 56(1)  |
| P(4)  | 1822(1)  | 9038(1)  | 2740(1)  | 48(1)  |
| F(19) | 2558(2)  | 8919(2)  | 3375(1)  | 70(1)  |
| F(20) | 2142(2)  | 10061(2) | 3269(1)  | 57(1)  |
| F(21) | 1081(2)  | 8790(2)  | 3184(1)  | 59(1)  |
| F(22) | 1499(2)  | 8005(2)  | 2228(1)  | 82(1)  |
| F(23) | 2592(2)  | 9221(2)  | 2333(2)  | 96(1)  |
| F(24) | 1086(2)  | 9138(2)  | 2136(2)  | 104(1) |
| C(1)  | -3400(2) | 8855(2)  | 8298(2)  | 23(1)  |
| C(2)  | -3607(2) | 9629(2)  | 8512(2)  | 32(1)  |
| C(3)  | -3117(2) | 10281(2) | 9218(2)  | 39(1)  |
| C(4)  | -2421(2) | 10159(2) | 9692(2)  | 34(1)  |
| C(5)  | -2252(2) | 9372(2)  | 9449(2)  | 22(1)  |
| C(6)  | -1460(2) | 9225(2)  | 9873(2)  | 20(1)  |
| C(7)  | -914(2)  | 9798(2)  | 10601(2) | 25(1)  |
| C(8)  | -138(2)  | 9637(2)  | 10923(2) | 26(1)  |
| C(9)  | 98(2)    | 8955(2)  | 10509(2) | 24(1)  |
| C(10) | -481(2)  | 8400(2)  | 9773(2)  | 21(1)  |
| C(11) | -1601(2) | 8400(2)  | 7523(1)  | 21(1)  |
| C(12) | -1062(2) | 8514(2)  | 7038(2)  | 25(1)  |
| C(13) | -625(2)  | 7911(2)  | 6799(2)  | 30(1)  |
| C(14) | -754(2)  | 7204(2)  | 7042(2)  | 27(1)  |
| C(15) | -1300(2) | 7124(2)  | 7533(2)  | 21(1)  |
| C(16) | -1449(2) | 6419(2)  | 7848(2)  | 22(1)  |
| C(17) | -1098(2) | 5738(2)  | 7668(2)  | 30(1)  |
| C(18) | -1220(2) | 5144(2)  | 8039(2)  | 38(1)  |
| C(19) | -1705(2) | 5240(2)  | 8577(2)  | 35(1)  |
| C(20) | -2059(2) | 5916(2)  | 8724(2)  | 26(1)  |
| C(21) | -2841(2) | 7535(2)  | 10071(2) | 23(1)  |

|       |          |          |          |       |
|-------|----------|----------|----------|-------|
| C(22) | -3409(2) | 7375(2)  | 10526(2) | 28(1) |
| C(23) | -4341(2) | 6918(2)  | 10181(2) | 28(1) |
| C(24) | -4678(2) | 6640(2)  | 9392(2)  | 25(1) |
| C(25) | -4076(2) | 6829(2)  | 8967(2)  | 19(1) |
| C(26) | -4359(2) | 6525(2)  | 8125(2)  | 20(1) |
| C(27) | -5265(2) | 6080(2)  | 7668(2)  | 26(1) |
| C(28) | -5445(2) | 5761(2)  | 6876(2)  | 26(1) |
| C(29) | -4718(2) | 5872(2)  | 6562(2)  | 24(1) |
| C(30) | -3835(2) | 6349(2)  | 7043(1)  | 21(1) |
| C(31) | 9615(2)  | 8192(2)  | 4748(2)  | 21(1) |
| C(32) | 10290(2) | 8783(2)  | 5424(2)  | 24(1) |
| C(33) | 10148(2) | 9522(2)  | 5851(2)  | 25(1) |
| C(34) | 9347(2)  | 9684(2)  | 5588(2)  | 22(1) |
| C(35) | 8703(2)  | 9078(2)  | 4911(1)  | 18(1) |
| C(36) | 7856(2)  | 9219(2)  | 4574(1)  | 18(1) |
| C(37) | 7651(2)  | 9962(2)  | 4915(2)  | 26(1) |
| C(38) | 6860(2)  | 10063(2) | 4540(2)  | 29(1) |
| C(39) | 6320(2)  | 9435(2)  | 3844(2)  | 26(1) |
| C(40) | 6565(2)  | 8699(2)  | 3530(2)  | 20(1) |
| C(41) | 7195(2)  | 7450(2)  | 5136(2)  | 22(1) |
| C(42) | 6616(2)  | 7384(2)  | 5592(2)  | 26(1) |
| C(43) | 5676(2)  | 6959(2)  | 5253(2)  | 26(1) |
| C(44) | 5351(2)  | 6609(2)  | 4461(2)  | 24(1) |
| C(45) | 5962(2)  | 6704(2)  | 4027(1)  | 18(1) |
| C(46) | 5686(2)  | 6367(2)  | 3188(2)  | 18(1) |
| C(47) | 4783(2)  | 5884(2)  | 2735(2)  | 23(1) |
| C(48) | 4588(2)  | 5583(2)  | 1942(2)  | 25(1) |
| C(49) | 5309(2)  | 5746(2)  | 1620(2)  | 23(1) |
| C(50) | 6190(2)  | 6239(2)  | 2099(2)  | 21(1) |
| C(51) | 8382(2)  | 8236(2)  | 2553(2)  | 21(1) |
| C(52) | 8828(2)  | 8300(2)  | 2000(2)  | 26(1) |
| C(53) | 9174(2)  | 7648(2)  | 1686(2)  | 29(1) |
| C(54) | 9064(2)  | 6944(2)  | 1931(2)  | 26(1) |
| C(55) | 8622(2)  | 6908(2)  | 2495(2)  | 20(1) |
| C(56) | 8476(2)  | 6204(2)  | 2805(2)  | 20(1) |
| C(57) | 8767(2)  | 5482(2)  | 2567(2)  | 29(1) |

|        |          |          |           |       |
|--------|----------|----------|-----------|-------|
| C(58)  | 8638(2)  | 4876(2)  | 2922(2)   | 36(1) |
| C(59)  | 8215(2)  | 4993(2)  | 3502(2)   | 35(1) |
| C(60)  | 7930(2)  | 5714(2)  | 3706(2)   | 25(1) |
| O(5)   | 4386(1)  | 8118(1)  | 2432(1)   | 30(1) |
| C(61)  | 4811(3)  | 8577(3)  | 1437(2)   | 50(1) |
| C(62)  | 4065(2)  | 8002(3)  | 1637(2)   | 45(1) |
| C(63)  | 3708(2)  | 7573(2)  | 2661(2)   | 37(1) |
| C(64)  | 4048(3)  | 7810(3)  | 3509(2)   | 50(1) |
| O(6)   | 1120(5)  | 7060(5)  | 4769(4)   | 52(2) |
| C(65)  | 1372(15) | 6956(9)  | 3529(8)   | 85(4) |
| C(66)  | 1838(10) | 7348(11) | 4378(7)   | 53(2) |
| C(67)  | 1070(5)  | 6496(5)  | 5046(4)   | 58(2) |
| C(68)  | 490(8)   | 6438(9)  | 5553(6)   | 74(3) |
| O(6')  | 1303(9)  | 7331(7)  | 4862(7)   | 44(2) |
| C(65') | 1380(20) | 6721(12) | 3525(11)  | 51(3) |
| C(66') | 1824(17) | 7427(18) | 4291(10)  | 49(3) |
| C(67') | 1567(8)  | 7097(8)  | 5408(6)   | 56(2) |
| C(68') | 835(12)  | 6638(12) | 5667(10)  | 54(3) |
| O(7)   | 5052(2)  | 8510(2)  | 6622(1)   | 37(1) |
| C(69)  | 5283(3)  | 9119(3)  | 5621(2)   | 59(1) |
| C(70)  | 5545(3)  | 9264(3)  | 6458(2)   | 48(1) |
| C(71)  | 4126(3)  | 8412(3)  | 6575(3)   | 56(1) |
| C(72)  | 3708(3)  | 7662(3)  | 6823(2)   | 53(1) |
| O(8)   | 1268(11) | 7521(12) | 9790(8)   | 39(1) |
| C(73)  | 1494(5)  | 7440(4)  | 8569(4)   | 53(2) |
| C(74)  | 1502(9)  | 7020(9)  | 9153(6)   | 53(2) |
| C(75)  | 1370(8)  | 7208(11) | 10412(7)  | 51(2) |
| C(76)  | 559(10)  | 6393(10) | 10273(8)  | 59(3) |
| O(8')  | 1310(20) | 7530(20) | 9710(15)  | 47(2) |
| C(73') | 2398(7)  | 7482(7)  | 8989(6)   | 52(3) |
| C(74') | 1435(13) | 7077(16) | 8997(10)  | 51(3) |
| C(75') | 1559(14) | 7293(18) | 10347(12) | 45(3) |
| C(76') | 791(16)  | 6570(16) | 10412(13) | 45(3) |
| C(77)  | 4783(4)  | 8548(3)  | 9223(3)   | 43(4) |
| C(78)  | 4230(3)  | 9014(3)  | 9019(3)   | 40(2) |
| C(79)  | 4403(4)  | 9884(3)  | 9487(3)   | 39(2) |



|       |          |           |          |       |
|-------|----------|-----------|----------|-------|
| C(80) | 5128(4)  | 10289(3)  | 10160(3) | 40(2) |
| C(81) | 5681(3)  | 9823(3)   | 10365(3) | 36(2) |
| C(82) | 5509(3)  | 8953(3)   | 9896(3)  | 40(2) |
| C(83) | 5296(10) | 11196(10) | 10660(8) | 52(3) |
| N(13) | 5449(9)  | 11902(6)  | 11040(6) | 89(4) |

---

Table S8. Bond lengths [ $\text{\AA}$ ] and angles [ $^\circ$ ] for paul017.

---

|             |          |
|-------------|----------|
| Ru(1)-N(4)  | 2.043(2) |
| Ru(1)-N(3)  | 2.046(2) |
| Ru(1)-N(6)  | 2.053(2) |
| Ru(1)-N(5)  | 2.066(2) |
| Ru(1)-N(1)  | 2.091(2) |
| Ru(1)-N(2)  | 2.094(2) |
| Ru(2)-N(12) | 2.040(2) |
| Ru(2)-N(10) | 2.050(2) |
| Ru(2)-N(11) | 2.050(2) |
| Ru(2)-N(9)  | 2.068(2) |
| Ru(2)-N(7)  | 2.098(2) |
| Ru(2)-N(8)  | 2.103(2) |
| N(1)-C(1)   | 1.345(3) |
| N(1)-C(5)   | 1.370(3) |
| N(2)-C(10)  | 1.347(3) |
| N(2)-C(6)   | 1.365(3) |
| N(3)-C(11)  | 1.345(3) |
| N(3)-C(15)  | 1.360(3) |
| N(4)-C(20)  | 1.352(4) |
| N(4)-C(16)  | 1.361(3) |
| N(5)-C(21)  | 1.349(3) |
| N(5)-C(25)  | 1.364(3) |
| N(6)-C(30)  | 1.343(3) |
| N(6)-C(26)  | 1.357(3) |
| N(7)-C(31)  | 1.350(3) |
| N(7)-C(35)  | 1.360(3) |
| N(8)-C(40)  | 1.343(3) |
| N(8)-C(36)  | 1.372(3) |
| N(9)-C(41)  | 1.345(3) |
| N(9)-C(45)  | 1.375(3) |
| N(10)-C(50) | 1.347(3) |
| N(10)-C(46) | 1.354(3) |
| N(11)-C(51) | 1.348(3) |
| N(11)-C(55) | 1.360(3) |

|             |            |
|-------------|------------|
| N(12)-C(60) | 1.345(3)   |
| N(12)-C(56) | 1.362(3)   |
| O(1)-C(1)   | 1.340(3)   |
| O(1)-H(1)   | 0.6737     |
| O(2)-C(10)  | 1.329(3)   |
| O(2)-H(2)   | 0.7660     |
| O(3)-C(31)  | 1.327(3)   |
| O(3)-H(3)   | 0.7631     |
| O(4)-C(40)  | 1.335(3)   |
| O(4)-H(4)   | 0.6624     |
| P(1)-F(4)   | 1.588(2)   |
| P(1)-F(6)   | 1.591(2)   |
| P(1)-F(3)   | 1.592(2)   |
| P(1)-F(5)   | 1.592(2)   |
| P(1)-F(1)   | 1.5942(18) |
| P(1)-F(2)   | 1.611(2)   |
| P(2)-F(10)  | 1.572(2)   |
| P(2)-F(9)   | 1.580(2)   |
| P(2)-F(11)  | 1.590(2)   |
| P(2)-F(12)  | 1.590(2)   |
| P(2)-F(7)   | 1.5980(19) |
| P(2)-F(8)   | 1.609(2)   |
| P(3)-F(14)  | 1.570(2)   |
| P(3)-F(15)  | 1.583(2)   |
| P(3)-F(18)  | 1.585(2)   |
| P(3)-F(17)  | 1.586(2)   |
| P(3)-F(16)  | 1.587(2)   |
| P(3)-F(13)  | 1.609(2)   |
| P(4)-F(24)  | 1.554(3)   |
| P(4)-F(23)  | 1.562(3)   |
| P(4)-F(20)  | 1.597(2)   |
| P(4)-F(21)  | 1.599(3)   |
| P(4)-F(22)  | 1.602(3)   |
| P(4)-F(19)  | 1.609(2)   |
| C(1)-C(2)   | 1.387(4)   |
| C(2)-C(3)   | 1.375(4)   |

|              |          |
|--------------|----------|
| C(2)-H(2A)   | 0.9500   |
| C(3)-C(4)    | 1.384(4) |
| C(3)-H(3A)   | 0.9500   |
| C(4)-C(5)    | 1.378(4) |
| C(4)-H(4A)   | 0.9500   |
| C(5)-C(6)    | 1.472(4) |
| C(6)-C(7)    | 1.382(4) |
| C(7)-C(8)    | 1.388(4) |
| C(7)-H(7A)   | 0.9500   |
| C(8)-C(9)    | 1.366(4) |
| C(8)-H(8A)   | 0.9500   |
| C(9)-C(10)   | 1.401(4) |
| C(9)-H(9A)   | 0.9500   |
| C(11)-C(12)  | 1.383(4) |
| C(11)-H(11A) | 0.9500   |
| C(12)-C(13)  | 1.382(4) |
| C(12)-H(12A) | 0.9500   |
| C(13)-C(14)  | 1.381(4) |
| C(13)-H(13A) | 0.9500   |
| C(14)-C(15)  | 1.391(4) |
| C(14)-H(14A) | 0.9500   |
| C(15)-C(16)  | 1.467(4) |
| C(16)-C(17)  | 1.378(4) |
| C(17)-C(18)  | 1.381(5) |
| C(17)-H(17A) | 0.9500   |
| C(18)-C(19)  | 1.380(5) |
| C(18)-H(18A) | 0.9500   |
| C(19)-C(20)  | 1.371(4) |
| C(19)-H(19A) | 0.9500   |
| C(20)-H(20A) | 0.9500   |
| C(21)-C(22)  | 1.382(4) |
| C(21)-H(21A) | 0.9500   |
| C(22)-C(23)  | 1.379(4) |
| C(22)-H(22A) | 0.9500   |
| C(23)-C(24)  | 1.383(4) |
| C(23)-H(23A) | 0.9500   |

|              |          |
|--------------|----------|
| C(24)-C(25)  | 1.388(4) |
| C(24)-H(24A) | 0.9500   |
| C(25)-C(26)  | 1.471(4) |
| C(26)-C(27)  | 1.387(4) |
| C(27)-C(28)  | 1.389(4) |
| C(27)-H(27A) | 0.9500   |
| C(28)-C(29)  | 1.377(4) |
| C(28)-H(28A) | 0.9500   |
| C(29)-C(30)  | 1.379(4) |
| C(29)-H(29A) | 0.9500   |
| C(30)-H(30A) | 0.9500   |
| C(31)-C(32)  | 1.394(4) |
| C(32)-C(33)  | 1.366(4) |
| C(32)-H(32A) | 0.9500   |
| C(33)-C(34)  | 1.389(4) |
| C(33)-H(33A) | 0.9500   |
| C(34)-C(35)  | 1.383(3) |
| C(34)-H(34A) | 0.9500   |
| C(35)-C(36)  | 1.474(3) |
| C(36)-C(37)  | 1.375(4) |
| C(37)-C(38)  | 1.390(4) |
| C(37)-H(37A) | 0.9500   |
| C(38)-C(39)  | 1.366(4) |
| C(38)-H(38A) | 0.9500   |
| C(39)-C(40)  | 1.391(4) |
| C(39)-H(39A) | 0.9500   |
| C(41)-C(42)  | 1.374(4) |
| C(41)-H(41A) | 0.9500   |
| C(42)-C(43)  | 1.382(4) |
| C(42)-H(42A) | 0.9500   |
| C(43)-C(44)  | 1.385(4) |
| C(43)-H(43A) | 0.9500   |
| C(44)-C(45)  | 1.383(4) |
| C(44)-H(44A) | 0.9500   |
| C(45)-C(46)  | 1.463(3) |
| C(46)-C(47)  | 1.389(3) |

|              |          |
|--------------|----------|
| C(47)-C(48)  | 1.389(4) |
| C(47)-H(47A) | 0.9500   |
| C(48)-C(49)  | 1.384(4) |
| C(48)-H(48A) | 0.9500   |
| C(49)-C(50)  | 1.379(4) |
| C(49)-H(49A) | 0.9500   |
| C(50)-H(50A) | 0.9500   |
| C(51)-C(52)  | 1.383(4) |
| C(51)-H(51A) | 0.9500   |
| C(52)-C(53)  | 1.376(4) |
| C(52)-H(52A) | 0.9500   |
| C(53)-C(54)  | 1.380(4) |
| C(53)-H(53A) | 0.9500   |
| C(54)-C(55)  | 1.391(4) |
| C(54)-H(54A) | 0.9500   |
| C(55)-C(56)  | 1.460(4) |
| C(56)-C(57)  | 1.388(4) |
| C(57)-C(58)  | 1.375(4) |
| C(57)-H(57A) | 0.9500   |
| C(58)-C(59)  | 1.382(4) |
| C(58)-H(58A) | 0.9500   |
| C(59)-C(60)  | 1.374(4) |
| C(59)-H(59A) | 0.9500   |
| C(60)-H(60A) | 0.9500   |
| O(5)-C(63)   | 1.432(4) |
| O(5)-C(62)   | 1.443(4) |
| C(61)-C(62)  | 1.495(5) |
| C(61)-H(61A) | 0.9800   |
| C(61)-H(61B) | 0.9800   |
| C(61)-H(61C) | 0.9800   |
| C(62)-H(62A) | 0.9900   |
| C(62)-H(62B) | 0.9900   |
| C(63)-C(64)  | 1.498(5) |
| C(63)-H(63A) | 0.9900   |
| C(63)-H(63B) | 0.9900   |
| C(64)-H(64A) | 0.9800   |

|               |           |
|---------------|-----------|
| C(64)-H(64B)  | 0.9800    |
| C(64)-H(64C)  | 0.9800    |
| O(6)-C(67)    | 1.208(8)  |
| O(6)-C(66)    | 1.514(9)  |
| C(65)-C(66)   | 1.503(11) |
| C(65)-H(65A)  | 0.9800    |
| C(65)-H(65B)  | 0.9800    |
| C(65)-H(65C)  | 0.9800    |
| C(66)-H(66A)  | 0.9900    |
| C(66)-H(66B)  | 0.9900    |
| C(67)-C(68)   | 1.450(10) |
| C(67)-H(67A)  | 0.9900    |
| C(67)-H(67B)  | 0.9900    |
| C(68)-H(68A)  | 0.9800    |
| C(68)-H(68B)  | 0.9800    |
| C(68)-H(68C)  | 0.9800    |
| O(6')-C(67')  | 1.259(12) |
| O(6')-C(66')  | 1.495(12) |
| C(65')-C(66') | 1.476(15) |
| C(65')-H(65D) | 0.9800    |
| C(65')-H(65E) | 0.9800    |
| C(65')-H(65F) | 0.9800    |
| C(66')-H(66C) | 0.9900    |
| C(66')-H(66D) | 0.9900    |
| C(67')-C(68') | 1.457(13) |
| C(67')-H(67C) | 0.9900    |
| C(67')-H(67D) | 0.9900    |
| C(68')-H(68D) | 0.9800    |
| C(68')-H(68E) | 0.9800    |
| C(68')-H(68F) | 0.9800    |
| O(7)-C(71)    | 1.398(4)  |
| O(7)-C(70)    | 1.452(4)  |
| C(69)-C(70)   | 1.499(5)  |
| C(69)-H(69A)  | 0.9800    |
| C(69)-H(69B)  | 0.9800    |
| C(69)-H(69C)  | 0.9800    |

|               |           |
|---------------|-----------|
| C(70)-H(70A)  | 0.9900    |
| C(70)-H(70B)  | 0.9900    |
| C(71)-C(72)   | 1.508(6)  |
| C(71)-H(71A)  | 0.9900    |
| C(71)-H(71B)  | 0.9900    |
| C(72)-H(72A)  | 0.9800    |
| C(72)-H(72B)  | 0.9800    |
| C(72)-H(72C)  | 0.9800    |
| O(8)-C(74)    | 1.427(8)  |
| O(8)-C(75)    | 1.435(8)  |
| C(73)-C(74)   | 1.485(11) |
| C(73)-H(73A)  | 0.9800    |
| C(73)-H(73B)  | 0.9800    |
| C(73)-H(73C)  | 0.9800    |
| C(74)-H(74A)  | 0.9900    |
| C(74)-H(74B)  | 0.9900    |
| C(75)-C(76)   | 1.516(10) |
| C(75)-H(75A)  | 0.9900    |
| C(75)-H(75B)  | 0.9900    |
| C(76)-H(76A)  | 0.9800    |
| C(76)-H(76B)  | 0.9800    |
| C(76)-H(76C)  | 0.9800    |
| O(8')-C(75')  | 1.415(13) |
| O(8')-C(74')  | 1.427(13) |
| C(73')-C(74') | 1.487(17) |
| C(73')-H(73D) | 0.9800    |
| C(73')-H(73E) | 0.9800    |
| C(73')-H(73F) | 0.9800    |
| C(74')-H(74C) | 0.9900    |
| C(74')-H(74D) | 0.9900    |
| C(75')-C(76') | 1.522(14) |
| C(75')-H(75C) | 0.9900    |
| C(75')-H(75D) | 0.9900    |
| C(76')-H(76D) | 0.9800    |
| C(76')-H(76E) | 0.9800    |
| C(76')-H(76F) | 0.9800    |



|             |           |
|-------------|-----------|
| C(77)-C(78) | 1.3900    |
| C(77)-C(82) | 1.3900    |
| C(77)-H(77) | 0.9500    |
| C(78)-C(79) | 1.3900    |
| C(78)-H(78) | 0.9500    |
| C(79)-C(80) | 1.3900    |
| C(79)-H(79) | 0.9500    |
| C(80)-C(81) | 1.3900    |
| C(80)-C(83) | 1.460(15) |
| C(81)-C(82) | 1.3900    |
| C(81)-H(81) | 0.9500    |
| C(82)-H(82) | 0.9500    |
| C(83)-N(13) | 1.124(16) |

|                   |           |
|-------------------|-----------|
| N(4)-Ru(1)-N(3)   | 78.91(9)  |
| N(4)-Ru(1)-N(6)   | 87.71(8)  |
| N(3)-Ru(1)-N(6)   | 97.99(8)  |
| N(4)-Ru(1)-N(5)   | 98.40(9)  |
| N(3)-Ru(1)-N(5)   | 175.71(8) |
| N(6)-Ru(1)-N(5)   | 78.48(9)  |
| N(4)-Ru(1)-N(1)   | 173.93(9) |
| N(3)-Ru(1)-N(1)   | 96.25(9)  |
| N(6)-Ru(1)-N(1)   | 96.64(8)  |
| N(5)-Ru(1)-N(1)   | 86.64(9)  |
| N(4)-Ru(1)-N(2)   | 98.95(9)  |
| N(3)-Ru(1)-N(2)   | 91.39(8)  |
| N(6)-Ru(1)-N(2)   | 169.41(8) |
| N(5)-Ru(1)-N(2)   | 92.34(8)  |
| N(1)-Ru(1)-N(2)   | 77.37(9)  |
| N(12)-Ru(2)-N(10) | 86.02(8)  |
| N(12)-Ru(2)-N(11) | 78.77(9)  |
| N(10)-Ru(2)-N(11) | 96.25(8)  |
| N(12)-Ru(2)-N(9)  | 99.39(9)  |
| N(10)-Ru(2)-N(9)  | 78.75(8)  |
| N(11)-Ru(2)-N(9)  | 174.82(8) |
| N(12)-Ru(2)-N(7)  | 99.44(8)  |

|                   |            |
|-------------------|------------|
| N(10)-Ru(2)-N(7)  | 171.42(8)  |
| N(11)-Ru(2)-N(7)  | 91.33(8)   |
| N(9)-Ru(2)-N(7)   | 93.76(8)   |
| N(12)-Ru(2)-N(8)  | 176.10(8)  |
| N(10)-Ru(2)-N(8)  | 97.27(8)   |
| N(11)-Ru(2)-N(8)  | 98.73(9)   |
| N(9)-Ru(2)-N(8)   | 83.36(8)   |
| N(7)-Ru(2)-N(8)   | 77.54(8)   |
| C(1)-N(1)-C(5)    | 117.4(2)   |
| C(1)-N(1)-Ru(1)   | 128.10(18) |
| C(5)-N(1)-Ru(1)   | 114.50(17) |
| C(10)-N(2)-C(6)   | 117.8(2)   |
| C(10)-N(2)-Ru(1)  | 127.32(18) |
| C(6)-N(2)-Ru(1)   | 113.72(17) |
| C(11)-N(3)-C(15)  | 118.1(2)   |
| C(11)-N(3)-Ru(1)  | 125.94(18) |
| C(15)-N(3)-Ru(1)  | 115.86(18) |
| C(20)-N(4)-C(16)  | 118.4(2)   |
| C(20)-N(4)-Ru(1)  | 125.57(19) |
| C(16)-N(4)-Ru(1)  | 116.04(18) |
| C(21)-N(5)-C(25)  | 117.3(2)   |
| C(21)-N(5)-Ru(1)  | 127.45(18) |
| C(25)-N(5)-Ru(1)  | 115.15(17) |
| C(30)-N(6)-C(26)  | 118.8(2)   |
| C(30)-N(6)-Ru(1)  | 125.62(18) |
| C(26)-N(6)-Ru(1)  | 115.37(17) |
| C(31)-N(7)-C(35)  | 117.6(2)   |
| C(31)-N(7)-Ru(2)  | 127.15(18) |
| C(35)-N(7)-Ru(2)  | 114.90(16) |
| C(40)-N(8)-C(36)  | 117.0(2)   |
| C(40)-N(8)-Ru(2)  | 127.94(18) |
| C(36)-N(8)-Ru(2)  | 114.36(16) |
| C(41)-N(9)-C(45)  | 117.5(2)   |
| C(41)-N(9)-Ru(2)  | 127.45(18) |
| C(45)-N(9)-Ru(2)  | 114.50(16) |
| C(50)-N(10)-C(46) | 118.9(2)   |

|                   |            |
|-------------------|------------|
| C(50)-N(10)-Ru(2) | 125.32(18) |
| C(46)-N(10)-Ru(2) | 115.67(16) |
| C(51)-N(11)-C(55) | 119.1(2)   |
| C(51)-N(11)-Ru(2) | 125.08(18) |
| C(55)-N(11)-Ru(2) | 115.81(18) |
| C(60)-N(12)-C(56) | 117.8(2)   |
| C(60)-N(12)-Ru(2) | 126.14(18) |
| C(56)-N(12)-Ru(2) | 116.06(18) |
| C(1)-O(1)-H(1)    | 109.5      |
| C(10)-O(2)-H(2)   | 109.5      |
| C(31)-O(3)-H(3)   | 109.5      |
| C(40)-O(4)-H(4)   | 109.5      |
| F(4)-P(1)-F(6)    | 89.90(12)  |
| F(4)-P(1)-F(3)    | 89.61(12)  |
| F(6)-P(1)-F(3)    | 90.65(12)  |
| F(4)-P(1)-F(5)    | 90.96(13)  |
| F(6)-P(1)-F(5)    | 90.05(13)  |
| F(3)-P(1)-F(5)    | 179.10(13) |
| F(4)-P(1)-F(1)    | 90.30(11)  |
| F(6)-P(1)-F(1)    | 179.61(15) |
| F(3)-P(1)-F(1)    | 89.68(11)  |
| F(5)-P(1)-F(1)    | 89.62(11)  |
| F(4)-P(1)-F(2)    | 178.78(14) |
| F(6)-P(1)-F(2)    | 90.54(11)  |
| F(3)-P(1)-F(2)    | 89.25(12)  |
| F(5)-P(1)-F(2)    | 90.18(13)  |
| F(1)-P(1)-F(2)    | 89.26(10)  |
| F(10)-P(2)-F(9)   | 91.42(15)  |
| F(10)-P(2)-F(11)  | 89.93(16)  |
| F(9)-P(2)-F(11)   | 178.42(15) |
| F(10)-P(2)-F(12)  | 90.24(13)  |
| F(9)-P(2)-F(12)   | 90.15(12)  |
| F(11)-P(2)-F(12)  | 90.66(12)  |
| F(10)-P(2)-F(7)   | 90.70(12)  |
| F(9)-P(2)-F(7)    | 90.18(11)  |
| F(11)-P(2)-F(7)   | 88.99(11)  |

|                  |            |
|------------------|------------|
| F(12)-P(2)-F(7)  | 178.99(14) |
| F(10)-P(2)-F(8)  | 179.22(14) |
| F(9)-P(2)-F(8)   | 89.21(14)  |
| F(11)-P(2)-F(8)  | 89.43(16)  |
| F(12)-P(2)-F(8)  | 90.21(12)  |
| F(7)-P(2)-F(8)   | 88.84(11)  |
| F(14)-P(3)-F(15) | 90.62(14)  |
| F(14)-P(3)-F(18) | 89.77(13)  |
| F(15)-P(3)-F(18) | 91.16(12)  |
| F(14)-P(3)-F(17) | 91.08(17)  |
| F(15)-P(3)-F(17) | 178.15(15) |
| F(18)-P(3)-F(17) | 89.58(14)  |
| F(14)-P(3)-F(16) | 178.79(15) |
| F(15)-P(3)-F(16) | 88.74(14)  |
| F(18)-P(3)-F(16) | 91.27(15)  |
| F(17)-P(3)-F(16) | 89.55(17)  |
| F(14)-P(3)-F(13) | 88.66(13)  |
| F(15)-P(3)-F(13) | 88.83(12)  |
| F(18)-P(3)-F(13) | 178.43(14) |
| F(17)-P(3)-F(13) | 90.48(13)  |
| F(16)-P(3)-F(13) | 90.30(15)  |
| F(24)-P(4)-F(23) | 93.95(19)  |
| F(24)-P(4)-F(20) | 91.90(16)  |
| F(23)-P(4)-F(20) | 91.94(15)  |
| F(24)-P(4)-F(21) | 90.79(17)  |
| F(23)-P(4)-F(21) | 174.50(18) |
| F(20)-P(4)-F(21) | 90.69(13)  |
| F(24)-P(4)-F(22) | 89.00(17)  |
| F(23)-P(4)-F(22) | 89.14(15)  |
| F(20)-P(4)-F(22) | 178.54(16) |
| F(21)-P(4)-F(22) | 88.15(14)  |
| F(24)-P(4)-F(19) | 178.16(19) |
| F(23)-P(4)-F(19) | 87.83(17)  |
| F(20)-P(4)-F(19) | 88.51(13)  |
| F(21)-P(4)-F(19) | 87.42(14)  |
| F(22)-P(4)-F(19) | 90.56(16)  |

|                    |          |
|--------------------|----------|
| O(1)-C(1)-N(1)     | 114.4(2) |
| O(1)-C(1)-C(2)     | 122.8(3) |
| N(1)-C(1)-C(2)     | 122.8(3) |
| C(3)-C(2)-C(1)     | 118.9(3) |
| C(3)-C(2)-H(2A)    | 120.6    |
| C(1)-C(2)-H(2A)    | 120.6    |
| C(2)-C(3)-C(4)     | 119.7(3) |
| C(2)-C(3)-H(3A)    | 120.2    |
| C(4)-C(3)-H(3A)    | 120.2    |
| C(5)-C(4)-C(3)     | 118.7(3) |
| C(5)-C(4)-H(4A)    | 120.7    |
| C(3)-C(4)-H(4A)    | 120.7    |
| N(1)-C(5)-C(4)     | 122.6(3) |
| N(1)-C(5)-C(6)     | 114.8(2) |
| C(4)-C(5)-C(6)     | 122.3(3) |
| N(2)-C(6)-C(7)     | 122.4(3) |
| N(2)-C(6)-C(5)     | 114.4(2) |
| C(7)-C(6)-C(5)     | 123.1(3) |
| C(6)-C(7)-C(8)     | 118.4(3) |
| C(6)-C(7)-H(7A)    | 120.8    |
| C(8)-C(7)-H(7A)    | 120.8    |
| C(9)-C(8)-C(7)     | 120.1(3) |
| C(9)-C(8)-H(8A)    | 119.9    |
| C(7)-C(8)-H(8A)    | 119.9    |
| C(8)-C(9)-C(10)    | 118.8(3) |
| C(8)-C(9)-H(9A)    | 120.6    |
| C(10)-C(9)-H(9A)   | 120.6    |
| O(2)-C(10)-N(2)    | 115.1(2) |
| O(2)-C(10)-C(9)    | 122.8(2) |
| N(2)-C(10)-C(9)    | 122.1(3) |
| N(3)-C(11)-C(12)   | 122.8(3) |
| N(3)-C(11)-H(11A)  | 118.6    |
| C(12)-C(11)-H(11A) | 118.6    |
| C(11)-C(12)-C(13)  | 119.1(3) |
| C(11)-C(12)-H(12A) | 120.5    |
| C(13)-C(12)-H(12A) | 120.5    |

|                    |          |
|--------------------|----------|
| C(14)-C(13)-C(12)  | 118.9(3) |
| C(14)-C(13)-H(13A) | 120.6    |
| C(12)-C(13)-H(13A) | 120.6    |
| C(13)-C(14)-C(15)  | 119.6(3) |
| C(13)-C(14)-H(14A) | 120.2    |
| C(15)-C(14)-H(14A) | 120.2    |
| N(3)-C(15)-C(14)   | 121.5(3) |
| N(3)-C(15)-C(16)   | 114.6(2) |
| C(14)-C(15)-C(16)  | 123.8(3) |
| N(4)-C(16)-C(17)   | 121.3(3) |
| N(4)-C(16)-C(15)   | 114.5(2) |
| C(17)-C(16)-C(15)  | 124.2(3) |
| C(16)-C(17)-C(18)  | 119.7(3) |
| C(16)-C(17)-H(17A) | 120.2    |
| C(18)-C(17)-H(17A) | 120.2    |
| C(17)-C(18)-C(19)  | 119.0(3) |
| C(17)-C(18)-H(18A) | 120.5    |
| C(19)-C(18)-H(18A) | 120.5    |
| C(20)-C(19)-C(18)  | 119.3(3) |
| C(20)-C(19)-H(19A) | 120.3    |
| C(18)-C(19)-H(19A) | 120.3    |
| N(4)-C(20)-C(19)   | 122.3(3) |
| N(4)-C(20)-H(20A)  | 118.8    |
| C(19)-C(20)-H(20A) | 118.8    |
| N(5)-C(21)-C(22)   | 123.3(3) |
| N(5)-C(21)-H(21A)  | 118.3    |
| C(22)-C(21)-H(21A) | 118.3    |
| C(23)-C(22)-C(21)  | 118.9(3) |
| C(23)-C(22)-H(22A) | 120.5    |
| C(21)-C(22)-H(22A) | 120.5    |
| C(22)-C(23)-C(24)  | 119.0(3) |
| C(22)-C(23)-H(23A) | 120.5    |
| C(24)-C(23)-H(23A) | 120.5    |
| C(23)-C(24)-C(25)  | 119.5(3) |
| C(23)-C(24)-H(24A) | 120.3    |
| C(25)-C(24)-H(24A) | 120.3    |

|                    |          |
|--------------------|----------|
| N(5)-C(25)-C(24)   | 121.9(2) |
| N(5)-C(25)-C(26)   | 114.5(2) |
| C(24)-C(25)-C(26)  | 123.5(2) |
| N(6)-C(26)-C(27)   | 121.0(2) |
| N(6)-C(26)-C(25)   | 114.7(2) |
| C(27)-C(26)-C(25)  | 124.2(2) |
| C(26)-C(27)-C(28)  | 119.2(3) |
| C(26)-C(27)-H(27A) | 120.4    |
| C(28)-C(27)-H(27A) | 120.4    |
| C(29)-C(28)-C(27)  | 119.3(2) |
| C(29)-C(28)-H(28A) | 120.4    |
| C(27)-C(28)-H(28A) | 120.4    |
| C(28)-C(29)-C(30)  | 118.9(3) |
| C(28)-C(29)-H(29A) | 120.6    |
| C(30)-C(29)-H(29A) | 120.6    |
| N(6)-C(30)-C(29)   | 122.5(3) |
| N(6)-C(30)-H(30A)  | 118.8    |
| C(29)-C(30)-H(30A) | 118.8    |
| O(3)-C(31)-N(7)    | 114.8(2) |
| O(3)-C(31)-C(32)   | 123.0(2) |
| N(7)-C(31)-C(32)   | 122.2(3) |
| C(33)-C(32)-C(31)  | 119.3(3) |
| C(33)-C(32)-H(32A) | 120.3    |
| C(31)-C(32)-H(32A) | 120.3    |
| C(32)-C(33)-C(34)  | 119.3(3) |
| C(32)-C(33)-H(33A) | 120.4    |
| C(34)-C(33)-H(33A) | 120.4    |
| C(35)-C(34)-C(33)  | 118.9(3) |
| C(35)-C(34)-H(34A) | 120.5    |
| C(33)-C(34)-H(34A) | 120.5    |
| N(7)-C(35)-C(34)   | 122.4(2) |
| N(7)-C(35)-C(36)   | 115.3(2) |
| C(34)-C(35)-C(36)  | 122.4(2) |
| N(8)-C(36)-C(37)   | 123.0(2) |
| N(8)-C(36)-C(35)   | 114.8(2) |
| C(37)-C(36)-C(35)  | 122.2(2) |

|                    |          |
|--------------------|----------|
| C(36)-C(37)-C(38)  | 118.5(3) |
| C(36)-C(37)-H(37A) | 120.8    |
| C(38)-C(37)-H(37A) | 120.8    |
| C(39)-C(38)-C(37)  | 119.5(3) |
| C(39)-C(38)-H(38A) | 120.2    |
| C(37)-C(38)-H(38A) | 120.2    |
| C(38)-C(39)-C(40)  | 119.3(3) |
| C(38)-C(39)-H(39A) | 120.4    |
| C(40)-C(39)-H(39A) | 120.4    |
| O(4)-C(40)-N(8)    | 115.1(2) |
| O(4)-C(40)-C(39)   | 122.2(2) |
| N(8)-C(40)-C(39)   | 122.7(2) |
| N(9)-C(41)-C(42)   | 123.3(3) |
| N(9)-C(41)-H(41A)  | 118.4    |
| C(42)-C(41)-H(41A) | 118.4    |
| C(41)-C(42)-C(43)  | 119.4(3) |
| C(41)-C(42)-H(42A) | 120.3    |
| C(43)-C(42)-H(42A) | 120.3    |
| C(42)-C(43)-C(44)  | 118.5(3) |
| C(42)-C(43)-H(43A) | 120.8    |
| C(44)-C(43)-H(43A) | 120.8    |
| C(45)-C(44)-C(43)  | 120.0(3) |
| C(45)-C(44)-H(44A) | 120.0    |
| C(43)-C(44)-H(44A) | 120.0    |
| N(9)-C(45)-C(44)   | 121.4(2) |
| N(9)-C(45)-C(46)   | 114.5(2) |
| C(44)-C(45)-C(46)  | 124.1(2) |
| N(10)-C(46)-C(47)  | 121.1(2) |
| N(10)-C(46)-C(45)  | 115.3(2) |
| C(47)-C(46)-C(45)  | 123.6(2) |
| C(48)-C(47)-C(46)  | 119.5(3) |
| C(48)-C(47)-H(47A) | 120.2    |
| C(46)-C(47)-H(47A) | 120.2    |
| C(49)-C(48)-C(47)  | 118.9(2) |
| C(49)-C(48)-H(48A) | 120.5    |
| C(47)-C(48)-H(48A) | 120.5    |



|                    |          |
|--------------------|----------|
| C(50)-C(49)-C(48)  | 118.9(3) |
| C(50)-C(49)-H(49A) | 120.6    |
| C(48)-C(49)-H(49A) | 120.6    |
| N(10)-C(50)-C(49)  | 122.5(3) |
| N(10)-C(50)-H(50A) | 118.7    |
| C(49)-C(50)-H(50A) | 118.7    |
| N(11)-C(51)-C(52)  | 121.9(3) |
| N(11)-C(51)-H(51A) | 119.1    |
| C(52)-C(51)-H(51A) | 119.1    |
| C(53)-C(52)-C(51)  | 119.5(3) |
| C(53)-C(52)-H(52A) | 120.3    |
| C(51)-C(52)-H(52A) | 120.3    |
| C(52)-C(53)-C(54)  | 119.0(3) |
| C(52)-C(53)-H(53A) | 120.5    |
| C(54)-C(53)-H(53A) | 120.5    |
| C(53)-C(54)-C(55)  | 119.9(3) |
| C(53)-C(54)-H(54A) | 120.1    |
| C(55)-C(54)-H(54A) | 120.1    |
| N(11)-C(55)-C(54)  | 120.7(3) |
| N(11)-C(55)-C(56)  | 114.7(2) |
| C(54)-C(55)-C(56)  | 124.7(2) |
| N(12)-C(56)-C(57)  | 121.7(3) |
| N(12)-C(56)-C(55)  | 114.6(2) |
| C(57)-C(56)-C(55)  | 123.6(2) |
| C(58)-C(57)-C(56)  | 119.1(3) |
| C(58)-C(57)-H(57A) | 120.5    |
| C(56)-C(57)-H(57A) | 120.5    |
| C(57)-C(58)-C(59)  | 119.5(3) |
| C(57)-C(58)-H(58A) | 120.2    |
| C(59)-C(58)-H(58A) | 120.2    |
| C(60)-C(59)-C(58)  | 118.7(3) |
| C(60)-C(59)-H(59A) | 120.6    |
| C(58)-C(59)-H(59A) | 120.6    |
| N(12)-C(60)-C(59)  | 123.1(3) |
| N(12)-C(60)-H(60A) | 118.4    |
| C(59)-C(60)-H(60A) | 118.4    |

|                     |           |
|---------------------|-----------|
| C(63)-O(5)-C(62)    | 111.9(2)  |
| C(62)-C(61)-H(61A)  | 109.5     |
| C(62)-C(61)-H(61B)  | 109.5     |
| H(61A)-C(61)-H(61B) | 109.5     |
| C(62)-C(61)-H(61C)  | 109.5     |
| H(61A)-C(61)-H(61C) | 109.5     |
| H(61B)-C(61)-H(61C) | 109.5     |
| O(5)-C(62)-C(61)    | 108.9(3)  |
| O(5)-C(62)-H(62A)   | 109.9     |
| C(61)-C(62)-H(62A)  | 109.9     |
| O(5)-C(62)-H(62B)   | 109.9     |
| C(61)-C(62)-H(62B)  | 109.9     |
| H(62A)-C(62)-H(62B) | 108.3     |
| O(5)-C(63)-C(64)    | 108.5(3)  |
| O(5)-C(63)-H(63A)   | 110.0     |
| C(64)-C(63)-H(63A)  | 110.0     |
| O(5)-C(63)-H(63B)   | 110.0     |
| C(64)-C(63)-H(63B)  | 110.0     |
| H(63A)-C(63)-H(63B) | 108.4     |
| C(63)-C(64)-H(64A)  | 109.5     |
| C(63)-C(64)-H(64B)  | 109.5     |
| H(64A)-C(64)-H(64B) | 109.5     |
| C(63)-C(64)-H(64C)  | 109.5     |
| H(64A)-C(64)-H(64C) | 109.5     |
| H(64B)-C(64)-H(64C) | 109.5     |
| C(67)-O(6)-C(66)    | 125.3(9)  |
| C(65)-C(66)-O(6)    | 107.3(11) |
| C(65)-C(66)-H(66A)  | 110.2     |
| O(6)-C(66)-H(66A)   | 110.2     |
| C(65)-C(66)-H(66B)  | 110.2     |
| O(6)-C(66)-H(66B)   | 110.2     |
| H(66A)-C(66)-H(66B) | 108.5     |
| O(6)-C(67)-C(68)    | 118.6(8)  |
| O(6)-C(67)-H(67A)   | 107.7     |
| C(68)-C(67)-H(67A)  | 107.7     |
| O(6)-C(67)-H(67B)   | 107.7     |

|                      |           |
|----------------------|-----------|
| C(68)-C(67)-H(67B)   | 107.7     |
| H(67A)-C(67)-H(67B)  | 107.1     |
| C(67')-O(6')-C(66')  | 123.8(15) |
| C(66')-C(65')-H(65D) | 109.5     |
| C(66')-C(65')-H(65E) | 109.5     |
| H(65D)-C(65')-H(65E) | 109.5     |
| C(66')-C(65')-H(65F) | 109.5     |
| H(65D)-C(65')-H(65F) | 109.5     |
| H(65E)-C(65')-H(65F) | 109.5     |
| C(65')-C(66')-O(6')  | 113.6(16) |
| C(65')-C(66')-H(66C) | 108.8     |
| O(6')-C(66')-H(66C)  | 108.8     |
| C(65')-C(66')-H(66D) | 108.8     |
| O(6')-C(66')-H(66D)  | 108.8     |
| H(66C)-C(66')-H(66D) | 107.7     |
| O(6')-C(67')-C(68')  | 115.5(11) |
| O(6')-C(67')-H(67C)  | 108.4     |
| C(68')-C(67')-H(67C) | 108.4     |
| O(6')-C(67')-H(67D)  | 108.4     |
| C(68')-C(67')-H(67D) | 108.4     |
| H(67C)-C(67')-H(67D) | 107.5     |
| C(67')-C(68')-H(68D) | 109.5     |
| C(67')-C(68')-H(68E) | 109.5     |
| H(68D)-C(68')-H(68E) | 109.5     |
| C(67')-C(68')-H(68F) | 109.5     |
| H(68D)-C(68')-H(68F) | 109.5     |
| H(68E)-C(68')-H(68F) | 109.5     |
| C(71)-O(7)-C(70)     | 114.2(3)  |
| C(70)-C(69)-H(69A)   | 109.5     |
| C(70)-C(69)-H(69B)   | 109.5     |
| H(69A)-C(69)-H(69B)  | 109.5     |
| C(70)-C(69)-H(69C)   | 109.5     |
| H(69A)-C(69)-H(69C)  | 109.5     |
| H(69B)-C(69)-H(69C)  | 109.5     |
| O(7)-C(70)-C(69)     | 112.9(3)  |
| O(7)-C(70)-H(70A)    | 109.0     |

|                      |           |
|----------------------|-----------|
| C(69)-C(70)-H(70A)   | 109.0     |
| O(7)-C(70)-H(70B)    | 109.0     |
| C(69)-C(70)-H(70B)   | 109.0     |
| H(70A)-C(70)-H(70B)  | 107.8     |
| O(7)-C(71)-C(72)     | 109.6(3)  |
| O(7)-C(71)-H(71A)    | 109.8     |
| C(72)-C(71)-H(71A)   | 109.8     |
| O(7)-C(71)-H(71B)    | 109.8     |
| C(72)-C(71)-H(71B)   | 109.8     |
| H(71A)-C(71)-H(71B)  | 108.2     |
| C(71)-C(72)-H(72A)   | 109.5     |
| C(71)-C(72)-H(72B)   | 109.5     |
| H(72A)-C(72)-H(72B)  | 109.5     |
| C(71)-C(72)-H(72C)   | 109.5     |
| H(72A)-C(72)-H(72C)  | 109.5     |
| H(72B)-C(72)-H(72C)  | 109.5     |
| C(74)-O(8)-C(75)     | 112.7(8)  |
| O(8)-C(74)-C(73)     | 110.1(10) |
| O(8)-C(74)-H(74A)    | 109.6     |
| C(73)-C(74)-H(74A)   | 109.6     |
| O(8)-C(74)-H(74B)    | 109.6     |
| C(73)-C(74)-H(74B)   | 109.6     |
| H(74A)-C(74)-H(74B)  | 108.1     |
| O(8)-C(75)-C(76)     | 112.0(9)  |
| O(8)-C(75)-H(75A)    | 109.2     |
| C(76)-C(75)-H(75A)   | 109.2     |
| O(8)-C(75)-H(75B)    | 109.2     |
| C(76)-C(75)-H(75B)   | 109.2     |
| H(75A)-C(75)-H(75B)  | 107.9     |
| C(75')-O(8')-C(74')  | 119.3(16) |
| C(74')-C(73')-H(73D) | 109.5     |
| C(74')-C(73')-H(73E) | 109.5     |
| H(73D)-C(73')-H(73E) | 109.5     |
| C(74')-C(73')-H(73F) | 109.5     |
| H(73D)-C(73')-H(73F) | 109.5     |
| H(73E)-C(73')-H(73F) | 109.5     |

|                      |           |
|----------------------|-----------|
| O(8')-C(74')-C(73')  | 110.0(16) |
| O(8')-C(74')-H(74C)  | 109.7     |
| C(73')-C(74')-H(74C) | 109.7     |
| O(8')-C(74')-H(74D)  | 109.7     |
| C(73')-C(74')-H(74D) | 109.7     |
| H(74C)-C(74')-H(74D) | 108.2     |
| O(8')-C(75')-C(76')  | 114.2(15) |
| O(8')-C(75')-H(75C)  | 108.7     |
| C(76')-C(75')-H(75C) | 108.7     |
| O(8')-C(75')-H(75D)  | 108.7     |
| C(76')-C(75')-H(75D) | 108.7     |
| H(75C)-C(75')-H(75D) | 107.6     |
| C(75')-C(76')-H(76D) | 109.5     |
| C(75')-C(76')-H(76E) | 109.5     |
| H(76D)-C(76')-H(76E) | 109.5     |
| C(75')-C(76')-H(76F) | 109.5     |
| H(76D)-C(76')-H(76F) | 109.5     |
| H(76E)-C(76')-H(76F) | 109.5     |
| C(78)-C(77)-C(82)    | 120.0     |
| C(78)-C(77)-H(77)    | 120.0     |
| C(82)-C(77)-H(77)    | 120.0     |
| C(77)-C(78)-C(79)    | 120.0     |
| C(77)-C(78)-H(78)    | 120.0     |
| C(79)-C(78)-H(78)    | 120.0     |
| C(78)-C(79)-C(80)    | 120.0     |
| C(78)-C(79)-H(79)    | 120.0     |
| C(80)-C(79)-H(79)    | 120.0     |
| C(79)-C(80)-C(81)    | 120.0     |
| C(79)-C(80)-C(83)    | 119.9(6)  |
| C(81)-C(80)-C(83)    | 120.0(7)  |
| C(82)-C(81)-C(80)    | 120.0     |
| C(82)-C(81)-H(81)    | 120.0     |
| C(80)-C(81)-H(81)    | 120.0     |
| C(81)-C(82)-C(77)    | 120.0     |
| C(81)-C(82)-H(82)    | 120.0     |
| C(77)-C(82)-H(82)    | 120.0     |

N(13)-C(83)-C(80)

178(2)

---

Symmetry transformations used to generate equivalent atoms:

Table S9. Anisotropic displacement parameters ( $\text{\AA}^2 \times 10^3$ ) for paul017. The anisotropic displacement factor exponent takes the form:  $-2\rho^2 [ h^2 a^{*2}U^{11} + \dots + 2 h k a^* b^* U^{12} ]$

|       | U <sup>11</sup> | U <sup>22</sup> | U <sup>33</sup> | U <sup>23</sup> | U <sup>13</sup> | U <sup>12</sup> |
|-------|-----------------|-----------------|-----------------|-----------------|-----------------|-----------------|
| Ru(1) | 14(1)           | 20(1)           | 14(1)           | 6(1)            | 2(1)            | 5(1)            |
| Ru(2) | 13(1)           | 20(1)           | 14(1)           | 7(1)            | 2(1)            | 6(1)            |
| N(1)  | 19(1)           | 22(1)           | 15(1)           | 6(1)            | 4(1)            | 6(1)            |
| N(2)  | 16(1)           | 22(1)           | 16(1)           | 6(1)            | 3(1)            | 3(1)            |
| N(3)  | 15(1)           | 21(1)           | 16(1)           | 5(1)            | 2(1)            | 4(1)            |
| N(4)  | 16(1)           | 23(1)           | 18(1)           | 9(1)            | 2(1)            | 4(1)            |
| N(5)  | 21(1)           | 21(1)           | 15(1)           | 7(1)            | 2(1)            | 9(1)            |
| N(6)  | 18(1)           | 18(1)           | 17(1)           | 7(1)            | 2(1)            | 7(1)            |
| N(7)  | 14(1)           | 23(1)           | 14(1)           | 8(1)            | 3(1)            | 6(1)            |
| N(8)  | 14(1)           | 20(1)           | 17(1)           | 7(1)            | 3(1)            | 6(1)            |
| N(9)  | 17(1)           | 19(1)           | 17(1)           | 9(1)            | 3(1)            | 6(1)            |
| N(10) | 15(1)           | 19(1)           | 15(1)           | 6(1)            | 2(1)            | 7(1)            |
| N(11) | 15(1)           | 23(1)           | 16(1)           | 8(1)            | 3(1)            | 7(1)            |
| N(12) | 17(1)           | 21(1)           | 18(1)           | 10(1)           | 5(1)            | 8(1)            |
| O(1)  | 32(1)           | 28(1)           | 21(1)           | 7(1)            | -3(1)           | 15(1)           |
| O(2)  | 20(1)           | 36(1)           | 25(1)           | 3(1)            | -3(1)           | 14(1)           |
| O(3)  | 21(1)           | 40(1)           | 26(1)           | 4(1)            | -1(1)           | 18(1)           |
| O(4)  | 23(1)           | 27(1)           | 22(1)           | 6(1)            | -3(1)           | 13(1)           |
| P(1)  | 20(1)           | 33(1)           | 26(1)           | 13(1)           | 4(1)            | 8(1)            |
| F(1)  | 26(1)           | 40(1)           | 37(1)           | 13(1)           | 0(1)            | 15(1)           |
| F(2)  | 43(1)           | 75(2)           | 25(1)           | 18(1)           | 11(1)           | 28(1)           |
| F(3)  | 50(1)           | 35(1)           | 56(1)           | 22(1)           | 27(1)           | 23(1)           |
| F(4)  | 45(1)           | 75(2)           | 37(1)           | 32(1)           | 22(1)           | 20(1)           |
| F(5)  | 47(1)           | 34(1)           | 74(2)           | 11(1)           | 5(1)            | -2(1)           |
| F(6)  | 26(1)           | 95(2)           | 54(1)           | 36(1)           | 9(1)            | 27(1)           |
| P(2)  | 26(1)           | 32(1)           | 23(1)           | 7(1)            | 2(1)            | 12(1)           |
| F(7)  | 25(1)           | 46(1)           | 37(1)           | 12(1)           | 6(1)            | 13(1)           |
| F(8)  | 52(1)           | 102(2)          | 72(2)           | 62(2)           | 32(1)           | 35(1)           |
| F(9)  | 49(1)           | 37(1)           | 60(2)           | -8(1)           | 9(1)            | 11(1)           |
| F(10) | 95(2)           | 120(2)          | 52(1)           | 59(2)           | 40(1)           | 76(2)           |
| F(11) | 37(1)           | 47(1)           | 91(2)           | -18(1)          | -10(1)          | 10(1)           |

|       |       |        |        |        |        |        |
|-------|-------|--------|--------|--------|--------|--------|
| F(12) | 33(1) | 76(2)  | 48(1)  | 11(1)  | 7(1)   | 31(1)  |
| P(3)  | 32(1) | 30(1)  | 25(1)  | 8(1)   | 0(1)   | 8(1)   |
| F(13) | 35(1) | 58(1)  | 67(2)  | 26(1)  | -13(1) | 13(1)  |
| F(14) | 62(2) | 100(2) | 28(1)  | -5(1)  | 4(1)   | 47(2)  |
| F(15) | 43(1) | 36(1)  | 64(1)  | 21(1)  | 19(1)  | 13(1)  |
| F(16) | 86(2) | 109(2) | 35(1)  | 22(1)  | 26(1)  | -16(2) |
| F(17) | 68(2) | 39(1)  | 115(2) | 34(2)  | -21(2) | -2(1)  |
| F(18) | 34(1) | 51(1)  | 77(2)  | 13(1)  | 14(1)  | 18(1)  |
| P(4)  | 41(1) | 67(1)  | 25(1)  | 2(1)   | 2(1)   | 21(1)  |
| F(19) | 60(2) | 81(2)  | 58(2)  | 9(1)   | -6(1)  | 43(1)  |
| F(20) | 56(1) | 54(1)  | 56(1)  | 13(1)  | 4(1)   | 28(1)  |
| F(21) | 63(2) | 62(2)  | 42(1)  | 3(1)   | 19(1)  | 20(1)  |
| F(22) | 67(2) | 82(2)  | 54(2)  | -24(1) | 21(1)  | 15(1)  |
| F(23) | 81(2) | 100(2) | 64(2)  | 1(2)   | 30(2)  | -9(2)  |
| F(24) | 86(2) | 111(3) | 87(2)  | 55(2)  | -37(2) | 11(2)  |
| C(1)  | 24(1) | 27(1)  | 21(1)  | 11(1)  | 7(1)   | 10(1)  |
| C(2)  | 38(2) | 40(2)  | 25(1)  | 12(1)  | 7(1)   | 23(2)  |
| C(3)  | 55(2) | 38(2)  | 29(2)  | 8(1)   | 11(2)  | 30(2)  |
| C(4)  | 42(2) | 30(2)  | 24(1)  | 5(1)   | 4(1)   | 18(2)  |
| C(5)  | 26(1) | 22(1)  | 17(1)  | 7(1)   | 7(1)   | 8(1)   |
| C(6)  | 21(1) | 22(1)  | 17(1)  | 9(1)   | 7(1)   | 5(1)   |
| C(7)  | 31(2) | 24(1)  | 15(1)  | 5(1)   | 6(1)   | 5(1)   |
| C(8)  | 27(1) | 26(2)  | 17(1)  | 8(1)   | 2(1)   | 2(1)   |
| C(9)  | 21(1) | 28(2)  | 21(1)  | 12(1)  | 0(1)   | 4(1)   |
| C(10) | 16(1) | 24(1)  | 21(1)  | 9(1)   | 4(1)   | 4(1)   |
| C(11) | 21(1) | 22(1)  | 17(1)  | 8(1)   | 3(1)   | 4(1)   |
| C(12) | 24(1) | 29(2)  | 18(1)  | 8(1)   | 6(1)   | 3(1)   |
| C(13) | 26(2) | 39(2)  | 23(1)  | 10(1)  | 10(1)  | 7(1)   |
| C(14) | 29(2) | 32(2)  | 24(1)  | 10(1)  | 14(1)  | 13(1)  |
| C(15) | 17(1) | 24(1)  | 18(1)  | 5(1)   | 2(1)   | 5(1)   |
| C(16) | 18(1) | 26(1)  | 20(1)  | 8(1)   | 4(1)   | 7(1)   |
| C(17) | 28(2) | 33(2)  | 33(2)  | 11(1)  | 11(1)  | 13(1)  |
| C(18) | 40(2) | 35(2)  | 50(2)  | 19(2)  | 18(2)  | 24(2)  |
| C(19) | 32(2) | 33(2)  | 51(2)  | 24(2)  | 15(2)  | 15(1)  |
| C(20) | 23(1) | 28(2)  | 30(2)  | 14(1)  | 7(1)   | 10(1)  |
| C(21) | 24(1) | 27(1)  | 18(1)  | 10(1)  | 5(1)   | 6(1)   |



|       |       |       |       |       |       |       |
|-------|-------|-------|-------|-------|-------|-------|
| C(22) | 32(2) | 32(2) | 20(1) | 12(1) | 9(1)  | 8(1)  |
| C(23) | 30(2) | 29(2) | 26(1) | 10(1) | 14(1) | 7(1)  |
| C(24) | 23(1) | 27(2) | 28(1) | 10(1) | 9(1)  | 8(1)  |
| C(25) | 19(1) | 20(1) | 20(1) | 7(1)  | 6(1)  | 7(1)  |
| C(26) | 17(1) | 20(1) | 20(1) | 6(1)  | 4(1)  | 6(1)  |
| C(27) | 18(1) | 27(2) | 28(1) | 10(1) | 4(1)  | 5(1)  |
| C(28) | 18(1) | 26(2) | 24(1) | 7(1)  | -4(1) | 4(1)  |
| C(29) | 24(1) | 24(1) | 18(1) | 6(1)  | -1(1) | 7(1)  |
| C(30) | 23(1) | 22(1) | 15(1) | 5(1)  | 2(1)  | 7(1)  |
| C(31) | 17(1) | 28(1) | 18(1) | 10(1) | 5(1)  | 8(1)  |
| C(32) | 15(1) | 33(2) | 22(1) | 14(1) | 1(1)  | 5(1)  |
| C(33) | 22(1) | 28(2) | 19(1) | 10(1) | 0(1)  | 2(1)  |
| C(34) | 22(1) | 22(1) | 17(1) | 7(1)  | 1(1)  | 2(1)  |
| C(35) | 15(1) | 23(1) | 16(1) | 9(1)  | 4(1)  | 3(1)  |
| C(36) | 15(1) | 21(1) | 18(1) | 8(1)  | 4(1)  | 5(1)  |
| C(37) | 25(1) | 25(1) | 23(1) | 4(1)  | 3(1)  | 10(1) |
| C(38) | 29(2) | 26(2) | 30(2) | 3(1)  | 7(1)  | 15(1) |
| C(39) | 22(1) | 27(2) | 29(1) | 10(1) | 4(1)  | 12(1) |
| C(40) | 16(1) | 24(1) | 19(1) | 9(1)  | 2(1)  | 7(1)  |
| C(41) | 21(1) | 27(1) | 18(1) | 10(1) | 4(1)  | 7(1)  |
| C(42) | 28(2) | 30(2) | 20(1) | 11(1) | 8(1)  | 7(1)  |
| C(43) | 24(1) | 34(2) | 24(1) | 14(1) | 13(1) | 11(1) |
| C(44) | 18(1) | 27(2) | 27(1) | 11(1) | 7(1)  | 7(1)  |
| C(45) | 16(1) | 19(1) | 20(1) | 9(1)  | 4(1)  | 7(1)  |
| C(46) | 16(1) | 21(1) | 21(1) | 9(1)  | 4(1)  | 8(1)  |
| C(47) | 16(1) | 26(1) | 26(1) | 10(1) | 3(1)  | 5(1)  |
| C(48) | 18(1) | 24(1) | 25(1) | 6(1)  | -2(1) | 4(1)  |
| C(49) | 24(1) | 22(1) | 18(1) | 4(1)  | 0(1)  | 8(1)  |
| C(50) | 20(1) | 22(1) | 18(1) | 5(1)  | 3(1)  | 8(1)  |
| C(51) | 21(1) | 22(1) | 20(1) | 8(1)  | 4(1)  | 7(1)  |
| C(52) | 29(2) | 27(2) | 23(1) | 12(1) | 9(1)  | 8(1)  |
| C(53) | 29(2) | 32(2) | 27(1) | 12(1) | 13(1) | 8(1)  |
| C(54) | 26(1) | 32(2) | 25(1) | 11(1) | 12(1) | 14(1) |
| C(55) | 16(1) | 23(1) | 18(1) | 7(1)  | 4(1)  | 6(1)  |
| C(56) | 18(1) | 24(1) | 19(1) | 8(1)  | 4(1)  | 8(1)  |
| C(57) | 33(2) | 32(2) | 28(2) | 12(1) | 14(1) | 18(1) |

|        |        |        |       |       |       |       |
|--------|--------|--------|-------|-------|-------|-------|
| C(58)  | 46(2)  | 36(2)  | 43(2) | 21(2) | 21(2) | 28(2) |
| C(59)  | 43(2)  | 34(2)  | 47(2) | 26(2) | 24(2) | 24(2) |
| C(60)  | 25(1)  | 30(2)  | 27(1) | 17(1) | 10(1) | 11(1) |
| O(5)   | 22(1)  | 38(1)  | 29(1) | 10(1) | 1(1)  | 14(1) |
| C(61)  | 56(2)  | 70(3)  | 41(2) | 30(2) | 15(2) | 35(2) |
| C(62)  | 35(2)  | 61(2)  | 30(2) | 12(2) | -6(1) | 19(2) |
| C(63)  | 22(2)  | 42(2)  | 50(2) | 21(2) | 7(1)  | 14(1) |
| C(64)  | 43(2)  | 76(3)  | 52(2) | 37(2) | 20(2) | 32(2) |
| O(6)   | 29(3)  | 60(4)  | 67(3) | 20(3) | -5(2) | 29(3) |
| C(65)  | 66(5)  | 77(9)  | 82(4) | -5(6) | 32(4) | 11(7) |
| C(66)  | 24(3)  | 40(4)  | 86(4) | 15(3) | 5(3)  | 14(3) |
| C(67)  | 48(3)  | 57(4)  | 65(4) | 16(3) | 8(3)  | 24(3) |
| C(68)  | 118(8) | 97(9)  | 40(5) | 28(5) | 32(5) | 79(7) |
| O(6')  | 41(4)  | 36(4)  | 53(3) | 13(3) | 8(3)  | 19(3) |
| C(65') | 51(6)  | 30(6)  | 66(5) | 9(4)  | 25(5) | 7(5)  |
| C(66') | 27(4)  | 47(5)  | 65(4) | 8(4)  | 12(4) | 16(4) |
| C(67') | 49(4)  | 57(5)  | 57(4) | 13(3) | -4(3) | 35(4) |
| C(68') | 80(8)  | 33(6)  | 43(6) | 17(5) | -3(5) | 22(6) |
| O(7)   | 37(1)  | 44(1)  | 33(1) | 14(1) | 2(1)  | 21(1) |
| C(69)  | 73(3)  | 80(3)  | 53(2) | 38(2) | 26(2) | 51(3) |
| C(70)  | 49(2)  | 55(2)  | 52(2) | 31(2) | 14(2) | 23(2) |
| C(71)  | 45(2)  | 69(3)  | 65(3) | 30(2) | 17(2) | 33(2) |
| C(72)  | 49(2)  | 51(2)  | 63(3) | 22(2) | 19(2) | 19(2) |
| O(8)   | 30(2)  | 54(2)  | 31(3) | 5(2)  | 3(2)  | 26(2) |
| C(73)  | 66(4)  | 42(3)  | 52(3) | 12(3) | 33(3) | 18(3) |
| C(74)  | 58(3)  | 62(4)  | 42(4) | 10(3) | 16(3) | 32(3) |
| C(75)  | 46(5)  | 67(4)  | 33(3) | 11(3) | -1(3) | 28(4) |
| C(76)  | 66(8)  | 67(7)  | 48(7) | 23(6) | 12(5) | 29(5) |
| O(8')  | 43(4)  | 59(4)  | 32(4) | 7(3)  | 5(3)  | 21(4) |
| C(73') | 57(5)  | 53(6)  | 48(6) | 16(5) | 18(4) | 24(5) |
| C(74') | 51(4)  | 60(5)  | 35(4) | 0(4)  | 8(4)  | 28(4) |
| C(75') | 35(5)  | 61(5)  | 35(4) | 7(4)  | 8(4)  | 26(4) |
| C(76') | 46(8)  | 50(8)  | 30(6) | 2(5)  | 5(6)  | 22(6) |
| C(77)  | 35(5)  | 52(10) | 51(9) | 32(8) | 8(6)  | 15(7) |
| C(78)  | 42(4)  | 52(5)  | 33(3) | 18(3) | 9(3)  | 24(4) |
| C(79)  | 47(5)  | 49(5)  | 41(4) | 26(4) | 17(4) | 34(4) |

|       |         |       |       |       |        |       |
|-------|---------|-------|-------|-------|--------|-------|
| C(80) | 48(5)   | 50(5) | 36(4) | 20(4) | 18(4)  | 28(4) |
| C(81) | 34(4)   | 50(5) | 38(4) | 30(4) | 10(3)  | 23(4) |
| C(82) | 42(4)   | 51(4) | 45(4) | 28(4) | 17(3)  | 27(4) |
| C(83) | 67(7)   | 48(6) | 42(5) | 17(4) | 6(5)   | 27(5) |
| N(13) | 122(10) | 65(7) | 67(7) | 17(5) | -12(6) | 45(7) |

---

Table S10. Hydrogen coordinates ( $\times 10^4$ ) and isotropic displacement parameters ( $\text{\AA}^2 \times 10^{-3}$ ) for paul017.

|        | x         | y       | z        | U(eq) |
|--------|-----------|---------|----------|-------|
| H(1)   | -4127(16) | 8315(6) | 7402(11) | 42    |
| H(2)   | 160(20)   | 7713(2) | 9531(10) | 44    |
| H(3)   | 10160(20) | 7422(2) | 4480(9)  | 46    |
| H(4)   | 5719(18)  | 8169(5) | 2700(8)  | 38    |
| H(2A)  | -4079     | 9708    | 8177     | 39    |
| H(3A)  | -3256     | 10812   | 9378     | 47    |
| H(4A)  | -2067     | 10609   | 10176    | 40    |
| H(7A)  | -1067     | 10289   | 10873    | 30    |
| H(8A)  | 229       | 10002   | 11433    | 31    |
| H(9A)  | 644       | 8859    | 10716    | 29    |
| H(11A) | -1903     | 8814    | 7682     | 25    |
| H(12A) | -992      | 9000    | 6872     | 30    |
| H(13A) | -243      | 7981    | 6473     | 36    |
| H(14A) | -471      | 6775    | 6875     | 33    |
| H(17A) | -774      | 5677    | 7291     | 37    |
| H(18A) | -974      | 4676    | 7926     | 45    |
| H(19A) | -1792     | 4842    | 8842     | 42    |
| H(20A) | -2401     | 5971    | 9088     | 31    |
| H(21A) | -2198     | 7838    | 10312    | 28    |
| H(22A) | -3162     | 7577    | 11066    | 33    |
| H(23A) | -4745     | 6796    | 10480    | 34    |
| H(24A) | -5318     | 6322    | 9144     | 31    |
| H(27A) | -5757     | 5995    | 7895     | 31    |
| H(28A) | -6062     | 5470    | 6555     | 31    |
| H(29A) | -4822     | 5623    | 6023     | 28    |
| H(30A) | -3336     | 6437    | 6825     | 26    |
| H(32A) | 10844     | 8673    | 5587     | 29    |
| H(33A) | 10591     | 9922    | 6322     | 30    |
| H(34A) | 9243      | 10203   | 5869     | 26    |
| H(37A) | 8040      | 10396   | 5396     | 31    |

|        |      |       |      |     |
|--------|------|-------|------|-----|
| H(38A) | 6696 | 10565 | 4766 | 35  |
| H(39A) | 5783 | 9501  | 3578 | 31  |
| H(41A) | 7841 | 7726  | 5377 | 27  |
| H(42A) | 6858 | 7628  | 6135 | 31  |
| H(43A) | 5262 | 6908  | 5558 | 31  |
| H(44A) | 4710 | 6303  | 4215 | 28  |
| H(47A) | 4301 | 5760  | 2967 | 28  |
| H(48A) | 3971 | 5269  | 1625 | 29  |
| H(49A) | 5198 | 5522  | 1080 | 28  |
| H(50A) | 6683 | 6357  | 1877 | 25  |
| H(51A) | 8139 | 8685  | 2764 | 25  |
| H(52A) | 8895 | 8789  | 1837 | 31  |
| H(53A) | 9484 | 7683  | 1306 | 34  |
| H(54A) | 9291 | 6484  | 1714 | 31  |
| H(57A) | 9051 | 5407  | 2164 | 35  |
| H(58A) | 8838 | 4381  | 2769 | 43  |
| H(59A) | 8123 | 4583  | 3755 | 42  |
| H(60A) | 7637 | 5790  | 4103 | 30  |
| H(61A) | 4602 | 8497  | 896  | 76  |
| H(61B) | 5365 | 8412  | 1526 | 76  |
| H(61C) | 4957 | 9199  | 1758 | 76  |
| H(62A) | 3503 | 8167  | 1550 | 54  |
| H(62B) | 3906 | 7374  | 1308 | 54  |
| H(63A) | 3609 | 6940  | 2388 | 44  |
| H(63B) | 3113 | 7672  | 2530 | 44  |
| H(64A) | 3606 | 7420  | 3670 | 76  |
| H(64B) | 4107 | 8428  | 3776 | 76  |
| H(64C) | 4651 | 7739  | 3637 | 76  |
| H(65A) | 1835 | 7062  | 3254 | 127 |
| H(65B) | 917  | 7234  | 3408 | 127 |
| H(65C) | 1060 | 6317  | 3372 | 127 |
| H(66A) | 2085 | 8003  | 4555 | 64  |
| H(66B) | 2357 | 7134  | 4499 | 64  |
| H(67A) | 1704 | 6587  | 5333 | 70  |
| H(67B) | 848  | 5915  | 4619 | 70  |
| H(68A) | 437  | 5899  | 5667 | 111 |

|        |      |      |       |     |
|--------|------|------|-------|-----|
| H(68B) | -125 | 6418 | 5305  | 111 |
| H(68C) | 767  | 6958 | 6032  | 111 |
| H(65D) | 1764 | 6817 | 3184  | 77  |
| H(65E) | 769  | 6733 | 3315  | 77  |
| H(65F) | 1325 | 6144 | 3568  | 77  |
| H(66C) | 1883 | 8008 | 4242  | 59  |
| H(66D) | 2454 | 7428 | 4488  | 59  |
| H(67C) | 1991 | 7632 | 5848  | 67  |
| H(67D) | 1926 | 6705 | 5250  | 67  |
| H(68D) | 1031 | 6838 | 6228  | 81  |
| H(68E) | 707  | 5998 | 5445  | 81  |
| H(68F) | 274  | 6769 | 5502  | 81  |
| H(69A) | 5627 | 9649 | 5545  | 88  |
| H(69B) | 4619 | 9003 | 5439  | 88  |
| H(69C) | 5432 | 8610 | 5333  | 88  |
| H(70A) | 6217 | 9385 | 6639  | 58  |
| H(70B) | 5415 | 9793 | 6748  | 58  |
| H(71A) | 3781 | 8285 | 6042  | 67  |
| H(71B) | 4084 | 8969 | 6910  | 67  |
| H(72A) | 3056 | 7587 | 6780  | 80  |
| H(72B) | 4040 | 7799 | 7356  | 80  |
| H(72C) | 3757 | 7114 | 6493  | 80  |
| H(73A) | 1549 | 7041 | 8099  | 79  |
| H(73B) | 2015 | 7999 | 8768  | 79  |
| H(73C) | 914  | 7557 | 8457  | 79  |
| H(74A) | 1052 | 6408 | 8921  | 64  |
| H(74B) | 2124 | 6989 | 9329  | 64  |
| H(75A) | 1425 | 7684 | 10891 | 61  |
| H(75B) | 1946 | 7064 | 10481 | 61  |
| H(76A) | 637  | 6220 | 10721 | 88  |
| H(76B) | 531  | 5905 | 9821  | 88  |
| H(76C) | -15  | 6525 | 10185 | 88  |
| H(73D) | 2466 | 7202 | 8482  | 78  |
| H(73E) | 2828 | 7394 | 9378  | 78  |
| H(73F) | 2536 | 8119 | 9102  | 78  |
| H(74C) | 996  | 7110 | 8570  | 62  |

|        |      |       |       |    |
|--------|------|-------|-------|----|
| H(74D) | 1310 | 6445  | 8924  | 62 |
| H(75C) | 1762 | 7826  | 10821 | 53 |
| H(75D) | 2093 | 7089  | 10312 | 53 |
| H(76D) | 955  | 6549  | 10926 | 67 |
| H(76E) | 709  | 5997  | 10028 | 67 |
| H(76F) | 214  | 6698  | 10326 | 67 |
| H(77)  | 4665 | 7954  | 8903  | 52 |
| H(78)  | 3735 | 8737  | 8559  | 49 |
| H(79)  | 4025 | 10202 | 9347  | 47 |
| H(81)  | 6177 | 10100 | 10825 | 43 |
| H(82)  | 5887 | 8635  | 10036 | 48 |

---

Table S11. Hydrogen bonds for paul017 [ $\text{\AA}$  and  $^\circ$ ].

| D-H...A             | d(D-H) | d(H...A) | d(D...A)  | $\angle(\text{DHA})$ |
|---------------------|--------|----------|-----------|----------------------|
| O(1)-H(1)...O(7)#1  | 0.67   | 1.95     | 2.609(3)  | 168.4                |
| O(2)-H(2)...O(8)    | 0.77   | 1.85     | 2.601(14) | 166.0                |
| O(2)-H(2)...O(8')   | 0.77   | 1.88     | 2.62(3)   | 161.3                |
| O(3)-H(3)...O(6)#2  | 0.76   | 1.82     | 2.567(7)  | 166.4                |
| O(3)-H(3)...O(6')#2 | 0.76   | 1.87     | 2.629(14) | 177.1                |
| O(4)-H(4)...O(5)    | 0.66   | 2.03     | 2.649(3)  | 156.5                |

Symmetry transformations used to generate equivalent atoms:

#1  $x-1, y, z$  #2  $x+1, y, z$



[Ru(bpy)<sub>2</sub>(66'bpy(O<sup>-</sup>)<sub>2</sub>)] (paul020s)

Table S12. Crystal data and structure refinement for paul020s.

|                                   |                                                                           |                 |
|-----------------------------------|---------------------------------------------------------------------------|-----------------|
| Identification code               | paul020s                                                                  |                 |
| Empirical formula                 | C <sub>33</sub> H <sub>28.50</sub> N <sub>6.50</sub> O <sub>2.50</sub> Ru |                 |
| Formula weight                    | 657.19                                                                    |                 |
| Temperature                       | 120(2) K                                                                  |                 |
| Wavelength                        | 0.71073 Å                                                                 |                 |
| Crystal system                    | Triclinic                                                                 |                 |
| Space group                       | P-1                                                                       |                 |
| Unit cell dimensions              | a = 9.4108(7) Å                                                           | ∠ = 84.343(4)°. |
|                                   | b = 12.2807(9) Å                                                          | ∠ = 88.748(4)°. |
|                                   | c = 13.0032(10) Å                                                         | ∠ = 73.877(4)°. |
| Volume                            | 1436.63(19) Å <sup>3</sup>                                                |                 |
| Z                                 | 2                                                                         |                 |
| Density (calculated)              | 1.519 Mg/m <sup>3</sup>                                                   |                 |
| Absorption coefficient            | 0.591 mm <sup>-1</sup>                                                    |                 |
| F(000)                            | 672                                                                       |                 |
| Crystal size                      | 0.18 x 0.18 x 0.10 mm <sup>3</sup>                                        |                 |
| Theta range for data collection   | 1.57 to 31.79°.                                                           |                 |
| Index ranges                      | -13 ≤ h ≤ 13, -18 ≤ k ≤ 18, -19 ≤ l ≤ 16                                  |                 |
| Reflections collected             | 26434                                                                     |                 |
| Independent reflections           | 9615 [R(int) = 0.0293]                                                    |                 |
| Completeness to theta = 31.79°    | 98.1 %                                                                    |                 |
| Absorption correction             | Semi-empirical from equivalents                                           |                 |
| Max. and min. transmission        | 0.9433 and 0.9011                                                         |                 |
| Refinement method                 | Full-matrix least-squares on F <sup>2</sup>                               |                 |
| Data / restraints / parameters    | 9615 / 0 / 352                                                            |                 |
| Goodness-of-fit on F <sup>2</sup> | 1.024                                                                     |                 |
| Final R indices [I > 2σ(I)]       | R1 = 0.0368, wR2 = 0.0854                                                 |                 |
| R indices (all data)              | R1 = 0.0478, wR2 = 0.0889                                                 |                 |
| Largest diff. peak and hole       | 0.778 and -0.513 e.Å <sup>-3</sup>                                        |                 |

Table S13. Atomic coordinates ( $\times 10^4$ ) and equivalent isotropic displacement parameters ( $\text{\AA}^2 \times 10^3$ ) for paul020s.  $U(\text{eq})$  is defined as one third of the trace of the orthogonalized  $U^{ij}$  tensor.

|       | x        | y       | z        | U(eq) |
|-------|----------|---------|----------|-------|
| Ru(1) | 6297(1)  | 6956(1) | 7186(1)  | 20(1) |
| N(1)  | 8278(2)  | 7184(2) | 6560(1)  | 29(1) |
| N(2)  | 7647(2)  | 5272(1) | 7219(1)  | 23(1) |
| N(3)  | 6843(2)  | 6995(1) | 8692(1)  | 22(1) |
| N(4)  | 4497(2)  | 6630(1) | 7946(1)  | 20(1) |
| N(5)  | 5559(2)  | 7010(1) | 5704(1)  | 22(1) |
| N(6)  | 4998(2)  | 8600(1) | 6948(1)  | 26(1) |
| O(1)  | 7728(2)  | 9108(1) | 6621(1)  | 44(1) |
| O(2)  | 5984(2)  | 4383(1) | 7982(1)  | 28(1) |
| C(1)  | 8561(2)  | 8225(2) | 6306(2)  | 37(1) |
| C(2)  | 9844(3)  | 8217(3) | 5649(2)  | 49(1) |
| C(3)  | 10741(3) | 7244(3) | 5347(2)  | 50(1) |
| C(4)  | 10497(2) | 6209(2) | 5692(2)  | 42(1) |
| C(5)  | 9283(2)  | 6211(2) | 6312(1)  | 31(1) |
| C(6)  | 9012(2)  | 5145(2) | 6784(1)  | 30(1) |
| C(7)  | 10078(2) | 4104(2) | 6829(2)  | 40(1) |
| C(8)  | 9745(2)  | 3147(2) | 7333(2)  | 42(1) |
| C(9)  | 8389(2)  | 3248(2) | 7743(2)  | 36(1) |
| C(10) | 7264(2)  | 4314(2) | 7659(1)  | 26(1) |
| C(11) | 8062(2)  | 7239(2) | 9021(2)  | 30(1) |
| C(12) | 8375(2)  | 7228(2) | 10054(2) | 31(1) |
| C(13) | 7406(2)  | 6942(2) | 10794(1) | 29(1) |
| C(14) | 6149(2)  | 6706(2) | 10472(1) | 25(1) |
| C(15) | 5884(2)  | 6740(2) | 9418(1)  | 20(1) |
| C(16) | 4563(2)  | 6537(1) | 8992(1)  | 20(1) |
| C(17) | 3463(2)  | 6259(2) | 9608(1)  | 24(1) |
| C(18) | 2248(2)  | 6080(2) | 9140(2)  | 27(1) |
| C(19) | 2158(2)  | 6210(2) | 8068(2)  | 29(1) |
| C(20) | 3292(2)  | 6483(2) | 7499(1)  | 24(1) |
| C(21) | 5918(2)  | 6148(2) | 5096(1)  | 26(1) |
| C(22) | 5411(2)  | 6264(2) | 4088(1)  | 30(1) |

|       |         |          |         |       |
|-------|---------|----------|---------|-------|
| C(23) | 4496(2) | 7288(2)  | 3680(2) | 33(1) |
| C(24) | 4107(2) | 8183(2)  | 4290(1) | 30(1) |
| C(25) | 4647(2) | 8025(2)  | 5302(1) | 23(1) |
| C(26) | 4316(2) | 8913(2)  | 6012(1) | 26(1) |
| C(27) | 3381(2) | 9995(2)  | 5758(2) | 34(1) |
| C(28) | 3143(3) | 10771(2) | 6480(2) | 42(1) |
| C(29) | 3831(3) | 10448(2) | 7437(2) | 44(1) |
| C(30) | 4739(3) | 9372(2)  | 7644(2) | 38(1) |

---

Table S14. Bond lengths [ $\text{\AA}$ ] and angles [ $^\circ$ ] for paul020s.

---

|             |            |
|-------------|------------|
| Ru(1)-N(3)  | 2.0439(14) |
| Ru(1)-N(6)  | 2.0467(16) |
| Ru(1)-N(5)  | 2.0511(14) |
| Ru(1)-N(4)  | 2.0567(15) |
| Ru(1)-N(1)  | 2.0969(15) |
| Ru(1)-N(2)  | 2.1020(16) |
| N(1)-C(5)   | 1.364(3)   |
| N(1)-C(1)   | 1.384(3)   |
| N(2)-C(6)   | 1.367(2)   |
| N(2)-C(10)  | 1.391(3)   |
| N(3)-C(11)  | 1.351(2)   |
| N(3)-C(15)  | 1.365(2)   |
| N(4)-C(20)  | 1.348(2)   |
| N(4)-C(16)  | 1.356(2)   |
| N(5)-C(21)  | 1.347(2)   |
| N(5)-C(25)  | 1.364(2)   |
| N(6)-C(30)  | 1.345(3)   |
| N(6)-C(26)  | 1.359(2)   |
| O(1)-C(1)   | 1.249(3)   |
| O(2)-C(10)  | 1.251(2)   |
| C(1)-C(2)   | 1.462(3)   |
| C(2)-C(3)   | 1.346(4)   |
| C(3)-C(4)   | 1.384(4)   |
| C(4)-C(5)   | 1.383(3)   |
| C(5)-C(6)   | 1.475(3)   |
| C(6)-C(7)   | 1.385(3)   |
| C(7)-C(8)   | 1.398(3)   |
| C(8)-C(9)   | 1.350(3)   |
| C(9)-C(10)  | 1.433(3)   |
| C(11)-C(12) | 1.379(3)   |
| C(12)-C(13) | 1.397(3)   |
| C(13)-C(14) | 1.378(2)   |
| C(14)-C(15) | 1.391(2)   |
| C(15)-C(16) | 1.465(2)   |

|                  |            |
|------------------|------------|
| C(16)-C(17)      | 1.391(2)   |
| C(17)-C(18)      | 1.387(2)   |
| C(18)-C(19)      | 1.389(3)   |
| C(19)-C(20)      | 1.383(3)   |
| C(21)-C(22)      | 1.385(3)   |
| C(22)-C(23)      | 1.376(3)   |
| C(23)-C(24)      | 1.381(3)   |
| C(24)-C(25)      | 1.397(2)   |
| C(25)-C(26)      | 1.461(3)   |
| C(26)-C(27)      | 1.387(3)   |
| C(27)-C(28)      | 1.374(3)   |
| C(28)-C(29)      | 1.385(3)   |
| C(29)-C(30)      | 1.364(3)   |
|                  |            |
| N(3)-Ru(1)-N(6)  | 97.35(6)   |
| N(3)-Ru(1)-N(5)  | 174.74(6)  |
| N(6)-Ru(1)-N(5)  | 78.47(6)   |
| N(3)-Ru(1)-N(4)  | 78.63(6)   |
| N(6)-Ru(1)-N(4)  | 85.43(6)   |
| N(5)-Ru(1)-N(4)  | 97.75(6)   |
| N(3)-Ru(1)-N(1)  | 95.85(6)   |
| N(6)-Ru(1)-N(1)  | 99.00(7)   |
| N(5)-Ru(1)-N(1)  | 88.00(6)   |
| N(4)-Ru(1)-N(1)  | 173.38(6)  |
| N(3)-Ru(1)-N(2)  | 89.79(6)   |
| N(6)-Ru(1)-N(2)  | 172.49(6)  |
| N(5)-Ru(1)-N(2)  | 94.53(6)   |
| N(4)-Ru(1)-N(2)  | 98.34(6)   |
| N(1)-Ru(1)-N(2)  | 77.83(7)   |
| C(5)-N(1)-C(1)   | 119.57(17) |
| C(5)-N(1)-Ru(1)  | 114.88(13) |
| C(1)-N(1)-Ru(1)  | 125.28(15) |
| C(6)-N(2)-C(10)  | 119.27(16) |
| C(6)-N(2)-Ru(1)  | 115.51(13) |
| C(10)-N(2)-Ru(1) | 125.21(12) |
| C(11)-N(3)-C(15) | 118.14(15) |

|                   |            |
|-------------------|------------|
| C(11)-N(3)-Ru(1)  | 125.71(12) |
| C(15)-N(3)-Ru(1)  | 116.15(11) |
| C(20)-N(4)-C(16)  | 118.03(15) |
| C(20)-N(4)-Ru(1)  | 126.09(12) |
| C(16)-N(4)-Ru(1)  | 115.86(11) |
| C(21)-N(5)-C(25)  | 117.83(15) |
| C(21)-N(5)-Ru(1)  | 125.98(13) |
| C(25)-N(5)-Ru(1)  | 116.17(12) |
| C(30)-N(6)-C(26)  | 118.11(18) |
| C(30)-N(6)-Ru(1)  | 125.58(14) |
| C(26)-N(6)-Ru(1)  | 116.28(13) |
| O(1)-C(1)-N(1)    | 120.16(19) |
| O(1)-C(1)-C(2)    | 123.5(2)   |
| N(1)-C(1)-C(2)    | 116.4(2)   |
| C(3)-C(2)-C(1)    | 121.8(2)   |
| C(2)-C(3)-C(4)    | 120.1(2)   |
| C(5)-C(4)-C(3)    | 118.3(2)   |
| N(1)-C(5)-C(4)    | 123.2(2)   |
| N(1)-C(5)-C(6)    | 114.98(16) |
| C(4)-C(5)-C(6)    | 121.8(2)   |
| N(2)-C(6)-C(7)    | 122.4(2)   |
| N(2)-C(6)-C(5)    | 114.71(18) |
| C(7)-C(6)-C(5)    | 122.81(18) |
| C(6)-C(7)-C(8)    | 118.9(2)   |
| C(9)-C(8)-C(7)    | 119.6(2)   |
| C(8)-C(9)-C(10)   | 121.6(2)   |
| O(2)-C(10)-N(2)   | 121.08(17) |
| O(2)-C(10)-C(9)   | 121.01(19) |
| N(2)-C(10)-C(9)   | 117.90(18) |
| N(3)-C(11)-C(12)  | 122.52(18) |
| C(11)-C(12)-C(13) | 119.09(17) |
| C(14)-C(13)-C(12) | 119.09(17) |
| C(13)-C(14)-C(15) | 119.27(17) |
| N(3)-C(15)-C(14)  | 121.87(15) |
| N(3)-C(15)-C(16)  | 114.40(14) |
| C(14)-C(15)-C(16) | 123.71(16) |

|                   |            |
|-------------------|------------|
| N(4)-C(16)-C(17)  | 122.24(15) |
| N(4)-C(16)-C(15)  | 114.80(15) |
| C(17)-C(16)-C(15) | 122.96(15) |
| C(18)-C(17)-C(16) | 119.17(16) |
| C(17)-C(18)-C(19) | 118.58(17) |
| C(20)-C(19)-C(18) | 119.45(17) |
| N(4)-C(20)-C(19)  | 122.47(16) |
| N(5)-C(21)-C(22)  | 122.50(18) |
| C(23)-C(22)-C(21) | 119.74(19) |
| C(22)-C(23)-C(24) | 118.81(17) |
| C(23)-C(24)-C(25) | 119.33(19) |
| N(5)-C(25)-C(24)  | 121.78(17) |
| N(5)-C(25)-C(26)  | 114.29(15) |
| C(24)-C(25)-C(26) | 123.93(18) |
| N(6)-C(26)-C(27)  | 122.12(18) |
| N(6)-C(26)-C(25)  | 114.77(17) |
| C(27)-C(26)-C(25) | 123.12(18) |
| C(28)-C(27)-C(26) | 118.7(2)   |
| C(27)-C(28)-C(29) | 119.1(2)   |
| C(30)-C(29)-C(28) | 119.7(2)   |
| N(6)-C(30)-C(29)  | 122.3(2)   |

---

Symmetry transformations used to generate equivalent atoms:

Table S15. Anisotropic displacement parameters ( $\text{\AA}^2 \times 10^3$ ) for paul020s. The anisotropic displacement factor exponent takes the form:  $-2\rho^2 [ h^2 a^{*2} U^{11} + \dots + 2 h k a^* b^* U^{12} ]$

|       | U <sup>11</sup> | U <sup>22</sup> | U <sup>33</sup> | U <sup>23</sup> | U <sup>13</sup> | U <sup>12</sup> |
|-------|-----------------|-----------------|-----------------|-----------------|-----------------|-----------------|
| Ru(1) | 18(1)           | 32(1)           | 13(1)           | -5(1)           | 0(1)            | -10(1)          |
| N(1)  | 24(1)           | 52(1)           | 16(1)           | -1(1)           | -1(1)           | -20(1)          |
| N(2)  | 17(1)           | 38(1)           | 15(1)           | -7(1)           | -2(1)           | -6(1)           |
| N(3)  | 20(1)           | 32(1)           | 16(1)           | -6(1)           | 0(1)            | -9(1)           |
| N(4)  | 17(1)           | 25(1)           | 17(1)           | -5(1)           | -1(1)           | -5(1)           |
| N(5)  | 19(1)           | 33(1)           | 15(1)           | -3(1)           | 1(1)            | -11(1)          |
| N(6)  | 29(1)           | 29(1)           | 21(1)           | -4(1)           | 2(1)            | -11(1)          |
| O(1)  | 45(1)           | 48(1)           | 46(1)           | 14(1)           | -12(1)          | -29(1)          |
| O(2)  | 30(1)           | 32(1)           | 20(1)           | -4(1)           | 4(1)            | -8(1)           |
| C(1)  | 32(1)           | 54(1)           | 28(1)           | 12(1)           | -10(1)          | -23(1)          |
| C(2)  | 43(1)           | 77(2)           | 35(1)           | 23(1)           | -12(1)          | -38(1)          |
| C(3)  | 28(1)           | 96(2)           | 27(1)           | 6(1)            | -2(1)           | -25(1)          |
| C(4)  | 24(1)           | 84(2)           | 21(1)           | -9(1)           | 2(1)            | -20(1)          |
| C(5)  | 18(1)           | 65(1)           | 15(1)           | -10(1)          | -2(1)           | -15(1)          |
| C(6)  | 18(1)           | 54(1)           | 19(1)           | -16(1)          | -1(1)           | -10(1)          |
| C(7)  | 19(1)           | 63(2)           | 37(1)           | -21(1)          | 0(1)            | -4(1)           |
| C(8)  | 29(1)           | 45(1)           | 50(1)           | -19(1)          | -8(1)           | 0(1)            |
| C(9)  | 33(1)           | 36(1)           | 37(1)           | -9(1)           | -11(1)          | -4(1)           |
| C(10) | 26(1)           | 36(1)           | 14(1)           | -8(1)           | -6(1)           | -4(1)           |
| C(11) | 25(1)           | 48(1)           | 22(1)           | -8(1)           | 0(1)            | -17(1)          |
| C(12) | 27(1)           | 49(1)           | 24(1)           | -12(1)          | -4(1)           | -16(1)          |
| C(13) | 30(1)           | 41(1)           | 17(1)           | -8(1)           | -5(1)           | -9(1)           |
| C(14) | 26(1)           | 31(1)           | 18(1)           | -4(1)           | -1(1)           | -8(1)           |
| C(15) | 19(1)           | 25(1)           | 16(1)           | -4(1)           | -1(1)           | -6(1)           |
| C(16) | 18(1)           | 23(1)           | 16(1)           | -5(1)           | -1(1)           | -4(1)           |
| C(17) | 21(1)           | 32(1)           | 17(1)           | -3(1)           | 2(1)            | -7(1)           |
| C(18) | 19(1)           | 38(1)           | 26(1)           | -3(1)           | 3(1)            | -10(1)          |
| C(19) | 18(1)           | 45(1)           | 25(1)           | -6(1)           | -1(1)           | -10(1)          |
| C(20) | 19(1)           | 35(1)           | 18(1)           | -4(1)           | -2(1)           | -8(1)           |
| C(21) | 25(1)           | 36(1)           | 20(1)           | -6(1)           | 0(1)            | -11(1)          |
| C(22) | 32(1)           | 42(1)           | 19(1)           | -8(1)           | 0(1)            | -15(1)          |



|       |       |       |       |        |       |        |
|-------|-------|-------|-------|--------|-------|--------|
| C(23) | 36(1) | 51(1) | 18(1) | 0(1)   | -6(1) | -23(1) |
| C(24) | 30(1) | 40(1) | 22(1) | 4(1)   | -6(1) | -17(1) |
| C(25) | 20(1) | 33(1) | 20(1) | 0(1)   | 0(1)  | -13(1) |
| C(26) | 24(1) | 32(1) | 24(1) | -1(1)  | 3(1)  | -13(1) |
| C(27) | 34(1) | 35(1) | 32(1) | 3(1)   | 3(1)  | -9(1)  |
| C(28) | 45(1) | 30(1) | 47(1) | -1(1)  | 10(1) | -6(1)  |
| C(29) | 57(2) | 35(1) | 38(1) | -12(1) | 12(1) | -11(1) |
| C(30) | 52(1) | 38(1) | 27(1) | -10(1) | 4(1)  | -14(1) |

---

Table S16. Hydrogen coordinates ( $\times 10^4$ ) and isotropic displacement parameters ( $\text{\AA}^2 \times 10^{-3}$ ) for paul020s.

|        | x     | y     | z     | U(eq) |
|--------|-------|-------|-------|-------|
| H(2A)  | 10050 | 8918  | 5429  | 59    |
| H(3A)  | 11542 | 7268  | 4896  | 60    |
| H(4A)  | 11146 | 5515  | 5507  | 50    |
| H(7A)  | 11019 | 4042  | 6522  | 48    |
| H(8A)  | 10469 | 2429  | 7387  | 51    |
| H(9A)  | 8175  | 2597  | 8095  | 43    |
| H(11A) | 8729  | 7426  | 8521  | 36    |
| H(12A) | 9236  | 7411  | 10259 | 38    |
| H(13A) | 7613  | 6912  | 11510 | 35    |
| H(14A) | 5469  | 6521  | 10963 | 30    |
| H(17A) | 3544  | 6191  | 10340 | 28    |
| H(18A) | 1493  | 5874  | 9544  | 33    |
| H(19A) | 1325  | 6112  | 7729  | 35    |
| H(20A) | 3219  | 6570  | 6767  | 29    |
| H(21A) | 6541  | 5433  | 5369  | 31    |
| H(22A) | 5695  | 5639  | 3681  | 36    |
| H(23A) | 4138  | 7379  | 2991  | 39    |
| H(24A) | 3479  | 8899  | 4025  | 36    |
| H(27A) | 2915  | 10195 | 5099  | 41    |
| H(28A) | 2514  | 11520 | 6325  | 51    |
| H(29A) | 3671  | 10972 | 7946  | 52    |
| H(30A) | 5204  | 9161  | 8302  | 46    |

## Computational Methods

### Structure

The structures of both  $[\text{Ru}(\text{bpy})_2(66'\text{bpy}(\text{OH})_2)]^{2+}$  and  $[\text{Ru}(\text{bpy})_2(66'\text{bpy}(\text{O}^-)_2)]$  were also studied through computational methods in the gas phase. Selected bond lengths and angles are reported in Table 1. All of the Ru-N bond lengths are overestimated by approximately 0.04 to 0.06 Å compared to the crystal structure data, similar to other ruthenium polypyridyl complexes.<sup>[7]</sup> The structure is a distorted octahedron with Ru-N bond lengths for the 6,6'-hydroxy-substituted ligand that are longer than the Ru-N bond lengths for the unsubstituted ligands in all cases and in accordance with the crystal structure. The theoretical data predicts that the Ru-N bond lengths for the 6,6'-hydroxy-substituted ligand will decrease by ~ 0.07 Å upon deprotonation of the complex. The decrease in bond length upon deprotonation is not observed in the experimental crystal structure. In addition, from simple bond order analysis, there is a slight increase in the bond order between the metal and 66'bpy(O<sup>-</sup>)<sub>2</sub> ligand that occurs upon deprotonation of the complex (0.4 to 0.5), which helps to explain why photo-dissociation is much slower once deprotonated (see below). The theoretical C-O bond lengths decrease upon deprotonation from 1.347 Å and 1.346 Å to 1.247 Å and 1.248 Å, which is in accordance with the crystal structure data.

**[Ru(bpy)<sub>2</sub>(66'bpy(OH)<sub>2</sub>)]<sup>2+</sup>**

Nuclear Repulsion Energy (a.u.) = -1705.510299

Total Energy (a.u.) = 4816.556905

Max. Gradient = 0.000361 hartree/bohr      RMS Gradient = 0.000116 hartree/bohr

Number of Imaginary Frequencies = 0

C<sub>1</sub> symmetry

Nuclear Coordinates (Ångstroms)

|    |      |               |               |               |
|----|------|---------------|---------------|---------------|
| RU | 44.0 | 7.3030648272  | 9.5549795520  | 6.3566713761  |
| N  | 7.0  | 8.4832210289  | 10.4330406972 | 7.9334011349  |
| N  | 7.0  | 6.2049342362  | 11.3646296113 | 6.8409602622  |
| N  | 7.0  | 5.9705967948  | 8.5333705726  | 7.6146312118  |
| N  | 7.0  | 5.9815811218  | 8.7130757477  | 4.9804146146  |
| N  | 7.0  | 8.6219630584  | 10.3783320278 | 4.9586449306  |
| N  | 7.0  | 8.4767567859  | 7.9046983876  | 5.8704996550  |
| O  | 8.0  | 10.1578880641 | 8.8946880390  | 7.7992710299  |
| O  | 8.0  | 4.7133779496  | 11.1725871262 | 5.1363211596  |
| C  | 6.0  | 9.6679966748  | 9.9955753653  | 8.4002837142  |
| C  | 6.0  | 10.3615608497 | 10.6235454138 | 9.4452228181  |
| C  | 6.0  | 9.8118062472  | 11.7564254245 | 10.0195751022 |
| C  | 6.0  | 8.5916488193  | 12.2332970163 | 9.5407261405  |
| C  | 6.0  | 7.9489338027  | 11.5571073593 | 8.5041648243  |
| C  | 6.0  | 6.6625613408  | 12.0279790992 | 7.9460297352  |
| C  | 6.0  | 5.9679792338  | 13.1030600210 | 8.4988990265  |
| C  | 6.0  | 4.7886078974  | 13.5422457446 | 7.8966305269  |
| C  | 6.0  | 4.3439366555  | 12.9060032967 | 6.7509817750  |
| C  | 6.0  | 5.0850147519  | 11.8229651170 | 6.2548883178  |
| C  | 6.0  | 6.0196188470  | 8.5124039310  | 8.9599081482  |
| C  | 6.0  | 5.0879490593  | 7.8359169496  | 9.7399542062  |
| C  | 6.0  | 4.0547164947  | 7.1498812333  | 9.1014187016  |
| C  | 6.0  | 3.9963683467  | 7.1662604575  | 7.7098214523  |
| C  | 6.0  | 4.9646818617  | 7.8654210155  | 6.9814965084  |
| C  | 6.0  | 4.9920217979  | 7.9400724409  | 5.5069341318  |
| C  | 6.0  | 4.0755720384  | 7.2799120526  | 4.6811281012  |
| C  | 6.0  | 4.1727960024  | 7.4119072476  | 3.2983245038  |
| C  | 6.0  | 5.1884040090  | 8.2093555353  | 2.7701458398  |
| C  | 6.0  | 6.0670308867  | 8.8400682602  | 3.6456261524  |
| C  | 6.0  | 8.6574282828  | 11.6688199825 | 4.5785055123  |
| C  | 6.0  | 9.5762700255  | 12.1576492994 | 3.6556206235  |
| C  | 6.0  | 10.5027688130 | 11.2737660201 | 3.1023678553  |

|   |     |               |               |               |
|---|-----|---------------|---------------|---------------|
| C | 6.0 | 10.4747944102 | 9.9375369962  | 3.4935859083  |
| C | 6.0 | 9.5256120698  | 9.5072088122  | 4.4264995765  |
| C | 6.0 | 9.4175283035  | 8.1165247442  | 4.9097373098  |
| C | 6.0 | 10.2194648579 | 7.0698140966  | 4.4463554751  |
| C | 6.0 | 10.0629795329 | 5.7917244207  | 4.9771547519  |
| C | 6.0 | 9.1032541730  | 5.5886972275  | 5.9673402646  |
| C | 6.0 | 8.3337497852  | 6.6704975594  | 6.3809561772  |
| H | 1.0 | 11.0106257053 | 8.6556640035  | 8.2003997368  |
| H | 1.0 | 3.9073858052  | 11.5793017944 | 4.7750816471  |
| H | 1.0 | 11.3124090628 | 10.2236896360 | 9.7855824711  |
| H | 1.0 | 10.3253392746 | 12.2695434786 | 10.8265556571 |
| H | 1.0 | 8.1651897494  | 13.1298021777 | 9.9690182678  |
| H | 1.0 | 6.3265366267  | 13.6002504124 | 9.3899365727  |
| H | 1.0 | 4.2337565788  | 14.3758581276 | 8.3156943872  |
| H | 1.0 | 3.4405001164  | 13.2267227910 | 6.2401355619  |
| H | 1.0 | 6.8416687488  | 9.0551932192  | 9.4109038463  |
| H | 1.0 | 5.1760720319  | 7.8502176766  | 10.8212445525 |
| H | 1.0 | 3.3070816552  | 6.6102033243  | 9.6741674112  |
| H | 1.0 | 3.1981336017  | 6.6397608216  | 7.1999154589  |
| H | 1.0 | 3.2941173777  | 6.6626127045  | 5.1097499357  |
| H | 1.0 | 3.4688958589  | 6.9011022810  | 2.6480749914  |
| H | 1.0 | 5.3040034251  | 8.3448118053  | 1.6998038996  |
| H | 1.0 | 6.8605126612  | 9.4796205401  | 3.2779939713  |
| H | 1.0 | 7.9155597288  | 12.3131199838 | 5.0351976636  |
| H | 1.0 | 9.5611549599  | 13.2070280462 | 3.3819384860  |
| H | 1.0 | 11.2358147141 | 11.6169979046 | 2.3790532705  |
| H | 1.0 | 11.1926828480 | 9.2397221428  | 3.0790264036  |
| H | 1.0 | 10.9600119711 | 7.2441750827  | 3.6748233684  |
| H | 1.0 | 10.6790912013 | 4.9722497682  | 4.6222991114  |
| H | 1.0 | 8.9456265162  | 4.6125937994  | 6.4137660548  |
| H | 1.0 | 7.5789900436  | 6.5598345766  | 7.1494287175  |

## [Ru(bpy)<sub>2</sub>(66'bpy(O<sup>-</sup>)<sub>2</sub>)]

Nuclear Repulsion Energy (a.u.) = -1704.211323

Total Energy (a.u.) = 4761.500132

Max. Gradient = 0.000100 hartree/bohr      RMS Gradient = 0.000021 hartree/bohr

Number of Imaginary Frequencies = 0

C<sub>1</sub> symmetry

Nuclear Coordinates (Ångstroms)

|    |      |               |               |               |
|----|------|---------------|---------------|---------------|
| RU | 44.0 | 8.5001620788  | 9.0595792488  | 9.2189350226  |
| N  | 7.0  | 10.3773400059 | 9.2561019274  | 8.3776583080  |
| N  | 7.0  | 9.2104941138  | 7.1038400582  | 9.2983234386  |
| N  | 7.0  | 9.1424310325  | 9.2729197506  | 11.2213174470 |
| N  | 7.0  | 6.7020693283  | 8.7931231890  | 10.2936941434 |
| N  | 7.0  | 7.6789897907  | 9.0057396603  | 7.3117279697  |
| N  | 7.0  | 7.8102696374  | 11.0363036600 | 9.0040925969  |
| O  | 8.0  | 10.1238103916 | 11.3569731046 | 7.4618319931  |
| O  | 8.0  | 7.2391398838  | 6.0442817725  | 9.8204565538  |
| C  | 6.0  | 10.8627228153 | 10.4072672765 | 7.7047049834  |
| C  | 6.0  | 12.2706725102 | 10.4209691057 | 7.2883706351  |
| C  | 6.0  | 13.0619875681 | 9.3172229147  | 7.4374465245  |
| C  | 6.0  | 12.5004063876 | 8.1570340758  | 8.0178643414  |
| C  | 6.0  | 11.1694664819 | 8.1619392977  | 8.4643729524  |
| C  | 6.0  | 10.5210929617 | 6.9623002150  | 9.0136672734  |
| C  | 6.0  | 11.2086519391 | 5.7484938674  | 9.2010600665  |
| C  | 6.0  | 10.5253772736 | 4.6230415096  | 9.7070166359  |
| C  | 6.0  | 9.1873842675  | 4.7317146703  | 9.9782844252  |
| C  | 6.0  | 8.4626892207  | 5.9782498030  | 9.7163164937  |
| C  | 6.0  | 10.4003418827 | 9.5519761586  | 11.6128731863 |
| C  | 6.0  | 10.7588241171 | 9.6919246799  | 12.9488437468 |
| C  | 6.0  | 9.7733502434  | 9.5323938667  | 13.9233278313 |
| C  | 6.0  | 8.4695970407  | 9.2479537213  | 13.5242804493 |
| C  | 6.0  | 8.1684166674  | 9.1234009943  | 12.1639526804 |
| C  | 6.0  | 6.8116305399  | 8.8505240462  | 11.6466268582 |
| C  | 6.0  | 5.6945138090  | 8.6643909132  | 12.4662073058 |
| C  | 6.0  | 4.4498634959  | 8.4246358889  | 11.8886780601 |
| C  | 6.0  | 4.3499949814  | 8.3770534574  | 10.4997086547 |
| C  | 6.0  | 5.5014811777  | 8.5626158191  | 9.7410901941  |
| C  | 6.0  | 7.6698615652  | 7.9254173322  | 6.5060070369  |
| C  | 6.0  | 7.1213036588  | 7.9505224033  | 5.2297237900  |
| C  | 6.0  | 6.5678233310  | 9.1441235743  | 4.7641683891  |

|   |     |               |               |               |
|---|-----|---------------|---------------|---------------|
| C | 6.0 | 6.5779461704  | 10.2641172770 | 5.5923161173  |
| C | 6.0 | 7.1390616800  | 10.1789753093 | 6.8699218820  |
| C | 6.0 | 7.1904313570  | 11.3032108767 | 7.8238784804  |
| C | 6.0 | 6.6576703669  | 12.5668668701 | 7.5616408336  |
| C | 6.0 | 6.7728011675  | 13.5746790629 | 8.5170725382  |
| C | 6.0 | 7.4160556002  | 13.2913360259 | 9.7197746951  |
| C | 6.0 | 7.9157310246  | 12.0079944584 | 9.9228588455  |
| H | 1.0 | 12.6203957360 | 11.3390625762 | 6.8275962092  |
| H | 1.0 | 14.0959634302 | 9.3132411217  | 7.1063096894  |
| H | 1.0 | 13.1076616527 | 7.2646793507  | 8.1040012043  |
| H | 1.0 | 12.2656864853 | 5.6728965130  | 8.9810285748  |
| H | 1.0 | 11.0594377574 | 3.6923561058  | 9.8732025303  |
| H | 1.0 | 8.5962274847  | 3.9058948120  | 10.3600880616 |
| H | 1.0 | 11.1295975527 | 9.6775074866  | 10.8218621265 |
| H | 1.0 | 11.7852699638 | 9.9236455222  | 13.2123778044 |
| H | 1.0 | 10.0124063501 | 9.6330146773  | 14.9776052741 |
| H | 1.0 | 7.6940887370  | 9.1279750474  | 14.2710730601 |
| H | 1.0 | 5.7877599339  | 8.7040378819  | 13.5447815647 |
| H | 1.0 | 3.5759944008  | 8.2760183383  | 12.5152541352 |
| H | 1.0 | 3.4030500598  | 8.1897958886  | 10.0050115739 |
| H | 1.0 | 5.4734608590  | 8.5092632978  | 8.6600196283  |
| H | 1.0 | 8.1091477187  | 7.0247539494  | 6.9160657883  |
| H | 1.0 | 7.1289069337  | 7.0529782719  | 4.6204938597  |
| H | 1.0 | 6.1326692190  | 9.2040027401  | 3.7714380162  |
| H | 1.0 | 6.1552493978  | 11.1972229974 | 5.2400183543  |
| H | 1.0 | 6.1605741680  | 12.7716273366 | 6.6210903831  |
| H | 1.0 | 6.3671389042  | 14.5623354151 | 8.3212449070  |
| H | 1.0 | 7.5330913491  | 14.0442777173 | 10.4918175465 |
| H | 1.0 | 8.4230050176  | 11.7453271647 | 10.8432229552 |

### Supporting Information References

- [1] S. Klein, W. G. Dougherty, W. S. Kassel, T. J. Dudley, J. J. Paul, *Inorg. Chem.* **50** (2011) 2754-2763.
- [2] E. M. Kober, B. P. Sullivan, T. J. Meyer, *Inorg. Chem.* **23** (1984) 2098-2104.
- [3] M. J. Fuentes, R. J. Bognanno, W. G. Dougherty, W. J. Boyko, W. S. Kassel, T. J. Dudley, J. J. Paul, *Dalton Trans.* **41** (2012) 12514-12523.
- [4] A. T. R. Williams, S. A. Winfield, J. N. Miller, *Analyst.* **108** (1983) 1067-1071.
- [5] K. Suzuki, A. Kobayashi, S. Kaneko, K. Takehira, T. Yoshihara, H. Ishida, Y. Shiina, S. Oishi, S. Tobita, *Phys. Chem. Chem. Phys.* **11** (2009) 9850-9860.
- [6] J. R. Lakowicz, *Principles of Fluorescence Spectroscopy*, Springer Science, New York, 2006.
- [7] G. D. Will, G. J. Wilson, *Inorg. Chim. Acta.* **363** (2010) 1627-1638.
